# Supplementary material for: Facile assembly of indeno[1,2-c]chromenes via a palladium-catalyzed reaction of 2-alkynylhalobenzene
Source: Royal Society of Chemistry journal article supplement (doi:10.1039/c2ob26369f), 2012-01-01

# Facile assembly of indeno[1,2-*c*]chromenes via a palladium-catalyzed reaction of 2-alkynylhalobenzene

Xiaolin Pan,<sup>a</sup> Hongming Nie,<sup>b</sup> Yong Luo,<sup>a</sup> Yueqiu Gao,<sup>\*b</sup> and Jie Wu<sup>\*,a,c</sup>

<sup>a</sup> Department of Chemistry, Fudan University, 220 Handan Road, Shanghai 200433, China

<sup>b</sup> Department of hepatology disease, Shanghai Shuguang hospital, Shanghai University of T.C.M.,  
Shanghai 201203, China

<sup>c</sup> State Key Laboratory of Organometallic Chemistry, Shanghai Institute of Organic Chemistry,  
Chinese Academy of Sciences, 354 Fenglin Road, Shanghai 200032, China

jie\_wu@fudan.edu.cn; gaoyueqiu@hotmail.com

## Supporting Information

1. General experimental methods (S2).
2. General experimental procedure and characterization data (S2-S12).
3. <sup>1</sup>H and <sup>13</sup>C NMR spectra of compound **3** (S13-S64).

## General experimental methods:

All reactions were performed in reaction tubes under air atmosphere. Flash column chromatography was performed using silica gel (60-Å pore size, 32–63 μm, standard grade). Analytical thin-layer chromatography was performed using glass plates pre-coated with 0.25 mm 230–400 mesh silica gel impregnated with a fluorescent indicator (254 nm). Thin layer chromatography plates were visualized by exposure to ultraviolet light. Organic solutions were concentrated on rotary evaporators at ~20 Torr (house vacuum) at 25–35°C. Commercial reagents and solvents were used as received. Nuclear magnetic resonance (NMR) spectra are recorded in parts per million from internal tetramethylsilane on the δ scale.

*General experimental procedure for the synthesis of indeno[1,2-c]chromenes via a Pd-catalyzed reaction of 2-alkynylbromobenzene with 2-alkynylphenol.*

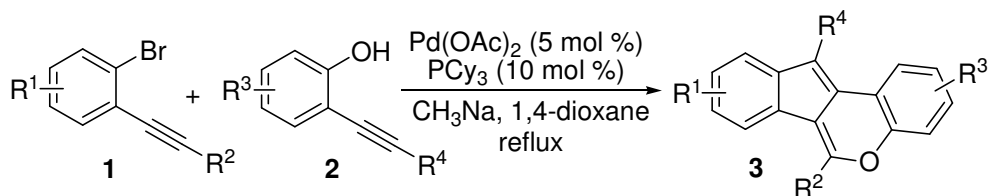

2-Alkynylhalobenzene (0.40 mmol) was added to a mixture of Pd(OAc)<sub>2</sub> (5 mol %), tricyclohexylphosphine (10 mol %), CH<sub>3</sub>ONa (0.80 mmol), and 2-alkynylphenol (0.60 mmol) in 1,4-dioxane (3.0 mL). The mixture was stirred under reflux. After completion of the reaction as indicated by TLC, the mixture was cooled and diluted by EtOAc (10 mL), washed with saturated brine (2 × 10 mL), and dried by anhydrous Na<sub>2</sub>SO<sub>4</sub>. Evaporation of the solvent followed by purification on silica gel provided the product **3**.

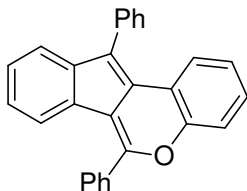

6,11-Diphenylindeno[1,2-c]chromene (**3a**). Red solid,  $^1\text{H}$  NMR (400 MHz,  $\text{CDCl}_3$ ):  $\delta$  7.90-7.87 (m, 2H), 7.69 (dd,  $J = 8.0, 1.2$  Hz, 1H), 7.62-7.44 (m, 10H), 7.38-7.29 (m, 3H), 7.11-7.04 (m, 2H).  $^{13}\text{C}$  NMR (100 MHz)  $\delta$  152.6, 150.1, 144.4, 136.6, 133.8, 130.5, 130.0, 129.7, 129.5, 128.9, 128.8, 127.7, 127.4, 126.7, 126.5, 124.9, 124.3, 123.8, 122.8, 121.5, 120.1, 119.3, 117.7, 117.3. HRMS (ESI) calculated for  $\text{C}_{28}\text{H}_{18}\text{O}$   $[\text{M}+\text{H}]^+$  requires 371.1436, found 371.1424.

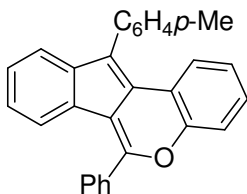

6-Phenyl-11-(*p*-tolyl)indeno[1,2-c]chromene (**3b**). Red solid,  $^1\text{H}$  NMR (400 MHz,  $\text{CDCl}_3$ ):  $\delta$  7.89-7.87 (m, 2H), 7.75-7.73 (m, 1H), 7.63-7.60 (m, 3H), 7.50-7.43 (m, 4H), 7.39-7.35 (m, 3H), 7.33-7.29 (m, 2H), 7.10-7.05 (m, 2H), 2.49 (s, 3H).  $^{13}\text{C}$  NMR (100 MHz)  $\delta$  152.4, 150.1, 144.5, 137.1, 133.9, 133.5, 130.5, 129.8, 129.6, 129.5, 128.8, 127.6, 126.65, 126.60, 124.9, 124.2, 123.6, 122.7, 121.4, 120.2, 119.4, 117.6, 117.3, 21.5. HRMS (ESI) calculated for  $\text{C}_{29}\text{H}_{20}\text{O}$   $[\text{M}+\text{H}]^+$  requires 385.1592, found 385.1599.

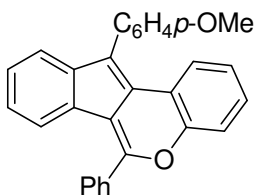

11-(4-Methoxyphenyl)-6-phenylindeno[1,2-c]chromene (**3c**). Red solid,  $^1\text{H}$  NMR (400 MHz,  $\text{CDCl}_3$ ):  $\delta$  7.90-7.88 (m, 2H), 7.73 (dd,  $J = 8.0, 1.2$  Hz, 1H), 7.64-7.62 (m, 3H), 7.52-7.49 (m, 3H), 7.46-7.44 (m, 1H), 7.39-7.31 (m, 3H), 7.12-7.07 (m, 4H), 3.95 (s, 3H).  $^{13}\text{C}$  NMR (100 MHz)  $\delta$  158.9, 134.2, 131.1, 130.5, 129.5, 128.7, 127.6, 126.7, 124.8, 124.2, 122.7, 121.4, 119.3, 117.7, 114.3, 55.3. HRMS (ESI) calculated for  $\text{C}_{29}\text{H}_{20}\text{O}_2$   $[\text{M}+\text{H}]^+$  requires 401.1542, found 401.1530.

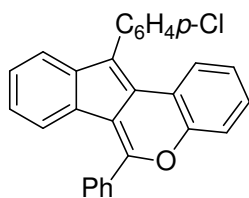

11-(4-Chlorophenyl)-6-phenylindeno[1,2-c]chromene (**3d**). Red solid,  $^1\text{H}$  NMR (400 MHz,  $\text{CDCl}_3$ ):  $\delta$  7.88-7.86 (m, 2H), 7.66 (dd,  $J = 8.4, 1.2\text{Hz}$ , 1H), 7.62-7.60 (m, 3H), 7.54-7.49 (m, 5H), 7.46-7.44 (m, 1H), 7.35-7.32 (m, 3H), 7.11-7.08 (m, 2H).  $^{13}\text{C}$  NMR (100 MHz)  $\delta$  152.9, 150.1, 143.9, 135.1, 133.7, 133.2, 131.4, 130.6, 129.7, 129.5, 129.2, 128.8, 127.9, 126.8, 125.0, 124.7, 124.4, 124.1, 122.9, 121.5, 119.8, 119.0, 117.8, 117.2. HRMS (ESI) calculated for  $\text{C}_{28}\text{H}_{17}\text{ClO}$   $[\text{M}+\text{H}]^+$  requires 405.1046, found 405.1045.

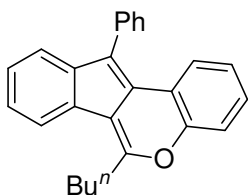

6-Butyl-11-phenylindeno[1,2-c]chromene (**3e**). Yellow solid,  $^1\text{H}$  NMR (400 MHz,  $\text{CDCl}_3$ ):  $\delta$  7.96 (d,  $J = 7.6\text{ Hz}$ , 1H), 7.64 (d,  $J = 8.0\text{Hz}$ , 1H), 7.55-7.51 (m, 4H), 7.47-7.27 (m, 6H), 7.05-7.00 (m, 1H), 3.23 (t,  $J = 7.6\text{ Hz}$ , 2H), 1.99-1.91 (m, 2H), 1.61-1.55 (m, 2H), 1.02 (t,  $J = 7.6\text{ Hz}$ , 3H).  $^{13}\text{C}$  NMR (100 MHz)  $\delta$  157.2, 149.9, 144.1, 136.8, 130.1, 129.8, 128.8, 127.4, 127.3, 125.9, 125.2, 124.9, 124.1, 123.4, 122.9, 121.5, 120.2, 119.5, 117.4, 116.2, 32.4, 29.6, 22.7, 13.9. HRMS (ESI) calculated for  $\text{C}_{26}\text{H}_{22}\text{O}$   $[\text{M}+\text{H}]^+$  requires 351.1749, found 351.1746.

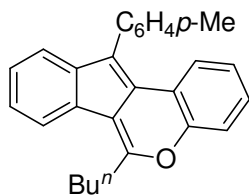

6-Butyl-11-(p-tolyl)indeno[1,2-c]chromene (**3f**). Yellow solid,  $^1\text{H}$  NMR (400 MHz,  $\text{CDCl}_3$ ):  $\delta$  7.94 (d,  $J = 7.2\text{ Hz}$ , 1H), 7.69 (dd,  $J = 8.0, 0.9\text{ Hz}$ , 1H), 7.44-7.32(m, 8H), 7.29-7.25(m, 1H), 7.04-7.01 (m, 1H), 3.21 (t,  $J = 7.6\text{ Hz}$ , 2H), 2.47 (s, 3H), 1.97-1.90 (m, 2H), 1.59-1.53 (m, 2H), 1.01 (t,  $J = 7.2\text{ Hz}$ , 3H).  $^{13}\text{C}$  NMR (100 MHz)  $\delta$  157.0, 149.9,

144.2, 136.8, 133.7, 129.9, 129.8, 129.5, 127.3, 125.9, 125.2, 124.9, 124.0, 123.2, 122.8, 121.5, 120.3, 119.6, 117.4, 116.3, 32.3, 29.6, 22.7, 21.4, 14.0. HRMS (ESI) calculated for  $C_{27}H_{24}O$   $[M+H]^+$  requires 365.1905, found 365.1890.

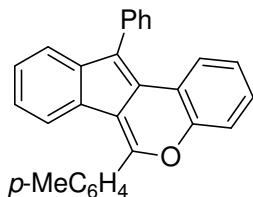

11-Phenyl-6-(*p*-tolyl)indeno[1,2-*c*]chromene (**3g**). Red solid,  $^1H$  NMR (400 MHz,  $CDCl_3$ ):  $\delta$  7.78 (d,  $J = 8.0$  Hz, 2H), 7.68 (dd,  $J = 8.0, 1.2$  Hz, 1H), 7.60-7.53 (m, 5H), 7.48-7.40 (m, 4H), 7.37-7.28 (m, 3H), 7.11-7.03 (m, 2H), 2.51 (s, 3H).  $^{13}C$  NMR (100 MHz)  $\delta$  152.9, 150.1, 144.3, 140.8, 136.7, 130.9, 130.0, 129.8, 129.45, 129.43, 128.9, 127.6, 127.4, 126.6, 126.3, 124.8, 124.2, 123.8, 122.7, 121.5, 120.1, 119.3, 117.7, 117.0, 21.7. HRMS (ESI) calculated for  $C_{29}H_{20}O$   $[M+H]^+$  requires 385.1592, found 385.1579.

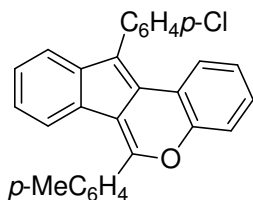

11-(4-Chlorophenyl)-6-(*p*-tolyl)indeno[1,2-*c*]chromene (**3h**). Red solid,  $^1H$  NMR (400 MHz,  $CDCl_3$ ):  $\delta$  7.77 (d,  $J = 8.0$  Hz, 2H), 7.66 (dd,  $J = 8.0, 1.2$  Hz, 1H), 7.58-7.56 (m, 1H), 7.56-7.52 (m, 4H), 7.47-7.41 (m, 3H), 7.36-7.32 (m, 3H), 7.12-7.10 (m, 2H), 2.52 (s, 3H).  $^{13}C$  NMR (100 MHz)  $\delta$  153.2, 150.2, 143.9, 140.9, 135.2, 134.2, 133.2, 131.5, 130.8, 129.8, 129.5, 129.4, 129.2, 127.9, 126.6, 124.7, 124.3, 122.8, 121.6, 119.8, 119.0, 117.8, 117.0, 21.7. HRMS (ESI) calculated for  $C_{29}H_{19}ClO$   $[M+H]^+$  requires 419.1203, found 419.1178.

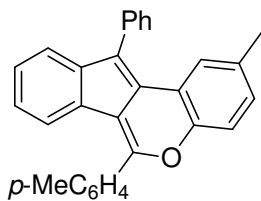

2-Methyl-11-phenyl-6-(*p*-tolyl)indeno[1,2-*c*]chromene (**3i**). Red solid,  $^1\text{H}$  NMR (400 MHz,  $\text{CDCl}_3$ ):  $\delta$  7.76 (d,  $J = 8.0$  Hz, 2H), 7.60-7.52 (m, 5H), 7.47-7.44(m, 2H), 7.41-7.37(m, 3H), 7.34-7.29 (m, 2H), 7.11-7.07 (m, 2H), 2.50 (s, 3H), 2.18 (s, 3H).  $^{13}\text{C}$  NMR (100 MHz)  $\delta$  153.0, 148.3, 144.2, 140.7, 136.7, 133.6, 131.0, 130.0, 129.8, 129.4, 128.73, 128.67, 127.4, 126.4, 125.9, 124.8, 124.0, 122.5, 121.4, 119.7, 119.2, 117.4, 116.9, 21.6, 21.2. HRMS (ESI) calculated for  $\text{C}_{30}\text{H}_{22}\text{O}$   $[\text{M}+\text{H}]^+$  requires 399.1749, found 399.1760.

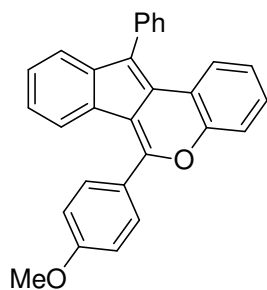

6-(4-Methoxyphenyl)-11-phenylindeno[1,2-*c*]chromene (**3j**). Red solid,  $^1\text{H}$  NMR (400 MHz,  $\text{CDCl}_3$ ):  $\delta$  7.84 (d,  $J = 8.4$  Hz, 2H), 7.68 (d,  $J = 8.0$ Hz, 1H), 7.63-7.53 (m, 5H), 7.48-7.42 (m, 2H), 7.38-7.28 (m, 3H), 7.13-7.10 (m, 3H), 7.07-7.03 (m, 1H), 3.92 (s, 3H).  $^{13}\text{C}$  NMR (100 MHz)  $\delta$  161.3, 152.7, 150.1, 144.2, 136.7, 131.1, 130.0, 129.9, 128.9, 127.6, 127.4, 126.5, 126.0, 124.8, 124.1, 123.9, 122.6, 121.4, 120.1, 119.3, 117.6, 116.8, 114.1, 113.5, 55.4. HRMS (ESI) calculated for  $\text{C}_{29}\text{H}_{20}\text{O}_2$   $[\text{M}+\text{H}]^+$  requires 401.1542, found 401.1525.

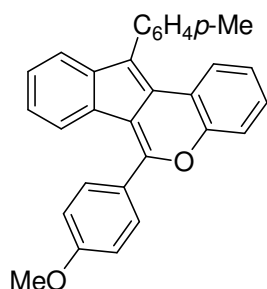

6-(4-Methoxyphenyl)-11-(*p*-tolyl)indeno[1,2-*c*]chromene (**3k**). Red solid,  $^1\text{H}$  NMR (400 MHz,  $\text{CDCl}_3$ ):  $\delta$  7.83-7.81 (m, 2H), 7.73 (dd,  $J = 8.0, 1.2$ Hz, 1H), 7.60 (d,  $J = 7.6$ Hz, 1H), 7.47-7.45 (m, 2H), 7.43-7.26 (m, 6H), 7.11-7.03 (m, 4H), 3.90 (s, 3H), 2.48 (s, 3H).  $^{13}\text{C}$  NMR (100 MHz)  $\delta$  161.2, 152.6, 150.1, 144.3, 136.9, 133.6, 131.1, 129.8, 129.6, 127.5, 126.5, 126.2, 126.1, 124.8, 124.1, 123.8, 122.6, 121.4, 120.2, 119.3, 117.6, 116.9, 114.1,

55.4, 21.4. HRMS (ESI) calculated for  $C_{30}H_{22}O_2$   $[M+H]^+$  requires 415.1698, found 415.1694.

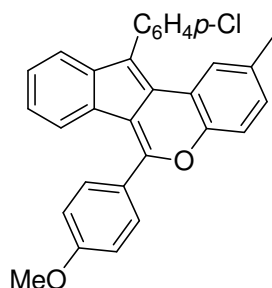

11-(4-Chlorophenyl)-6-(4-methoxyphenyl)-2-methylindeno[1,2-c]chromene (**3l**). Red solid,  $^1H$  NMR (400 MHz,  $CDCl_3$ ):  $\delta$  7.83 (d,  $J = 8.4$  Hz, 2H), 7.61-7.59 (m, 1H), 7.53(m, 4H), 7.47 (s, 1H), 7.37-7.32 (m, 3H), 7.16-7.10 (m, 4H), 3.95 (s, 3H), 2.24 (s, 3H).  $^{13}C$  NMR (100 MHz)  $\delta$  161.3, 153.1, 148.3, 143.8, 135.3, 133.8, 133.1, 131.5, 131.1, 129.8, 128.9, 126.5, 126.0, 124.5, 124.4, 124.2, 122.7, 121.4, 119.5, 118.9, 117.5, 116.6, 114.1, 55.5, 21.3. HRMS (ESI) calculated for  $C_{30}H_{21}ClO_2$   $[M+H]^+$  requires 449.1308, found 449.1326.

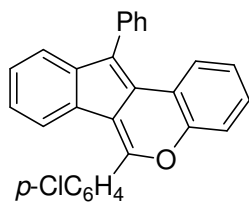

6-(4-Chlorophenyl)-11-phenylindeno[1,2-c]chromene (**3m**). Red solid,  $^1H$  NMR (400 MHz,  $CDCl_3$ ):  $\delta$  7.83 (d,  $J = 8.4$  Hz, 2H), 7.67 (dd,  $J = 8.0, 1.2$  Hz, 1H), 7.60-7.56 (m, 6H), 7.52-7.42 (m, 3H), 7.37-7.30 (m, 3H), 7.14-7.05 (m, 2H).  $^{13}C$  NMR (100 MHz)  $\delta$  151.2, 150.0, 144.5, 136.7, 136.5, 132.2, 130.9, 129.9, 129.5, 129.1, 128.9, 127.8, 127.5, 126.92, 126.86, 124.9, 124.4, 123.7, 122.9, 121.3, 119.9, 119.5, 117.6. HRMS (ESI) calculated for  $C_{28}H_{17}ClO$   $[M+H]^+$  requires 405.1046, found 405.1024.

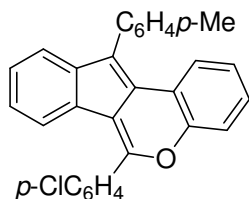

6-(4-Chlorophenyl)-11-(*p*-tolyl)indeno[1,2-*c*]chromene (**3n**). Red solid,  $^1\text{H}$  NMR (400 MHz,  $\text{CDCl}_3$ ):  $\delta$  7.82 (d,  $J = 8.4$  Hz, 2H), 7.72 (dd,  $J = 8.0, 1.2$  Hz, 1H), 7.60-7.58 (m, 2H), 7.51-7.41 (m, 4H), 7.37-7.29 (m, 5H), 7.13-7.06 (m, 2H), 2.50 (s, 3H).  $^{13}\text{C}$  NMR (100 MHz)  $\delta$  151, 150.0, 144.6, 137.2, 136.6, 134.2, 133.3, 132.2, 131.0, 129.7, 129.6, 129.1, 128.8, 127.7, 126.9, 124.9, 124.3, 123.5, 122.9, 121.3, 120.1, 119.5, 117.6, 21.5. HRMS (ESI) calculated for  $\text{C}_{29}\text{H}_{19}\text{ClO}$   $[\text{M}+\text{H}]^+$  requires 419.1203, found 419.1191.

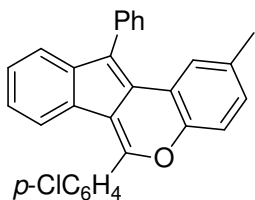

6-(4-Chlorophenyl)-2-methyl-11-phenylindeno[1,2-*c*]chromene (**3o**). Red solid,  $^1\text{H}$  NMR (400 MHz,  $\text{CDCl}_3$ ):  $\delta$  7.83 (d,  $J = 8.0$  Hz, 2H), 7.60-7.56 (m, 6H), 7.51-7.45 (m, 3H), 7.39-7.32 (m, 3H), 7.14-7.09 (m, 2H), 2.19 (s, 3H).  $^{13}\text{C}$  NMR (100 MHz)  $\delta$  151.2, 148.2, 144.4, 136.5, 133.9, 132.3, 130.9, 129.9, 129.54, 129.51, 129.1, 128.8, 127.5, 126.8, 126.5, 124.8, 123.8, 122.8, 121.3, 119.6, 119.4, 117.3, 21.2. HRMS (ESI) calculated for  $\text{C}_{29}\text{H}_{19}\text{ClO}$   $[\text{M}+\text{H}]^+$  requires 419.1203, found 419.1178.

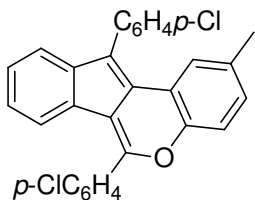

6,11-Bis(4-chlorophenyl)-2-methylindeno[1,2-*c*]chromene (**3p**). Red solid,  $^1\text{H}$  NMR (400 MHz,  $\text{CDCl}_3$ ):  $\delta$  7.83-7.81 (m, 2H), 7.61-7.59 (m, 2H), 7.55-7.46 (m, 6H), 7.36-7.33 (m, 3H), 7.18-7.10 (m, 2H), 2.24 (s, 3H).  $^{13}\text{C}$  NMR (100 MHz)  $\delta$  151.5, 148.2, 144.1, 136.6, 135.0, 134.1, 133.3, 132.2, 131.4, 130.9, 129.4, 129.13, 129.09, 129.07, 126.9, 124.9, 124.6, 124.1, 122.9, 121.4, 119.4, 119.1, 117.5, 21.3. HRMS (ESI) calculated for  $\text{C}_{29}\text{H}_{18}\text{Cl}_2\text{O}$   $[\text{M}+\text{H}]^+$  requires 453.0813, found 453.0780.



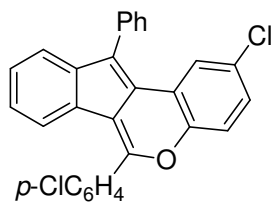

2-Chloro-6-(4-chlorophenyl)-11-phenylindeno[1,2-c]chromene (**3q**). Red solid,  $^1\text{H}$  NMR (400 MHz,  $\text{CDCl}_3$ ):  $\delta$  7.83 (m, 2H), 7.62-7.51 (m, 9H), 7.38-7.36 (3H), 7.28-7.27 (m, 1H), 7.17-7.13 (m, 1H).  $^{13}\text{C}$  NMR (100 MHz)  $\delta$  148.4, 136.8, 135.6, 134.3, 131.9, 130.9, 129.7, 129.5, 129.2, 129.1, 127.9, 127.7, 127.1, 124.2, 123.4, 121.4, 121.3, 119.8, 118.9. HRMS (ESI) calculated for  $\text{C}_{28}\text{H}_{16}\text{Cl}_2\text{O}$   $[\text{M}+\text{H}]^+$  requires 439.0656, found 439.0635.

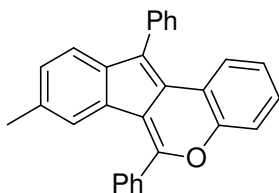

8-Methyl-6,11-diphenylindeno[1,2-c]chromene (**3r**). Red solid,  $^1\text{H}$  NMR (400 MHz,  $\text{CDCl}_3$ ):  $\delta$  7.89-7.87 (m, 2H), 7.67-7.53 (m, 8H), 7.47-7.41 (m, 2H), 7.31-7.21 (m, 3H), 7.16-7.14 (m, 1H), 7.06-7.02 (m, 1H), 2.30 (s, 3H).  $^{13}\text{C}$  NMR (100 MHz)  $\delta$  152.3, 150.0, 142.1, 136.8, 133.9, 132.4, 130.5, 130.1, 129.9, 129.6, 128.8, 128.7, 127.8, 127.5, 127.4, 126.5, 124.7, 124.2, 123.0, 121.9, 120.2, 119.1, 117.6, 117.3, 21.8. HRMS (ESI) calculated for  $\text{C}_{29}\text{H}_{20}\text{O}$   $[\text{M}+\text{H}]^+$  requires 385.1592, found 385.1590.

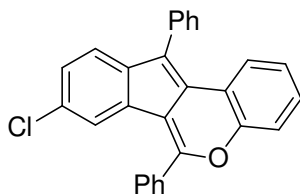

8-Chloro-6,11-diphenylindeno[1,2-c]chromene (**3s**). Red solid,  $^1\text{H}$  NMR (400 MHz,  $\text{CDCl}_3$ ):  $\delta$  7.89-7.87 (m, 2H), 7.67-7.66 (m, 4H), 7.59-7.56 (m, 4H), 7.51-7.45 (m, 3H), 7.36-7.32 (m, 1H), 7.30-7.25 (m, 2H), 7.10-7.07 (m, 1H).  $^{13}\text{C}$  NMR (100 MHz)  $\delta$  153.7, 150.1, 142.6, 136.2, 134.3, 133.3, 130.9, 129.9, 129.4, 128.98, 128.95, 128.5, 127.9, 127.6, 126.7, 125.8, 124.8, 124.5, 124.2, 121.4, 120.1, 119.9, 117.7, 116.5. HRMS (ESI) calculated for  $\text{C}_{28}\text{H}_{17}\text{ClO}$   $[\text{M}+\text{H}]^+$  requires 405.1046, found 405.1033.

General procedure of the synthesis of indeno[1,2-*c*]chromenes via a palladium-catalyzed reaction of 2-alkynylbromobenzenes with water

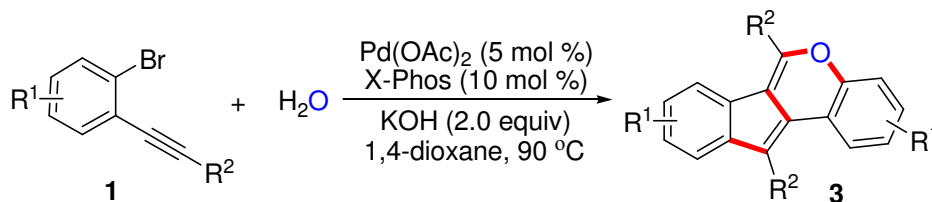

To a mixture of Pd(OAc)<sub>2</sub> (0.02 mmol, 5 mol %), X-Phos (0.04 mmol, 10 mol %), KOH (0.8 mmol), and 2-alkynylhalobenzene **1** (0.4 mmol) in 1,4-dioxane (2.0 mL) was added water (1.0 mmol). The mixture was heated at 90 °C. After completion of the reaction as indicated by TLC, the solvent was diluted by EtOAc (10 mL), washed with saturated brine (2 x 10 mL), and dried by Na<sub>2</sub>SO<sub>4</sub>. Evaporation the solvent followed by purification on silica gel provided the product **3**.

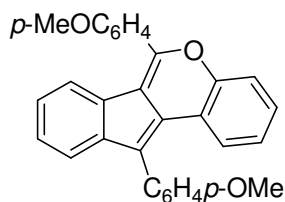

6,11-Bis(4-methoxyphenyl)indeno[1,2-*c*]chromene (**3t**). <sup>1</sup>H NMR (400 MHz, CDCl<sub>3</sub>) δ 7.83 (d, *J* = 7.8 Hz, 2H), 7.73-7.71 (m, 1H), 7.61-7.59 (m, 1H), 7.49 (d, *J* = 8.2 Hz, 2H), 7.44-7.42 (m, 1H), 7.38-7.36 (m, 1H), 7.29 (d, *J* = 6.9 Hz, 2H), 7.12-7.05 (m, 6H), 3.93 (s, 3H), 3.92 (s, 3H). <sup>13</sup>C NMR (100 MHz, CDCl<sub>3</sub>) δ 161.3, 158.9, 152.5, 150.2, 144.5, 131.1, 129.9, 128.8, 127.5, 126.5, 126.1, 125.9, 124.8, 124.1, 123.8, 122.6, 121.4, 120.3, 119.3, 117.6, 114.3, 114.1, 113.8, 55.4, 55.3. HRMS (ESI) calcd for C<sub>30</sub>H<sub>23</sub>O: 431.1647 (M + H<sup>+</sup>), found: 431.1640.

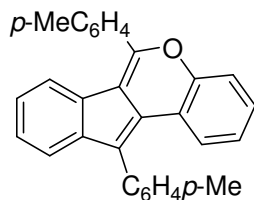

6,11-Di-*p*-tolylindeno[1,2-*c*]chromene (**3u**).  $^1\text{H}$  NMR (400 MHz,  $\text{CDCl}_3$ )  $\delta$  7.78-7.72 (m, 3H), 7.56 (d,  $J = 7.8$  Hz, 1H), 7.48-7.45 (m, 2H), 7.42-7.39 (m, 2H), 7.36-7.35 (m, 3H), 7.33-7.30 (m, 3H), 7.09-7.06 (m, 2H), 2.51 (s, 3H), 2.49 (s, 3H).  $^{13}\text{C}$  NMR (100 MHz,  $\text{CDCl}_3$ )  $\delta$  152.8, 150.2, 144.4, 140.7, 137.0, 133.6, 131.0, 129.8, 129.6, 129.4, 128.4, 127.6, 126.5, 126.4, 124.9, 124.1, 123.7, 122.7, 121.5, 120.3, 119.3, 117.6, 117.1, 21.6, 21.5. HRMS (ESI) calcd for  $\text{C}_{30}\text{H}_{23}\text{O}$ : 399.1749 ( $\text{M} + \text{H}^+$ ), found: 399.1758.

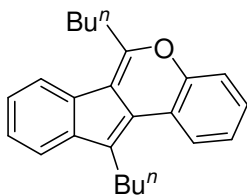

6,11-Dibutylindeno[1,2-*c*]chromene (**3v**).  $^1\text{H}$  NMR (400 MHz,  $\text{CDCl}_3$ )  $\delta$  8.11 (s, 1H), 7.90 (d,  $J = 7.4$  Hz, 1H), 7.64 (d,  $J = 8.0$  Hz, 1H), 7.44-7.41 (m, 2H), 7.34-7.32 (m, 3H), 3.17-3.11 (m, 4H), 1.91-1.88 (m, 2H), 1.74-1.73 (m, 2H), 1.57-1.53 (m, 4H), 1.25 (m, 4H), 1.00 (t,  $J = 7.1$  Hz, 6H).  $^{13}\text{C}$  NMR (100 MHz,  $\text{CDCl}_3$ )  $\delta$  155.5, 149.9, 144.0, 130.1, 126.8, 125.7, 125.0, 124.3, 122.6, 122.2, 121.5, 121.2, 118.4, 117.5, 116.2, 32.1, 31.3, 29.6, 26.1, 23.2, 22.7, 14.2, 13.9. HRMS (ESI) calcd for  $\text{C}_{24}\text{H}_{27}\text{O}$ : 331.2062 ( $\text{M} + \text{H}^+$ ), found: 331.2066.

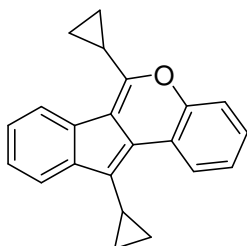

6,11-Dicyclopropylindeno[1,2-*c*]chromene (**3w**).  $^1\text{H}$  NMR (400 MHz,  $\text{CDCl}_3$ )  $\delta$  8.67-8.66 (m, 1H), 8.07 (d,  $J = 7.3$  Hz, 1H), 7.93 (d,  $J = 7.3$  Hz, 1H), 7.45-7.42 (m, 1H), 7.33-7.29 (m, 4H), 2.76-2.75 (m, 1H), 2.08-2.07 (m, 1H), 1.39-1.28 (m, 2H), 1.24-1.18 (m, 4H), 0.75-0.74 (m, 2H).  $^{13}\text{C}$  NMR (100 MHz,  $\text{CDCl}_3$ )  $\delta$  154.9, 149.5, 144.3, 130.2, 126.9, 126.7, 125.4, 125.2, 124.2, 123.9, 122.4, 121.5, 120.9, 119.9, 116.8, 116.2, 12.8, 8.2, 7.7. HRMS (ESI) calcd for  $\text{C}_{22}\text{H}_{19}\text{O}$ : 299.1436 ( $\text{M} + \text{H}^+$ ), found: 299.1440.

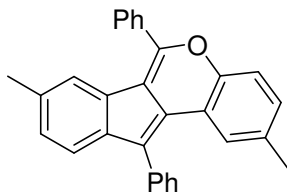

2,8-Dimethyl-6,11-diphenylindeno[1,2-*c*]chromene (**3x**).  $^1\text{H}$  NMR (400 MHz,  $\text{CDCl}_3$ )  $\delta$  7.66 (d,  $J = 7.8$  Hz, 3H), 7.52-7.50 (m, 4H), 7.46-7.44 (m, 3H), 7.02 (m, 2H), 6.89 (d,  $J = 7.3$  Hz, 2H), 6.69 (d,  $J = 7.3$  Hz, 2H), 2.19 (s, 3H), 2.16 (s, 3H).  $^{13}\text{C}$  NMR (100 MHz,  $\text{CDCl}_3$ )  $\delta$  147.0, 142.4, 140.5, 137.3, 135.5, 134.1, 130.0, 130.3, 129.6, 129.1, 128.6, 128.5, 128.0, 127.9, 127.4, 127.3, 127.0, 122.8, 122.1, 119.0, 117.4, 110.5, 21.4. HRMS (ESI) calcd for  $\text{C}_{30}\text{H}_{23}\text{O}$ : 399.1749 ( $\text{M} + \text{H}^+$ ), found: 399.1764.

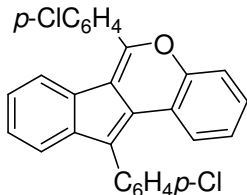

6,11-Bis(4-chlorophenyl)indeno[1,2-*c*]chromene (**3y**).  $^1\text{H}$  NMR (400 MHz,  $\text{CDCl}_3$ )  $\delta$  7.84 (d,  $J = 6.9$  Hz, 2H), 7.64-7.60 (m, 3H), 7.55-7.50 (m, 6H), 7.35-7.33 (m, 3H), 7.13-7.10 (m, 2H).  $^{13}\text{C}$  NMR (100 MHz,  $\text{CDCl}_3$ )  $\delta$  136.8, 135.0, 133.3, 132.1, 131.4, 131.0, 129.2, 128.0, 127.0, 125.4, 124.8, 124.5, 123.1, 121.4, 119.8, 119.2, 117.8. HRMS (ESI) calcd for  $\text{C}_{28}\text{H}_{17}\text{Cl}_2\text{O}$ : 439.0656 ( $\text{M} + \text{H}^+$ ), found: 439.0648.

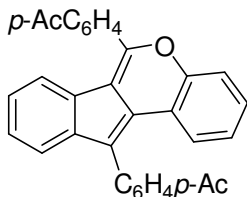

1,1'-(Indeno[1,2-*c*]chromene-6,11-diyl)bis(4,1-phenylene)diethanone (**3z**).  $^1\text{H}$  NMR (400 MHz,  $\text{CDCl}_3$ )  $\delta$  8.21-8.15 (m, 4H), 8.02-8.00 (m, 2H), 7.71-7.69 (m, 3H), 7.51-7.49 (m, 2H), 7.35 (m, 3H), 7.12 (m, 2H), 2.74 (s, 3H), 2.72 (s, 3H).  $^{13}\text{C}$  NMR (100 MHz,  $\text{CDCl}_3$ )  $\delta$  197.9, 197.4, 151.5, 150.0, 143.9, 141.9, 138.5, 137.9, 136.2, 130.3, 129.9, 129.4, 129.0, 128.7, 128.2, 127.2, 125.7, 124.8, 124.6, 124.3, 123.3, 121.5, 119.6, 119.2, 117.8, 26.8, 26.7. HRMS (ESI) calcd for  $\text{C}_{32}\text{H}_{23}\text{O}_3$ : 455.1647 ( $\text{M} + \text{H}^+$ ), found: 455.1662.

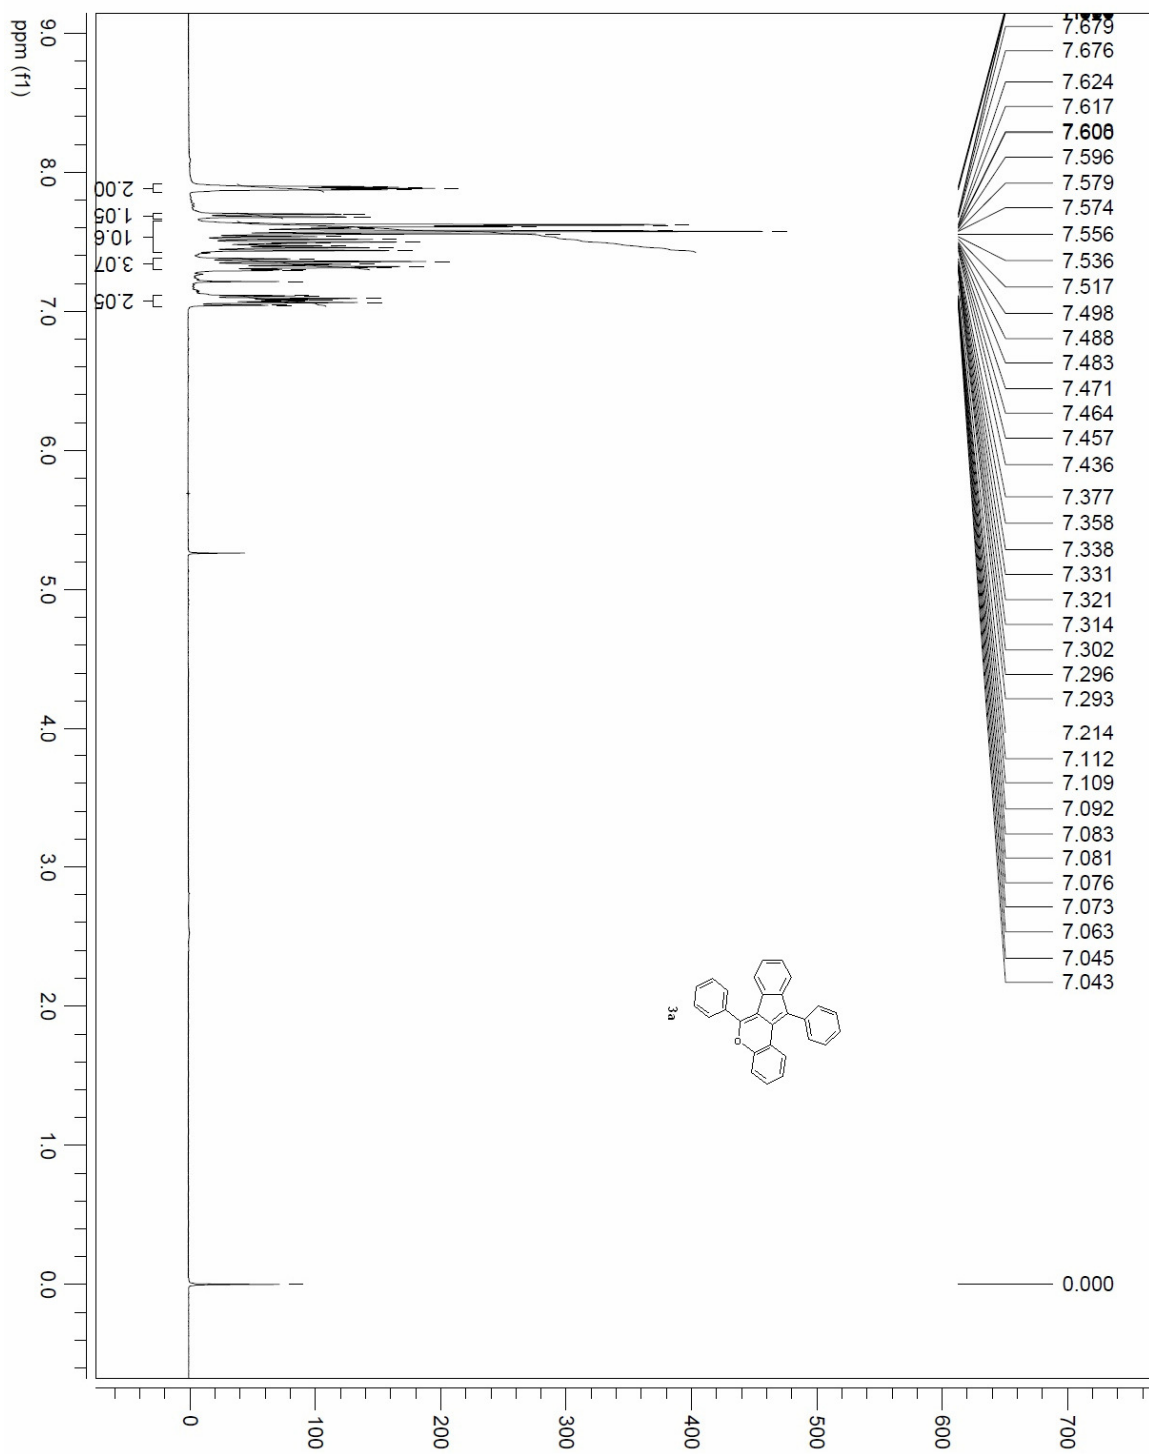

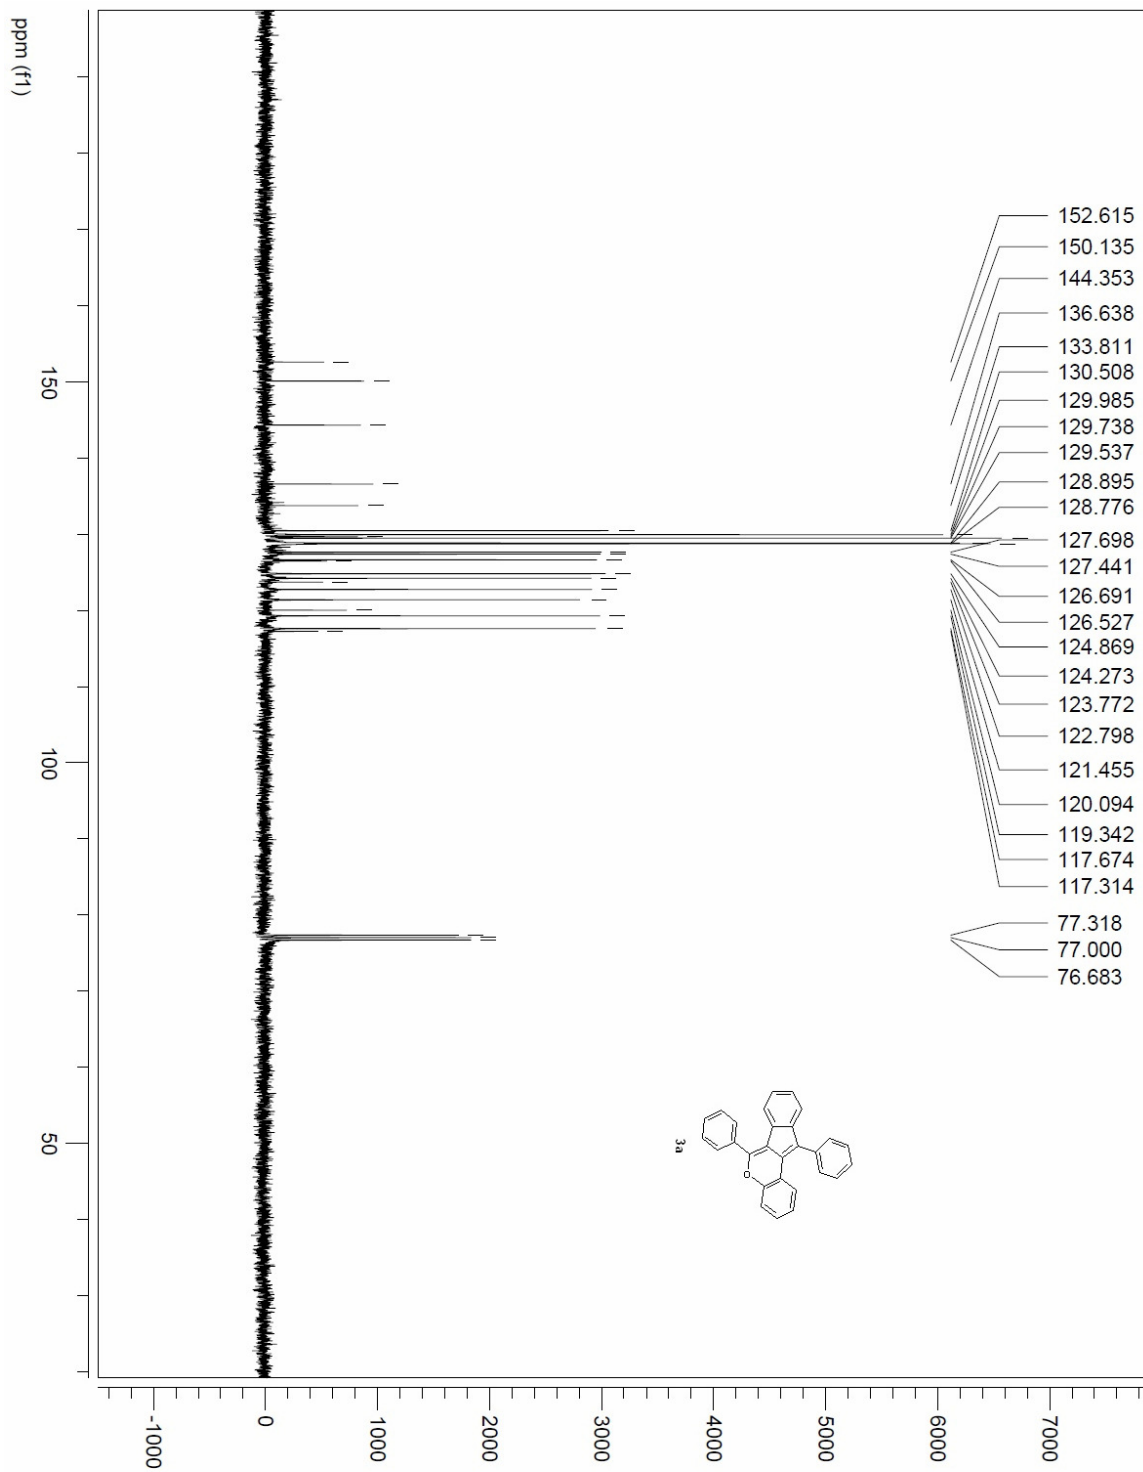

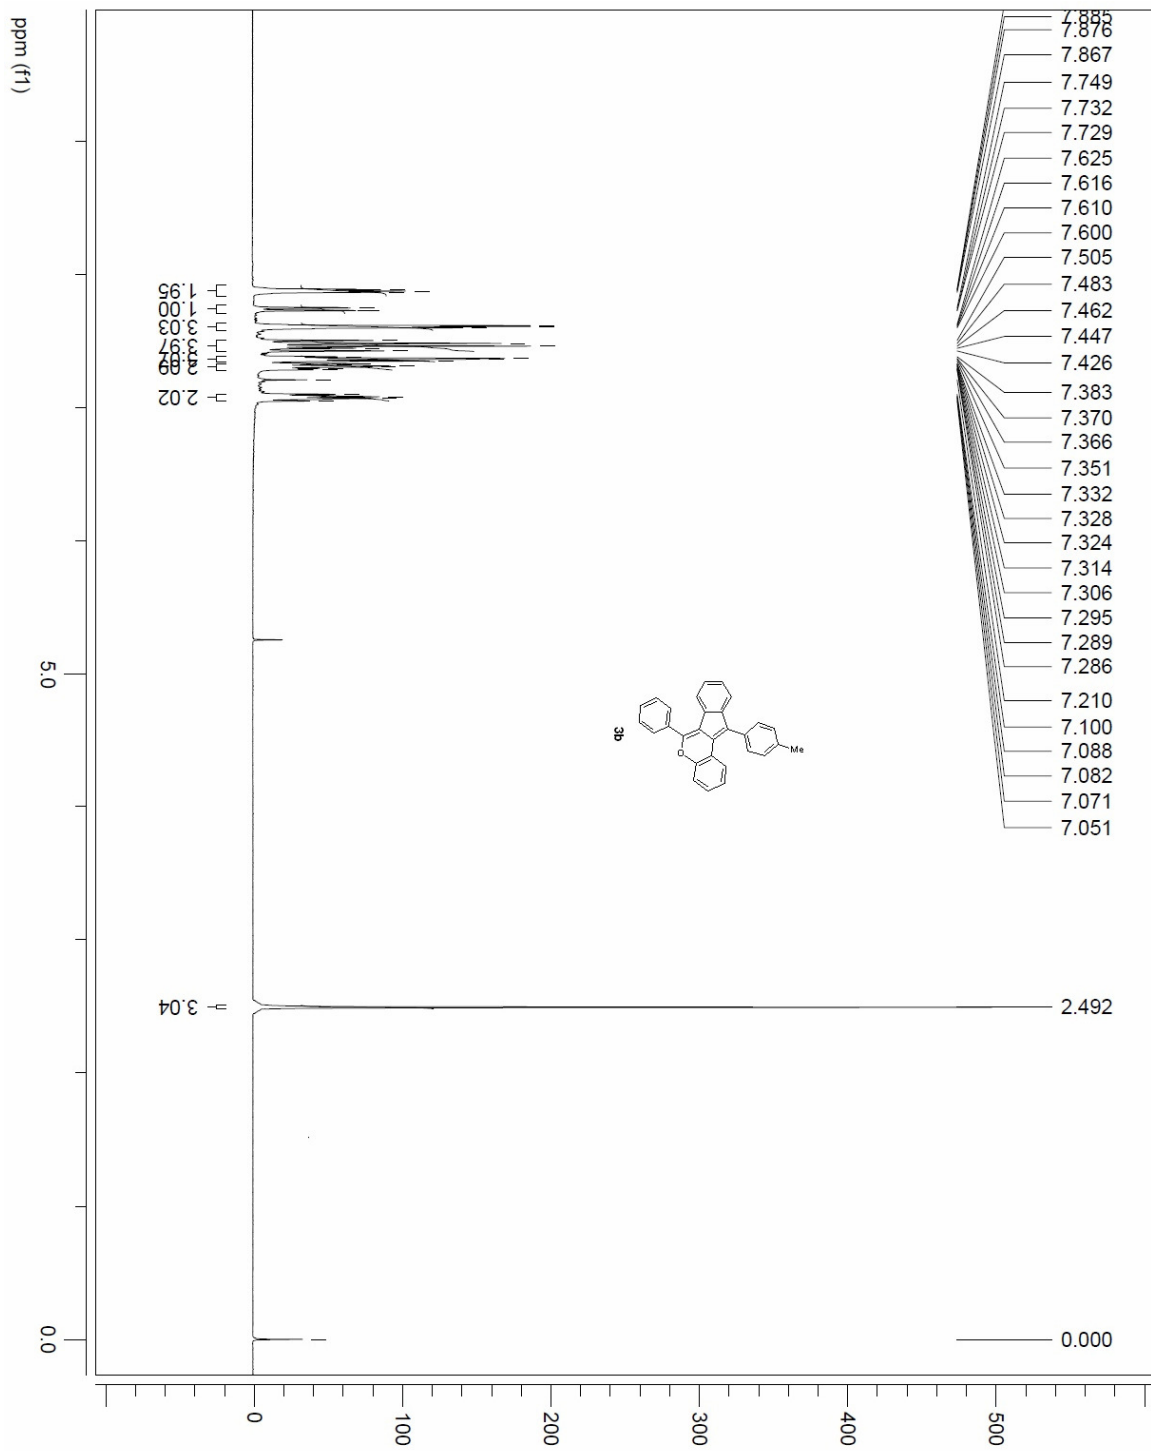

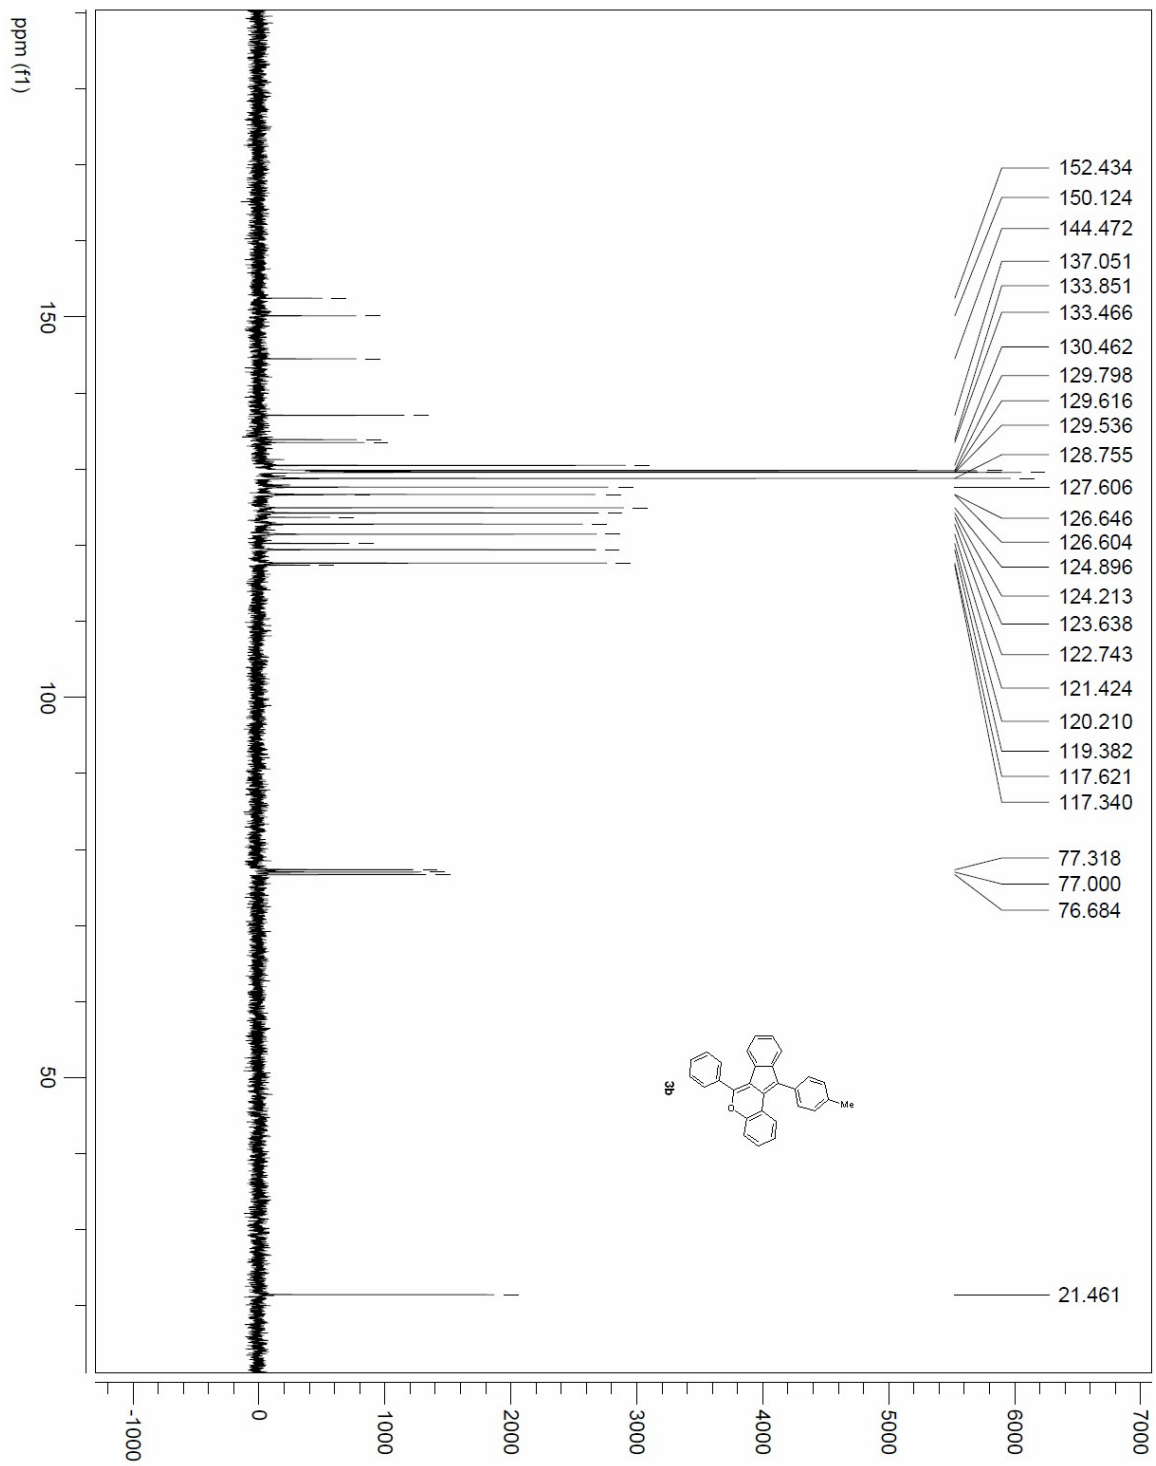



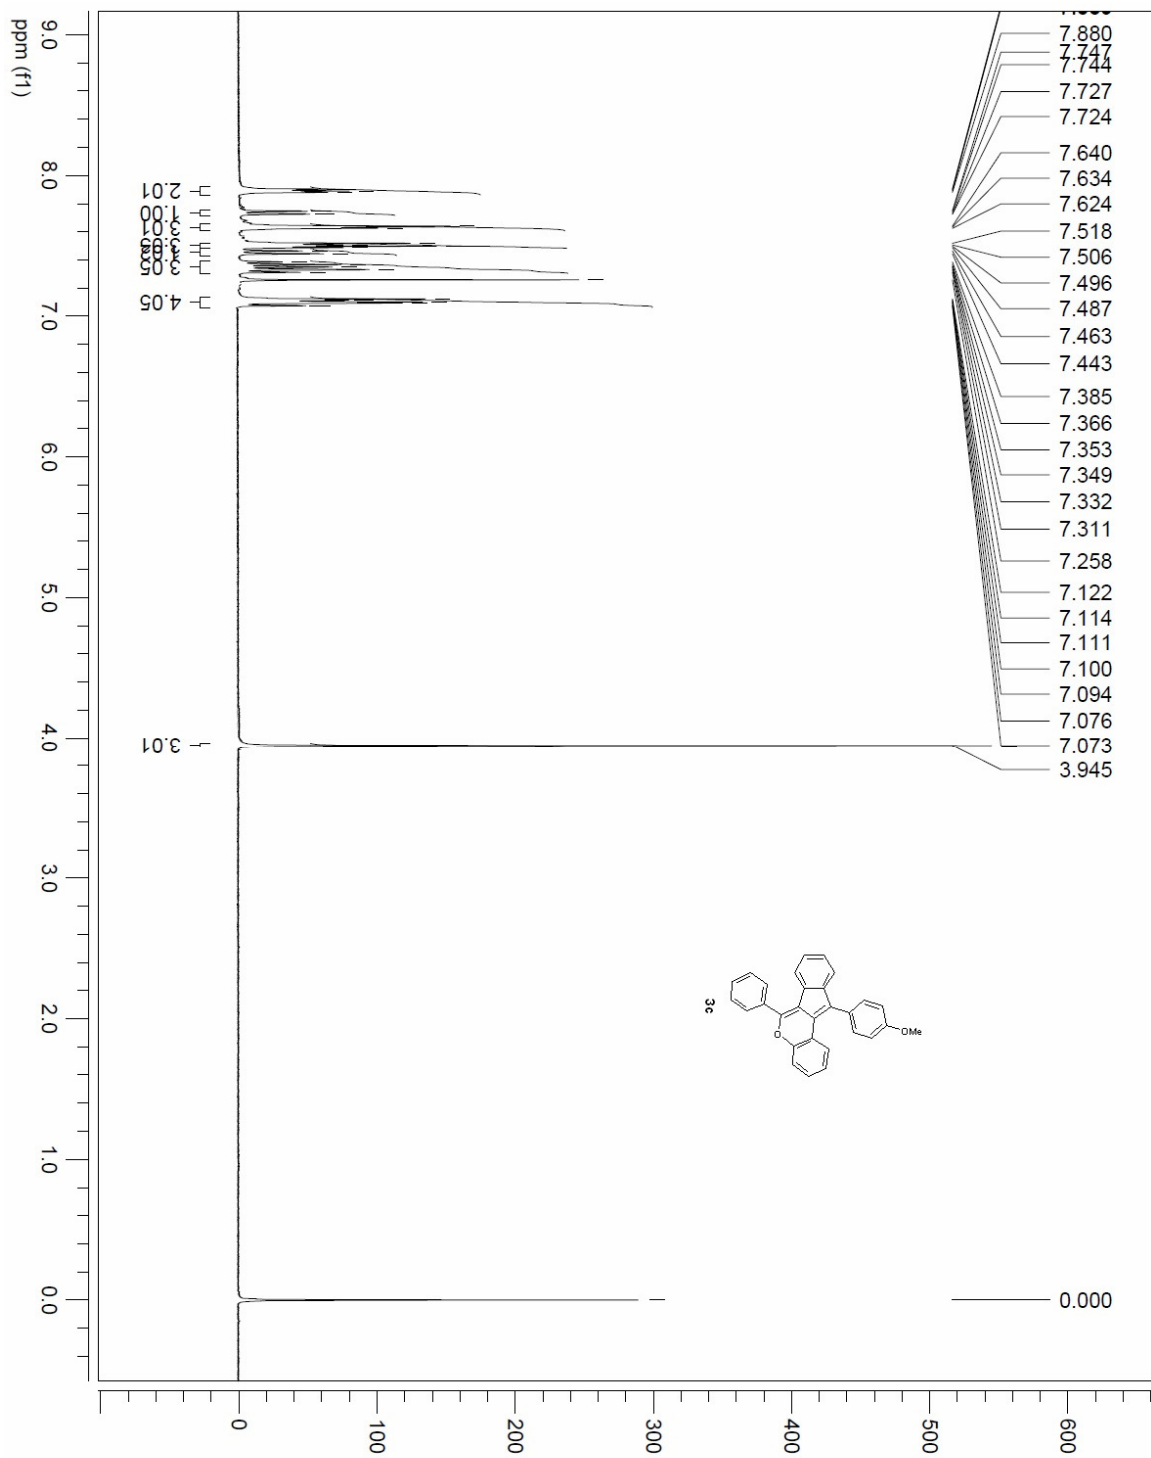

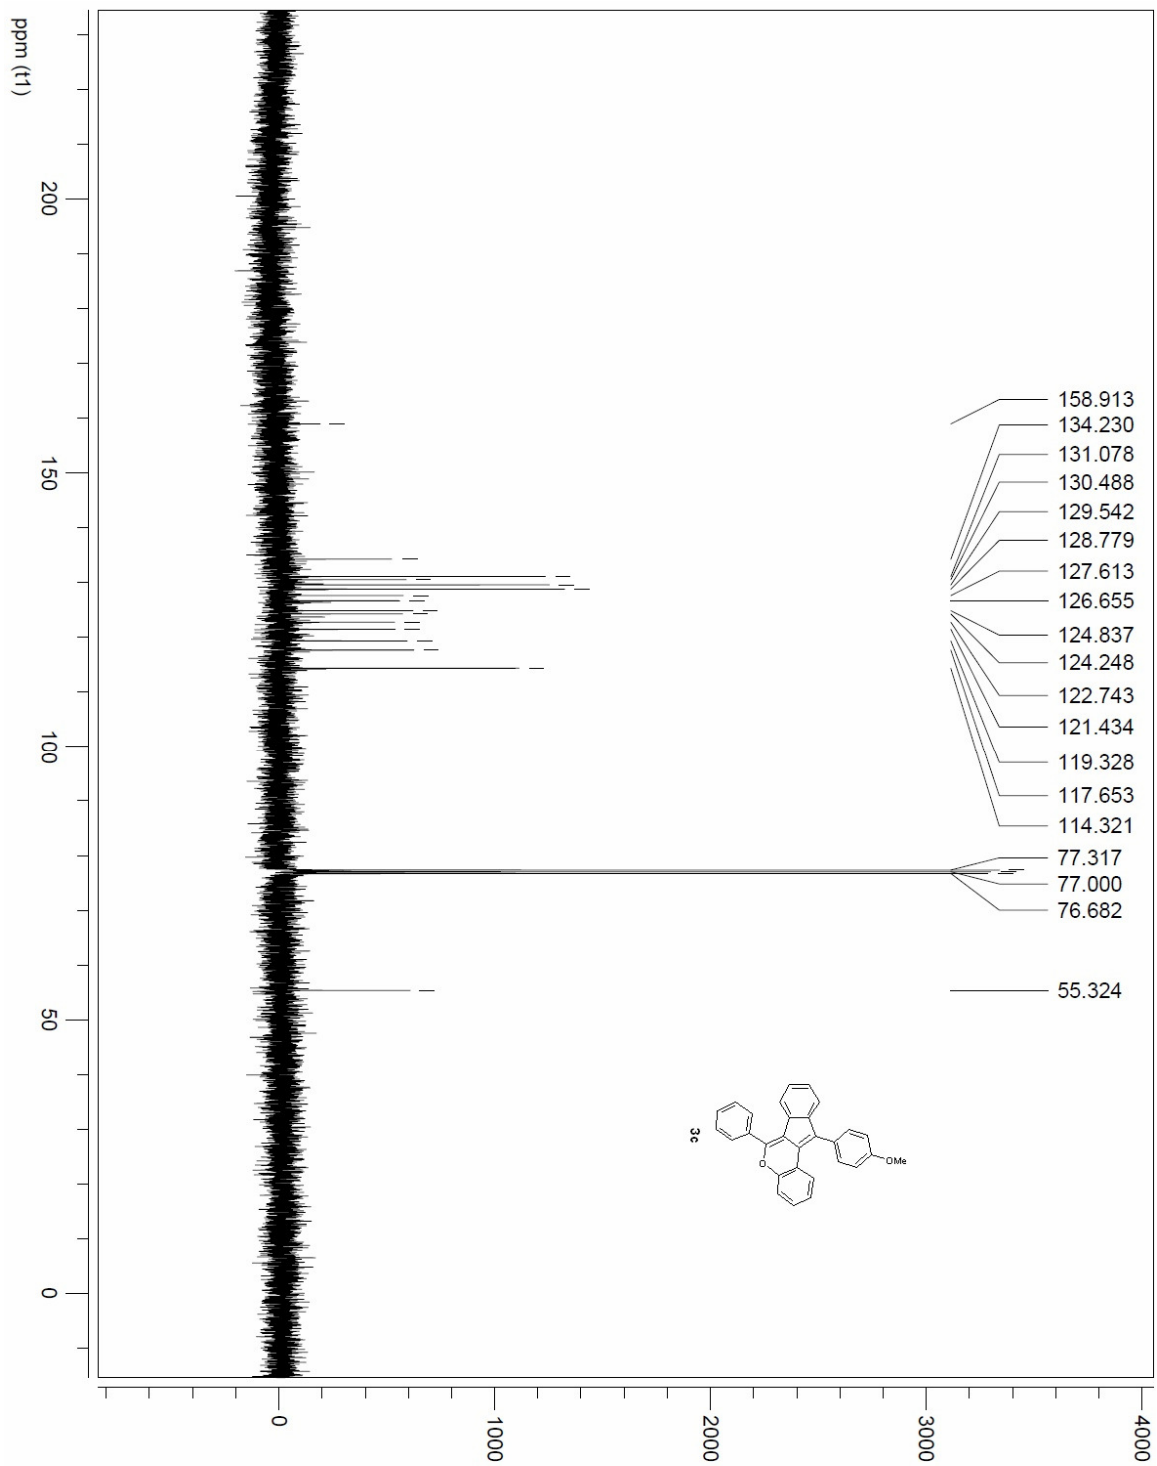

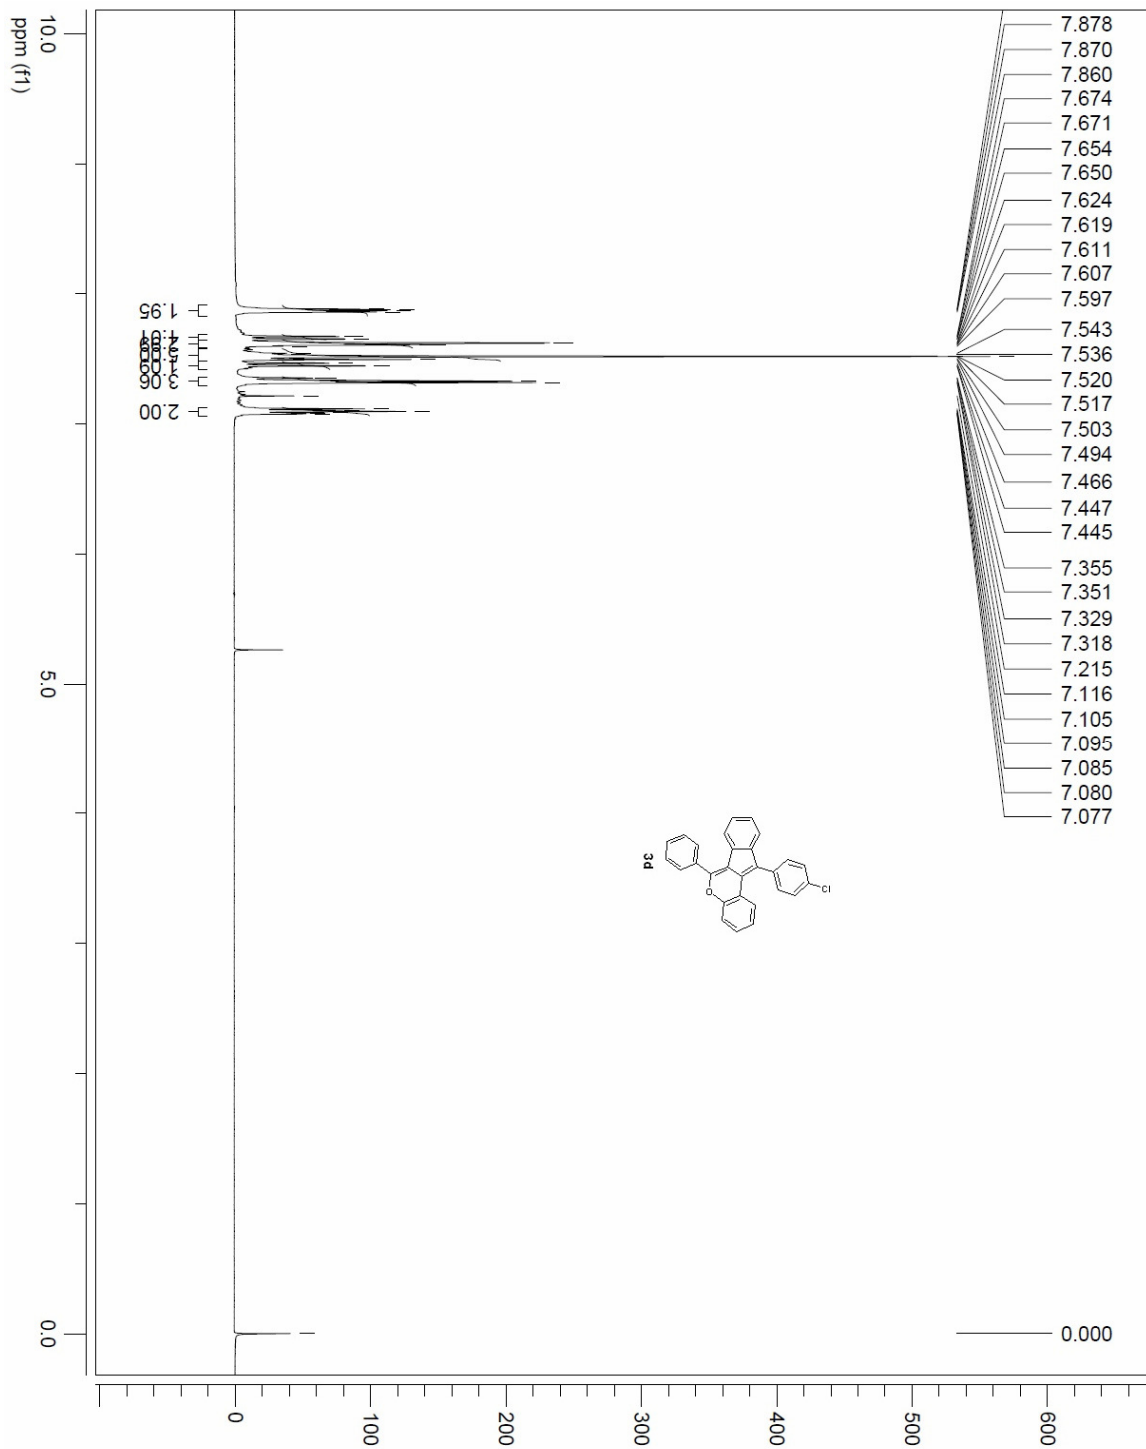

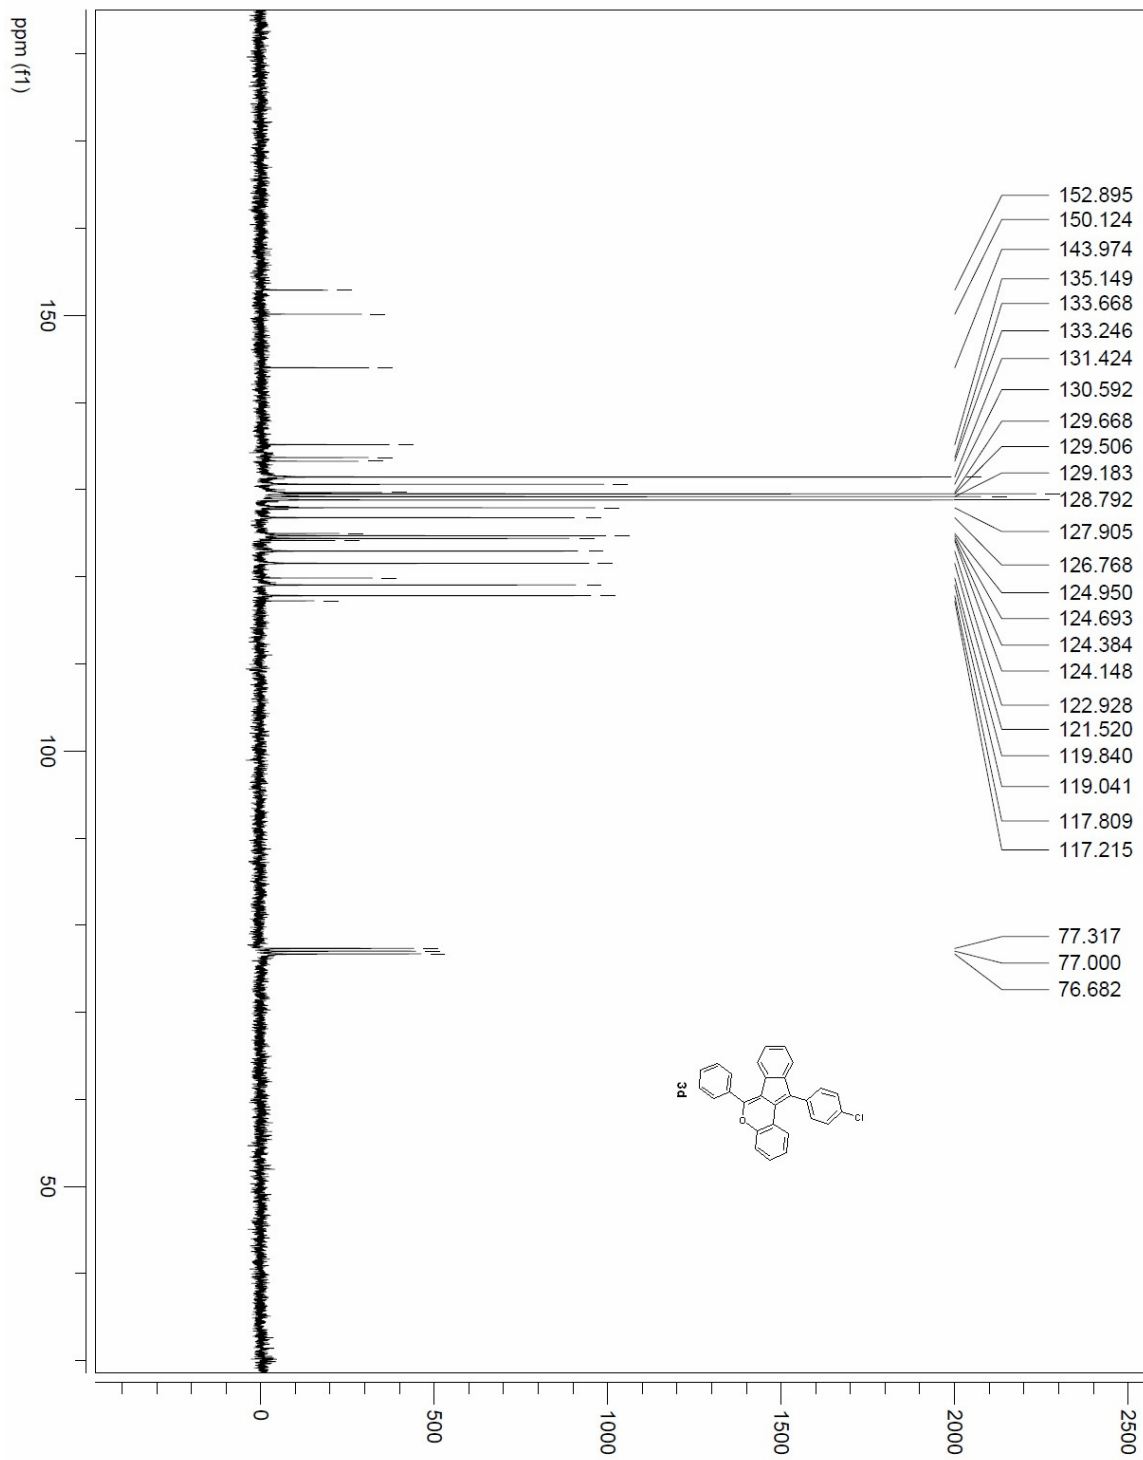

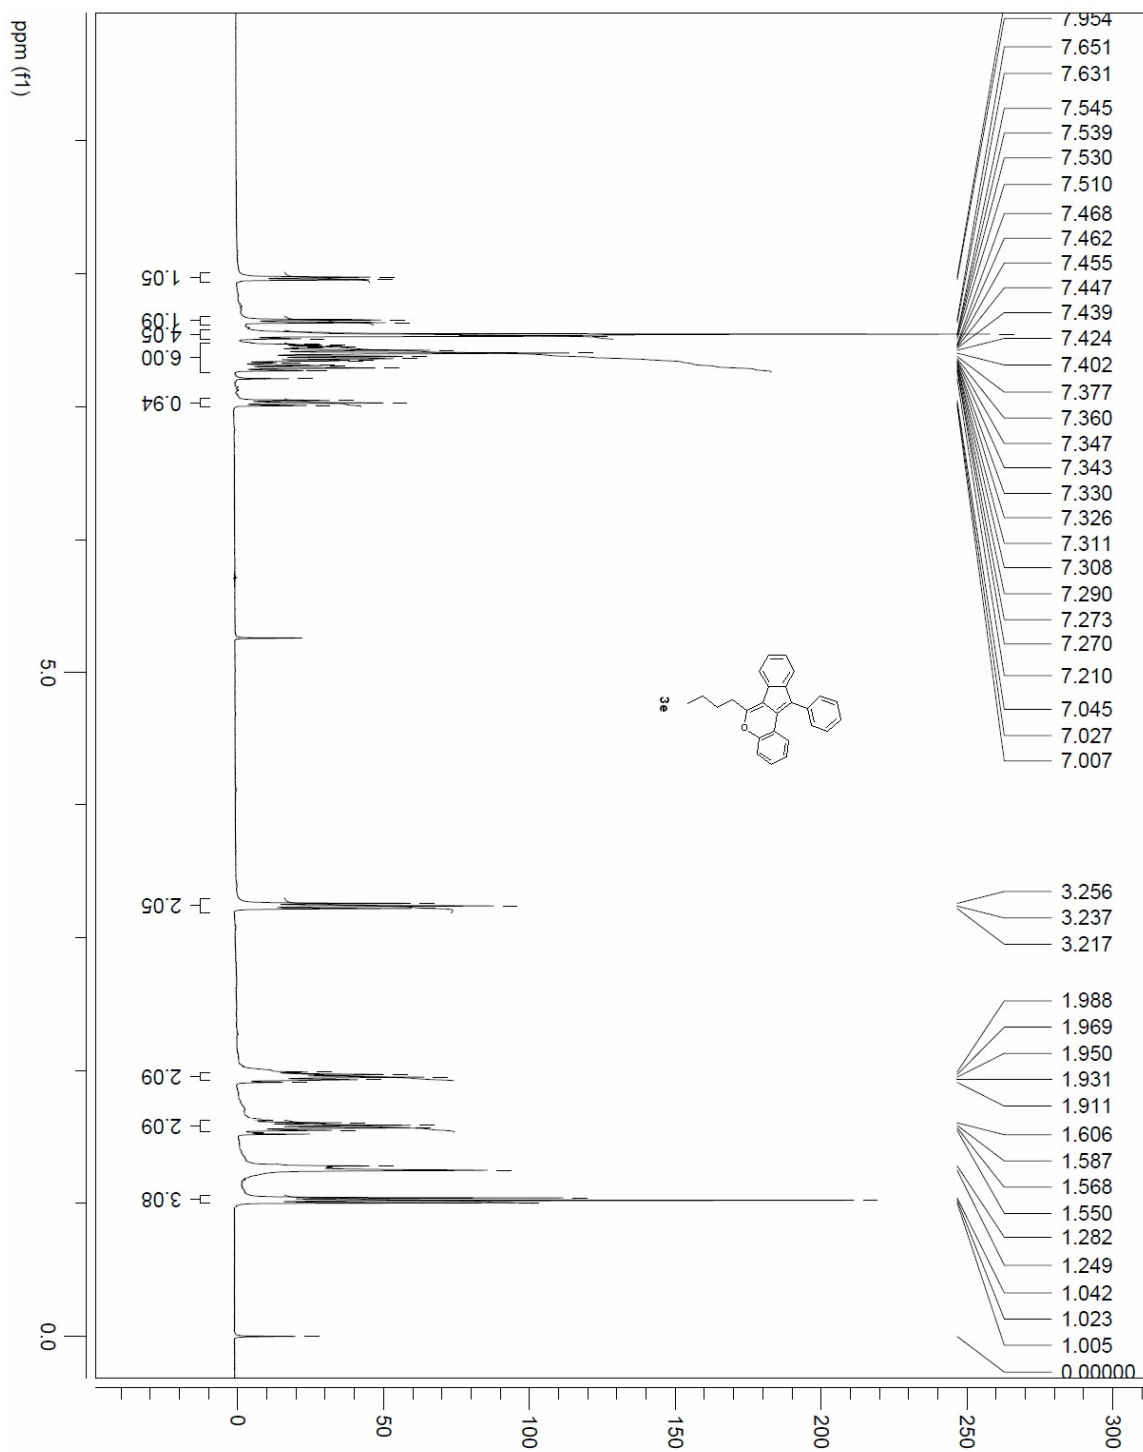

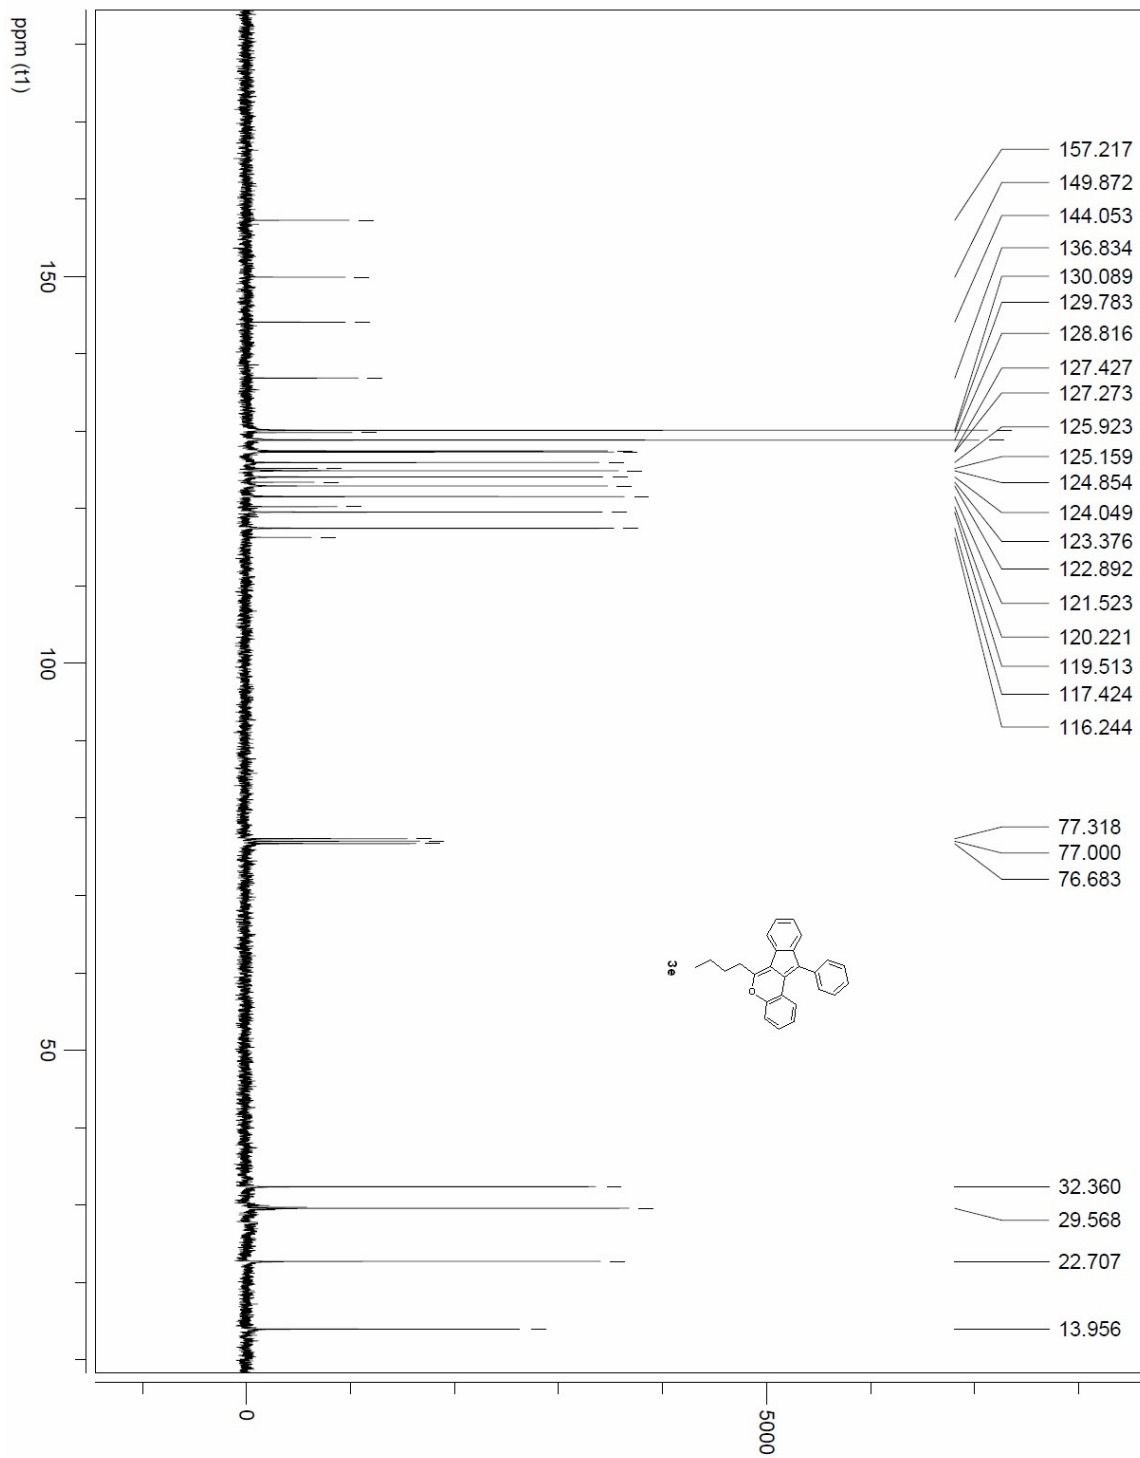

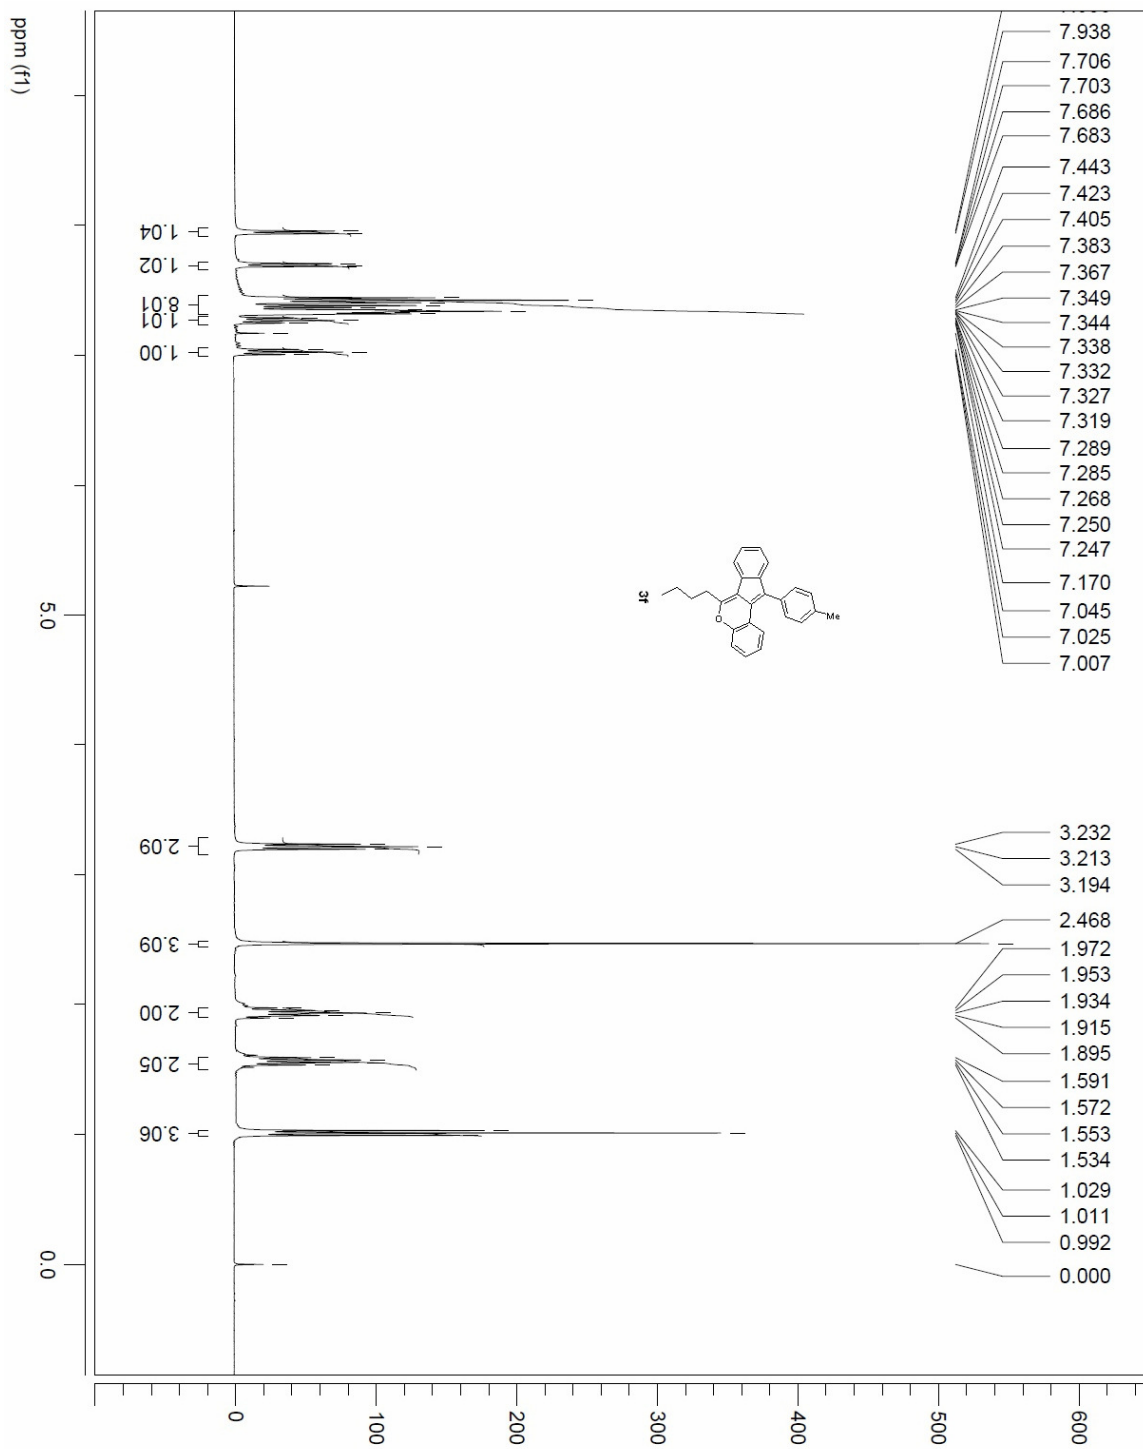

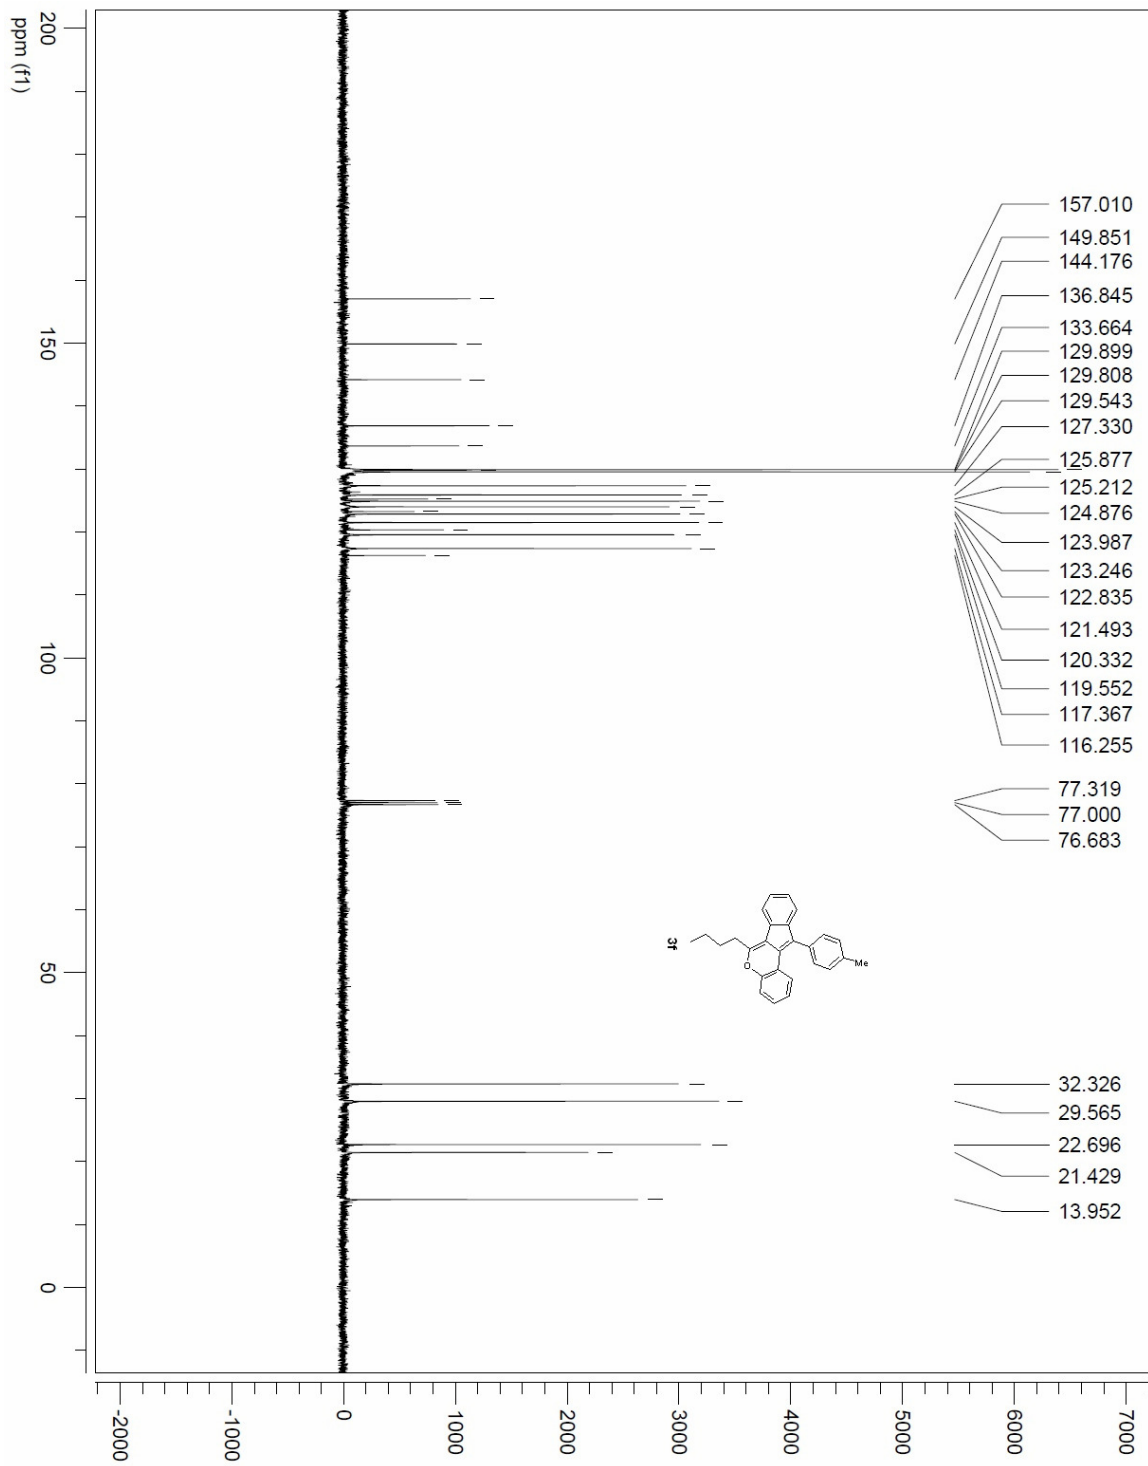



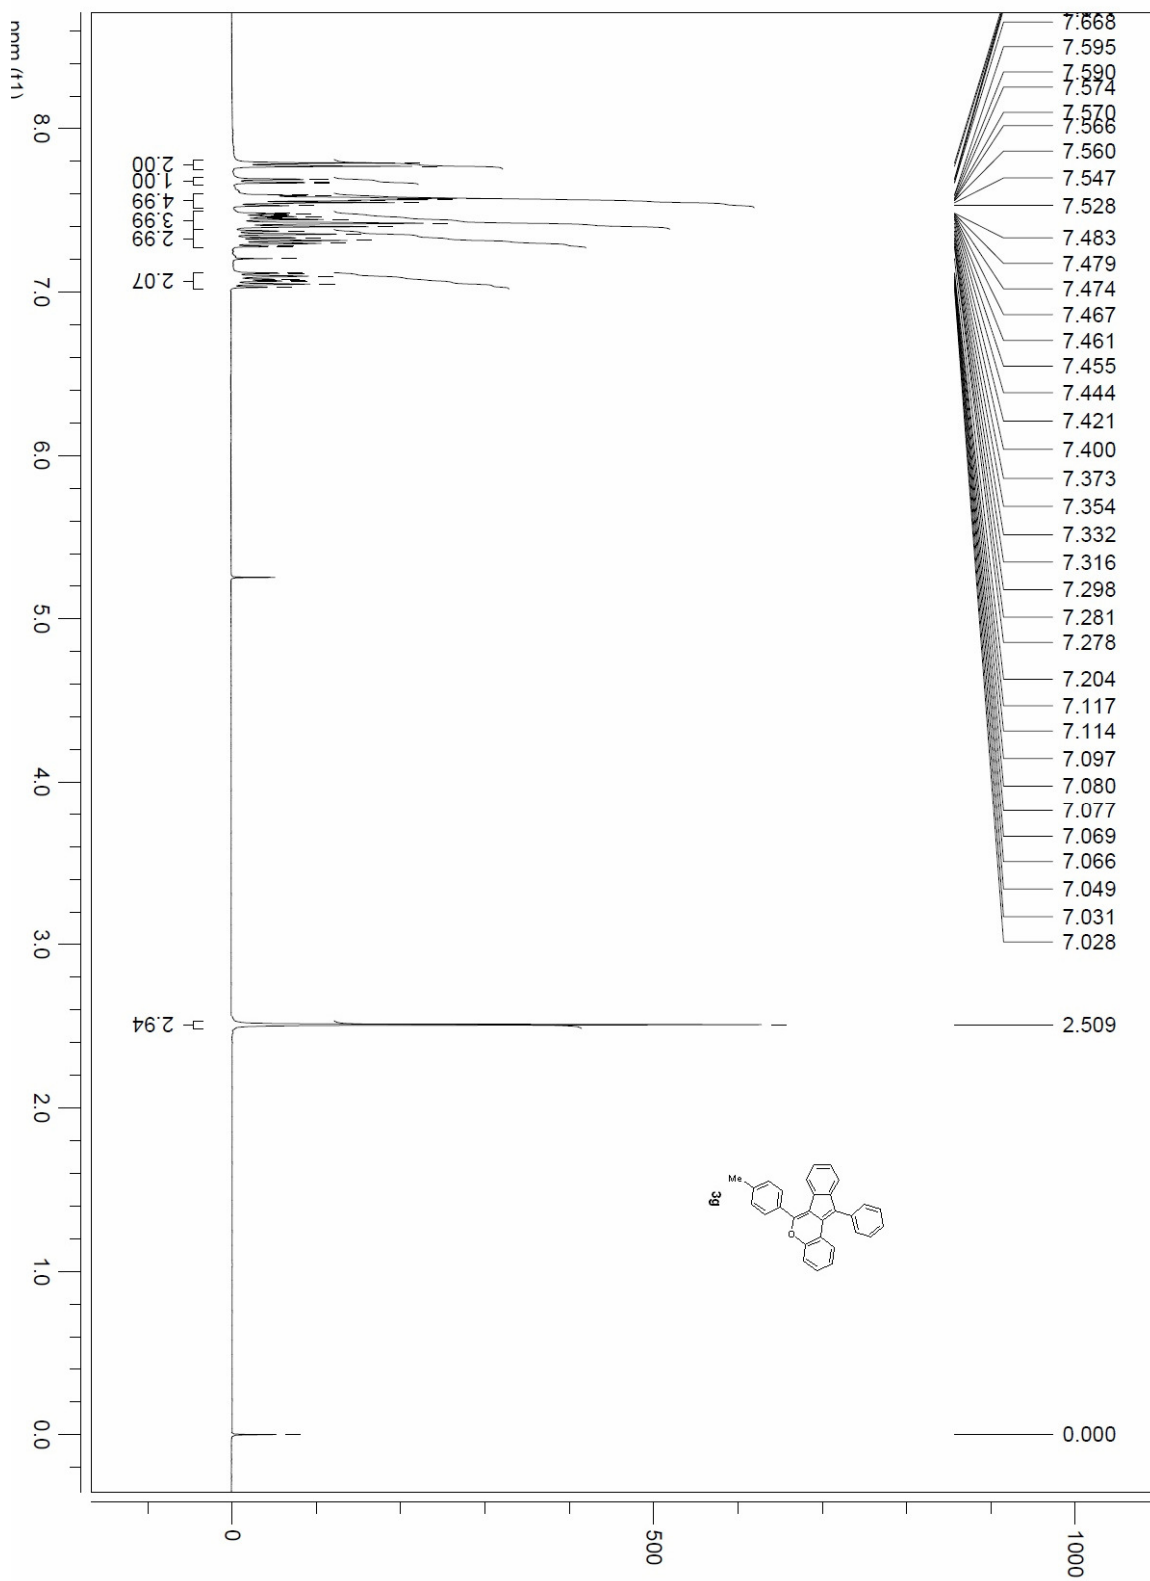

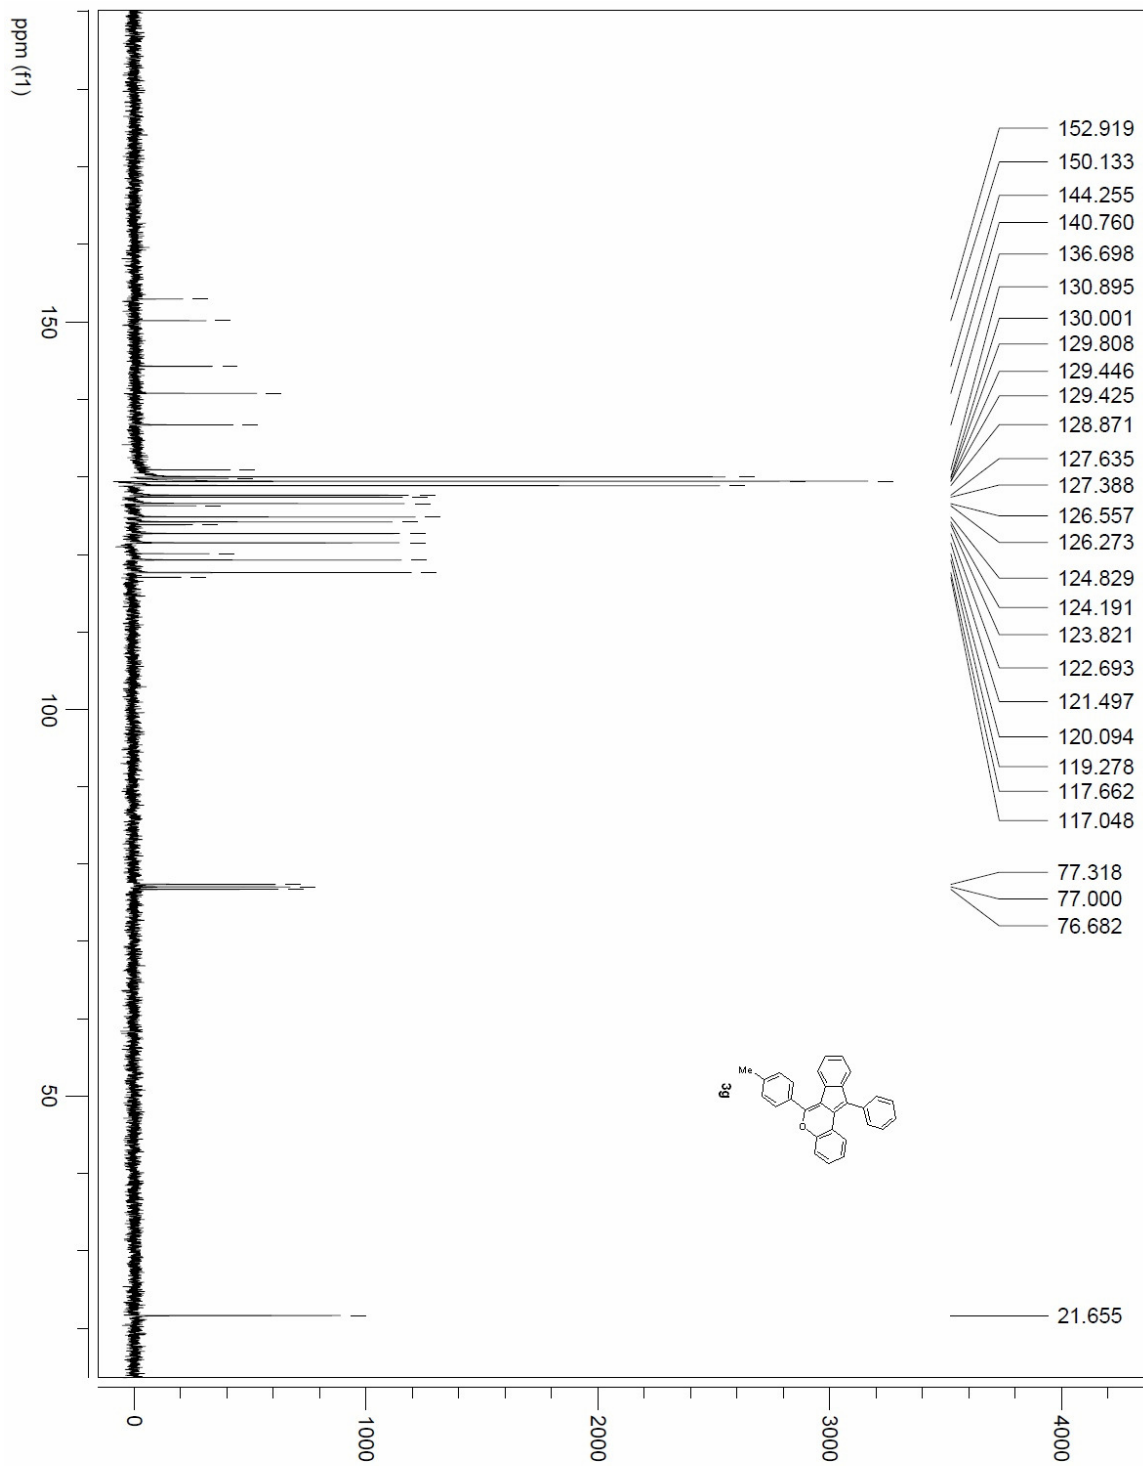

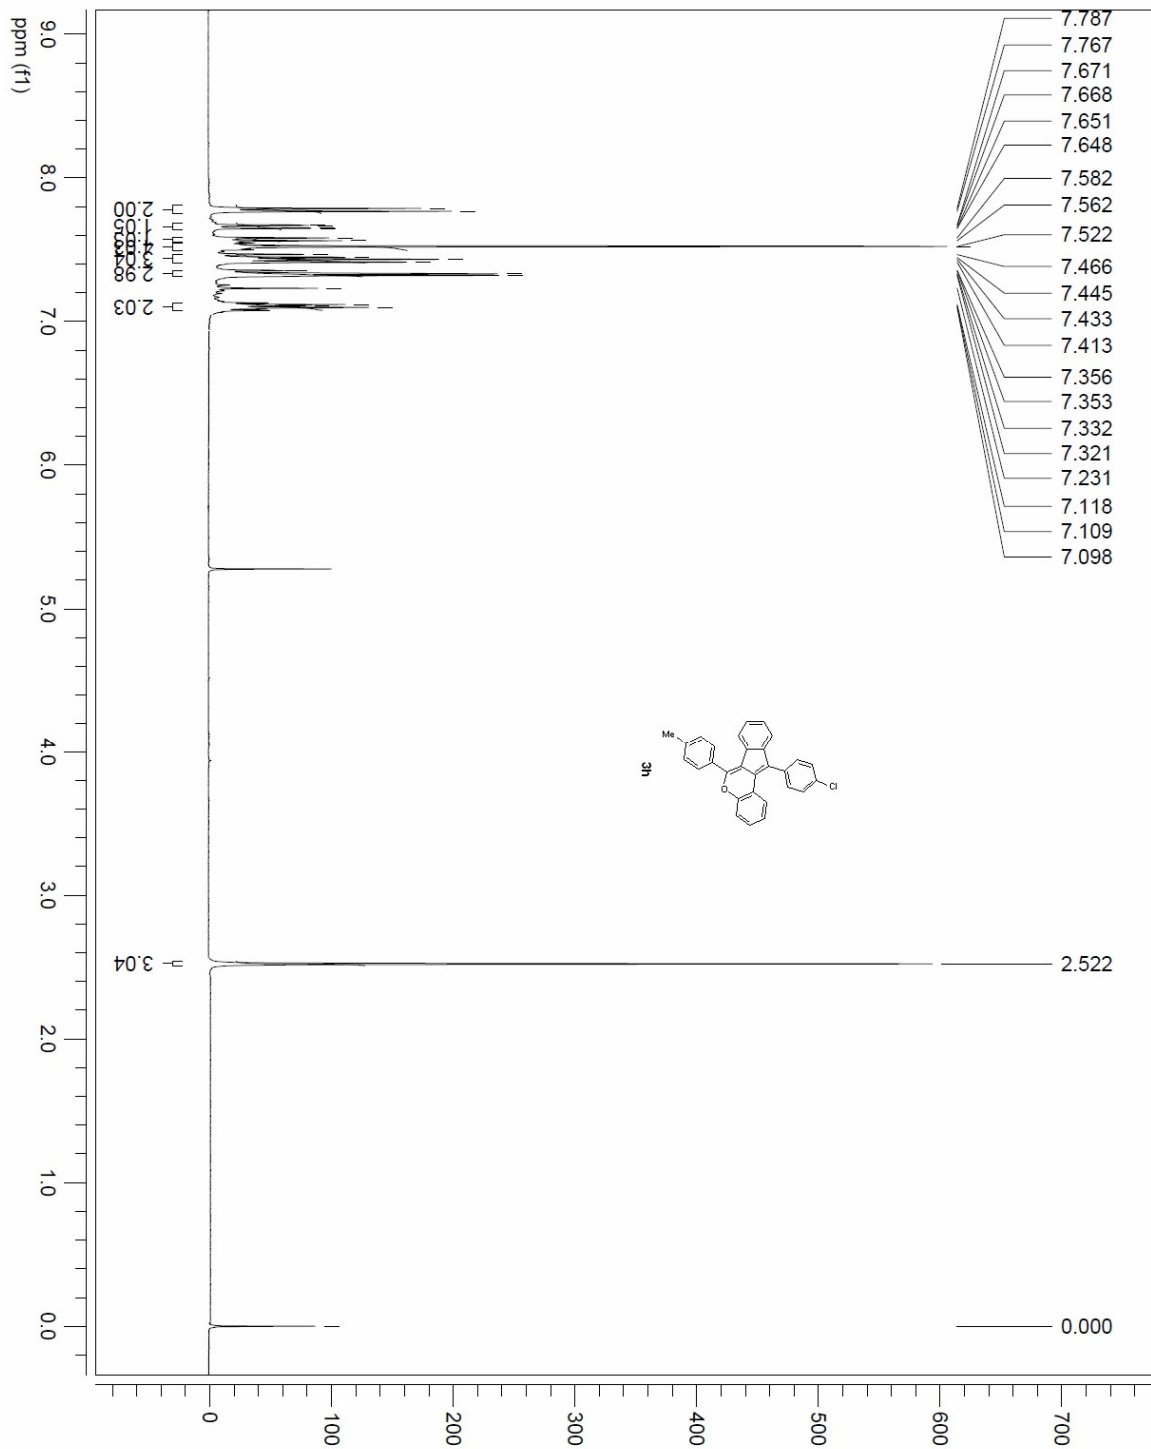

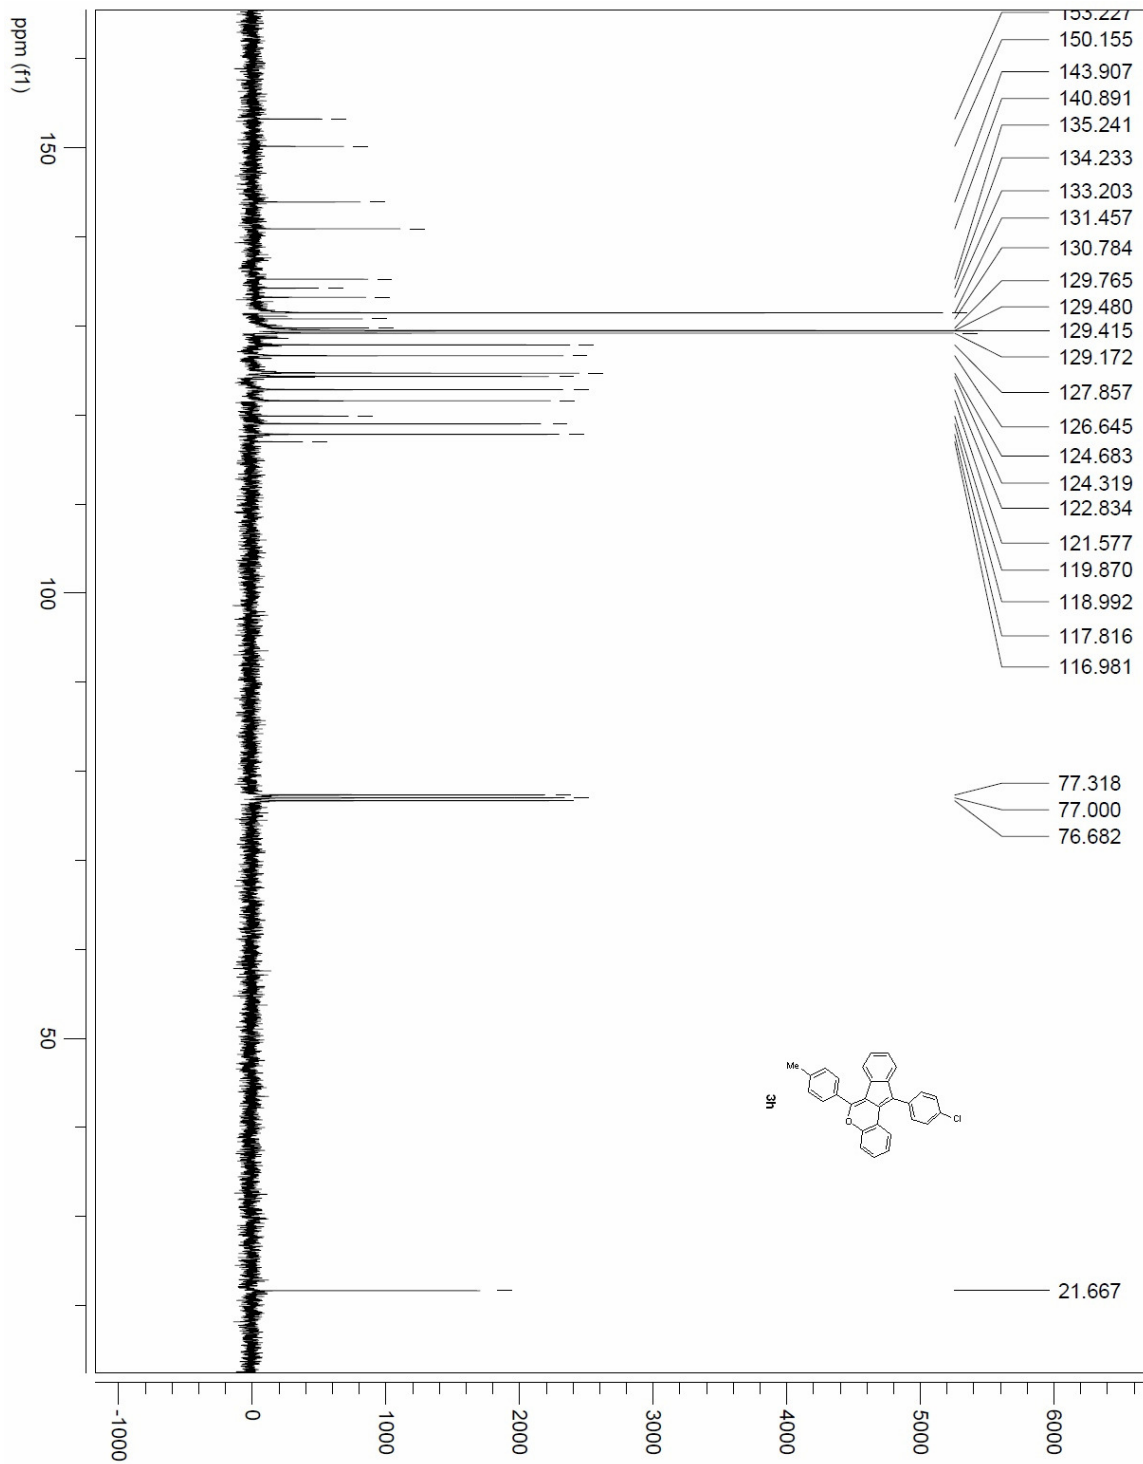

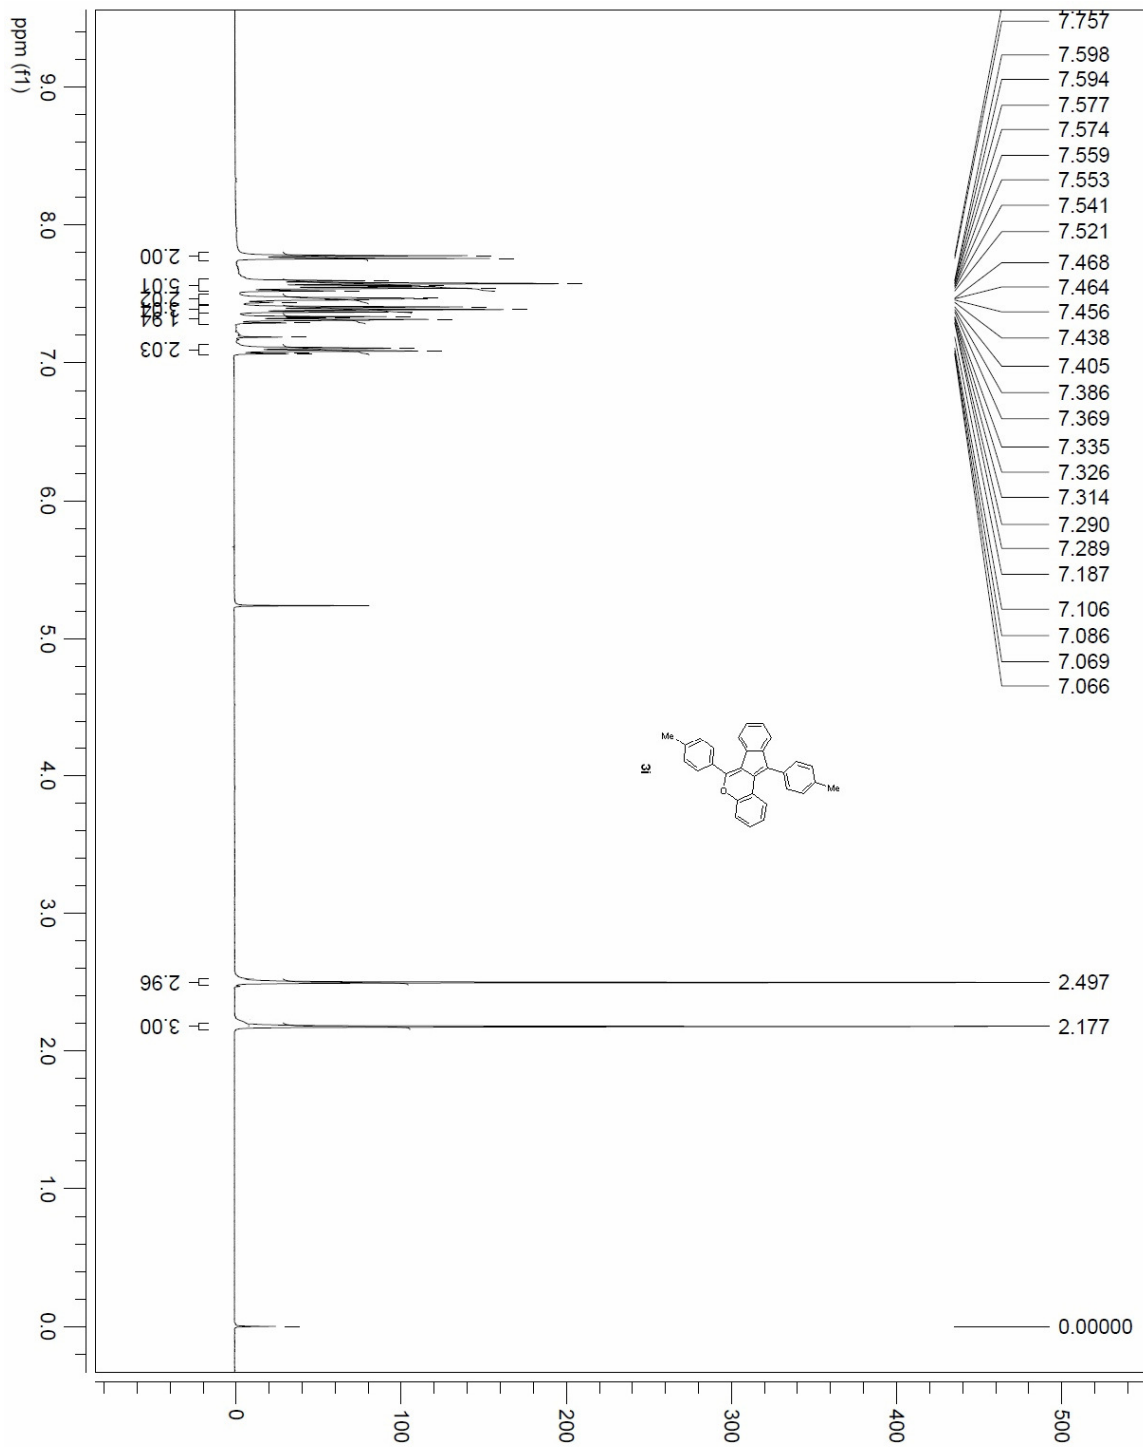

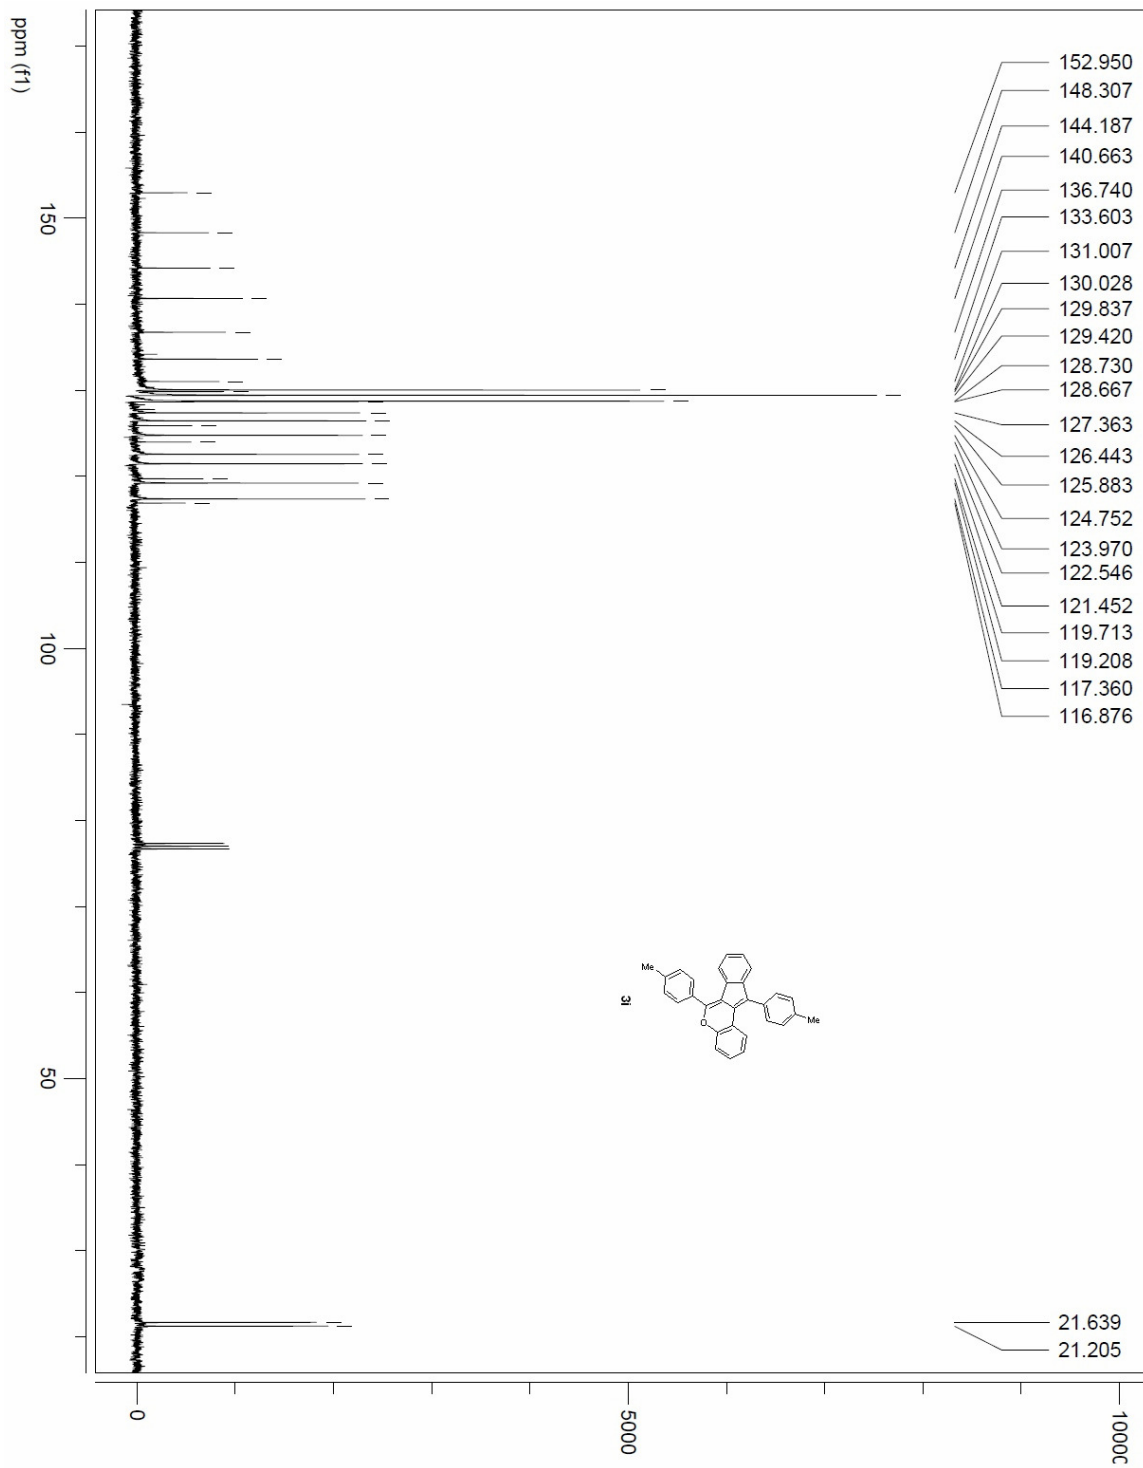

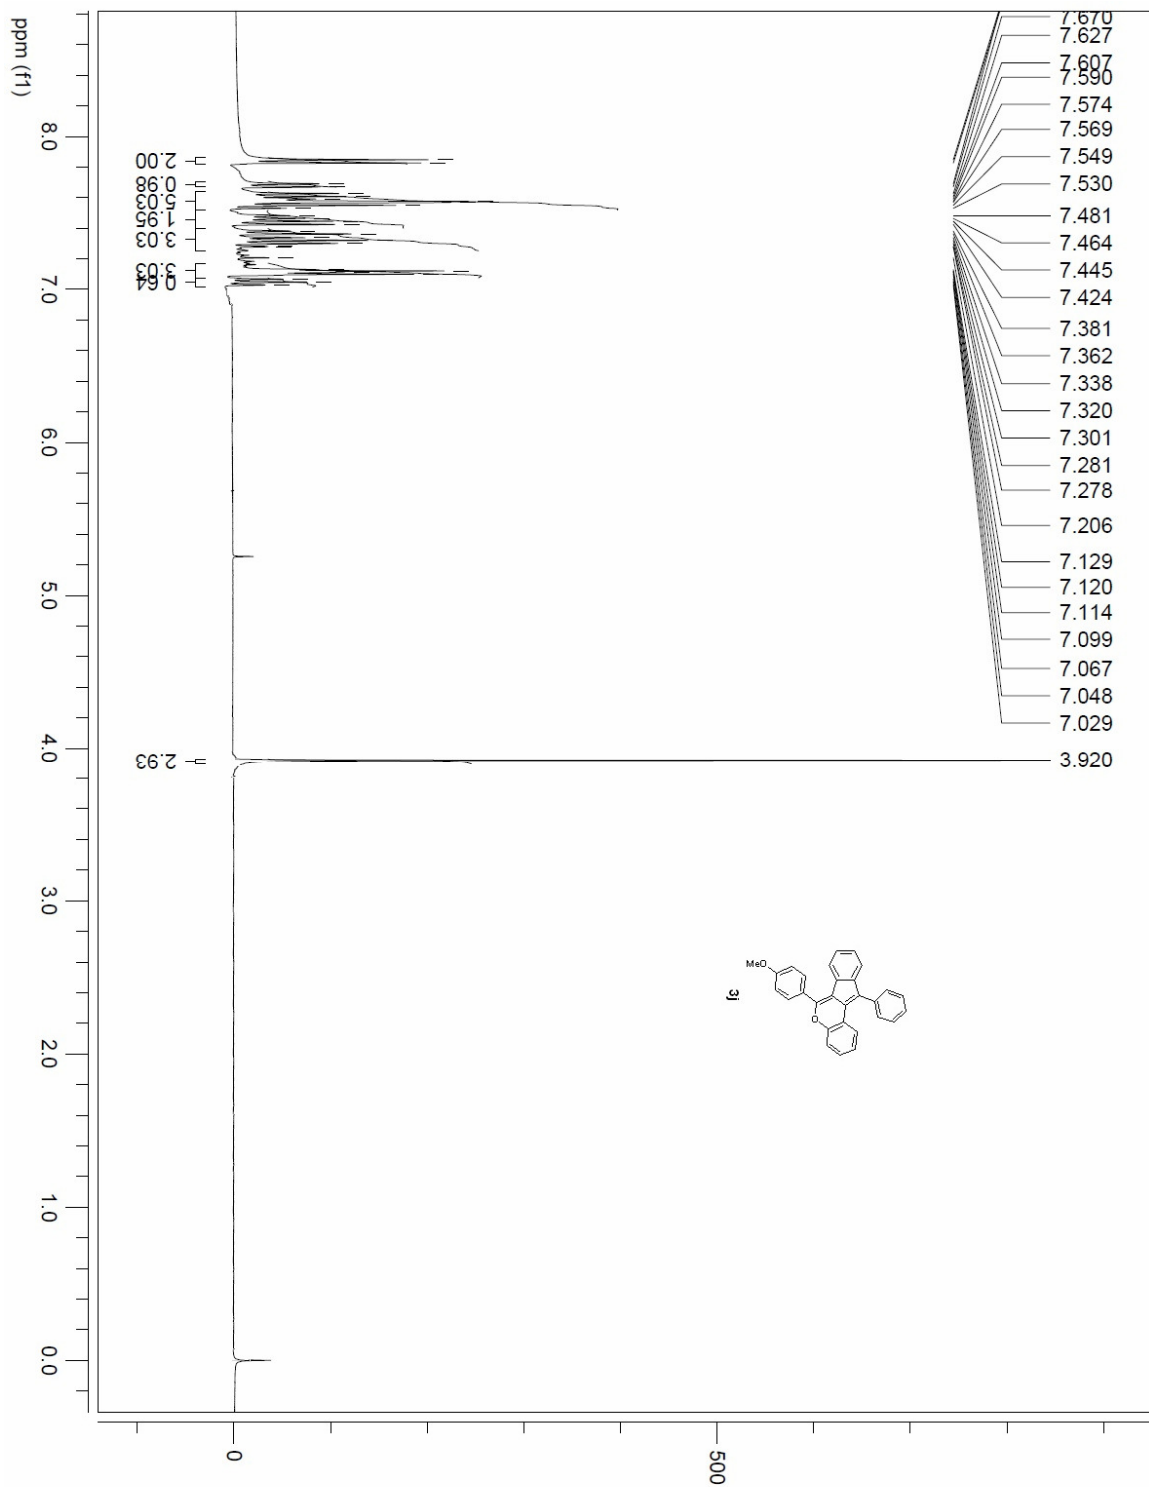

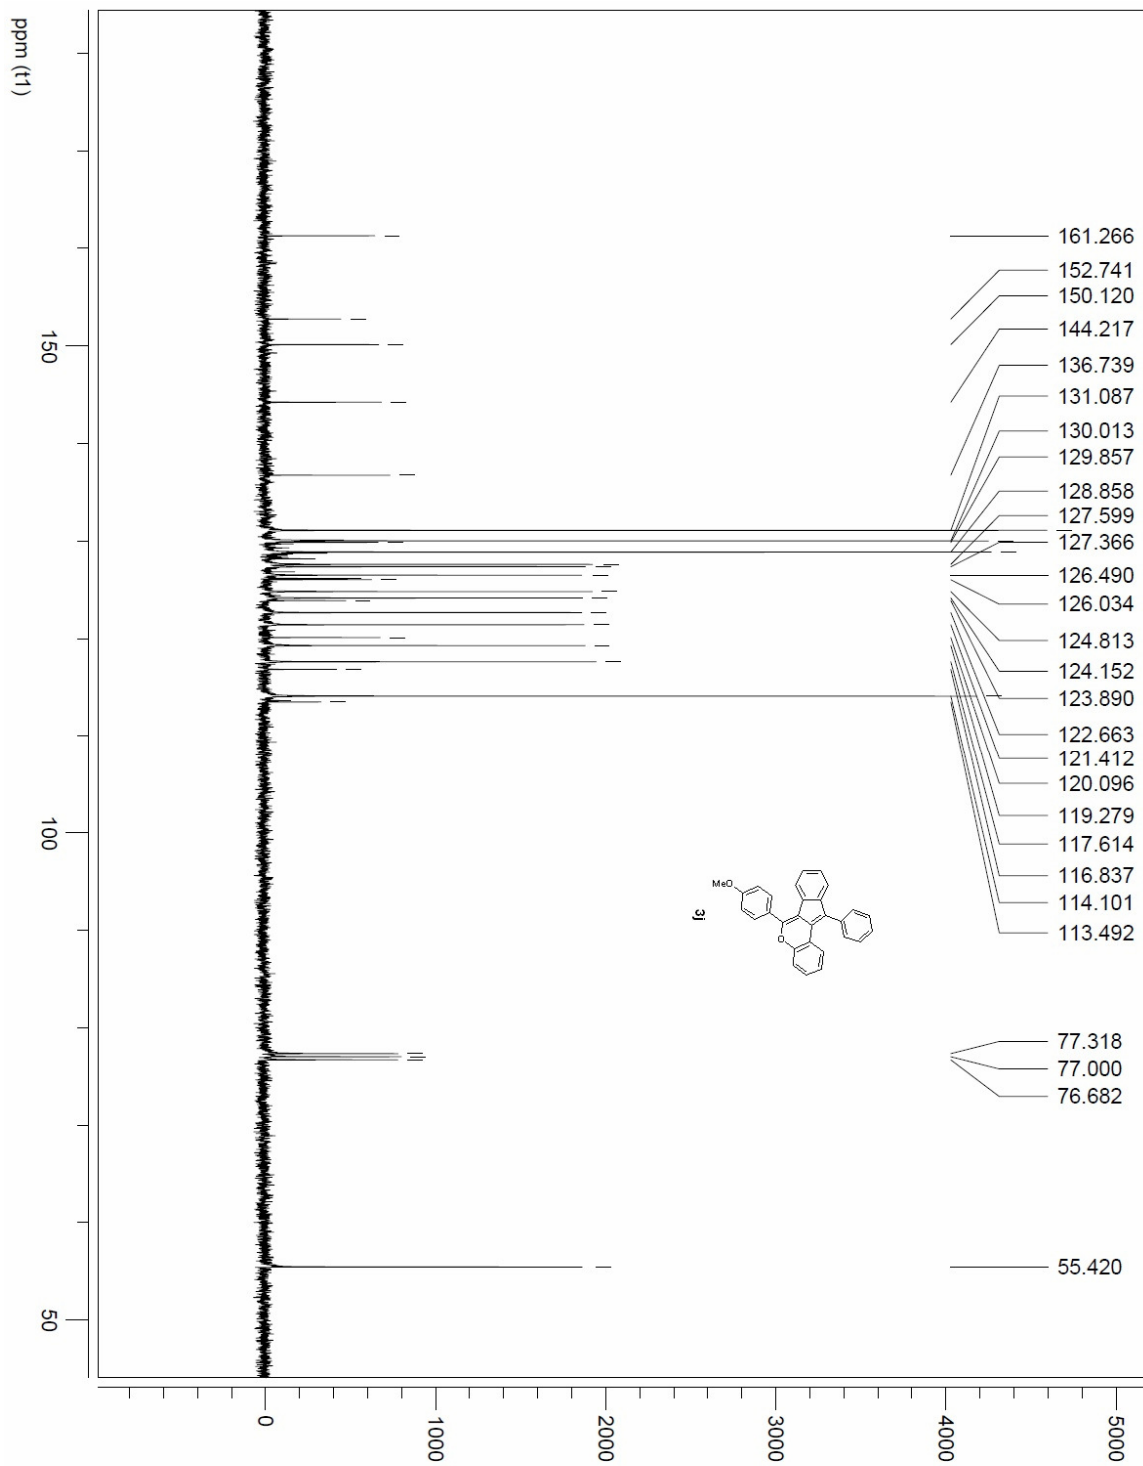



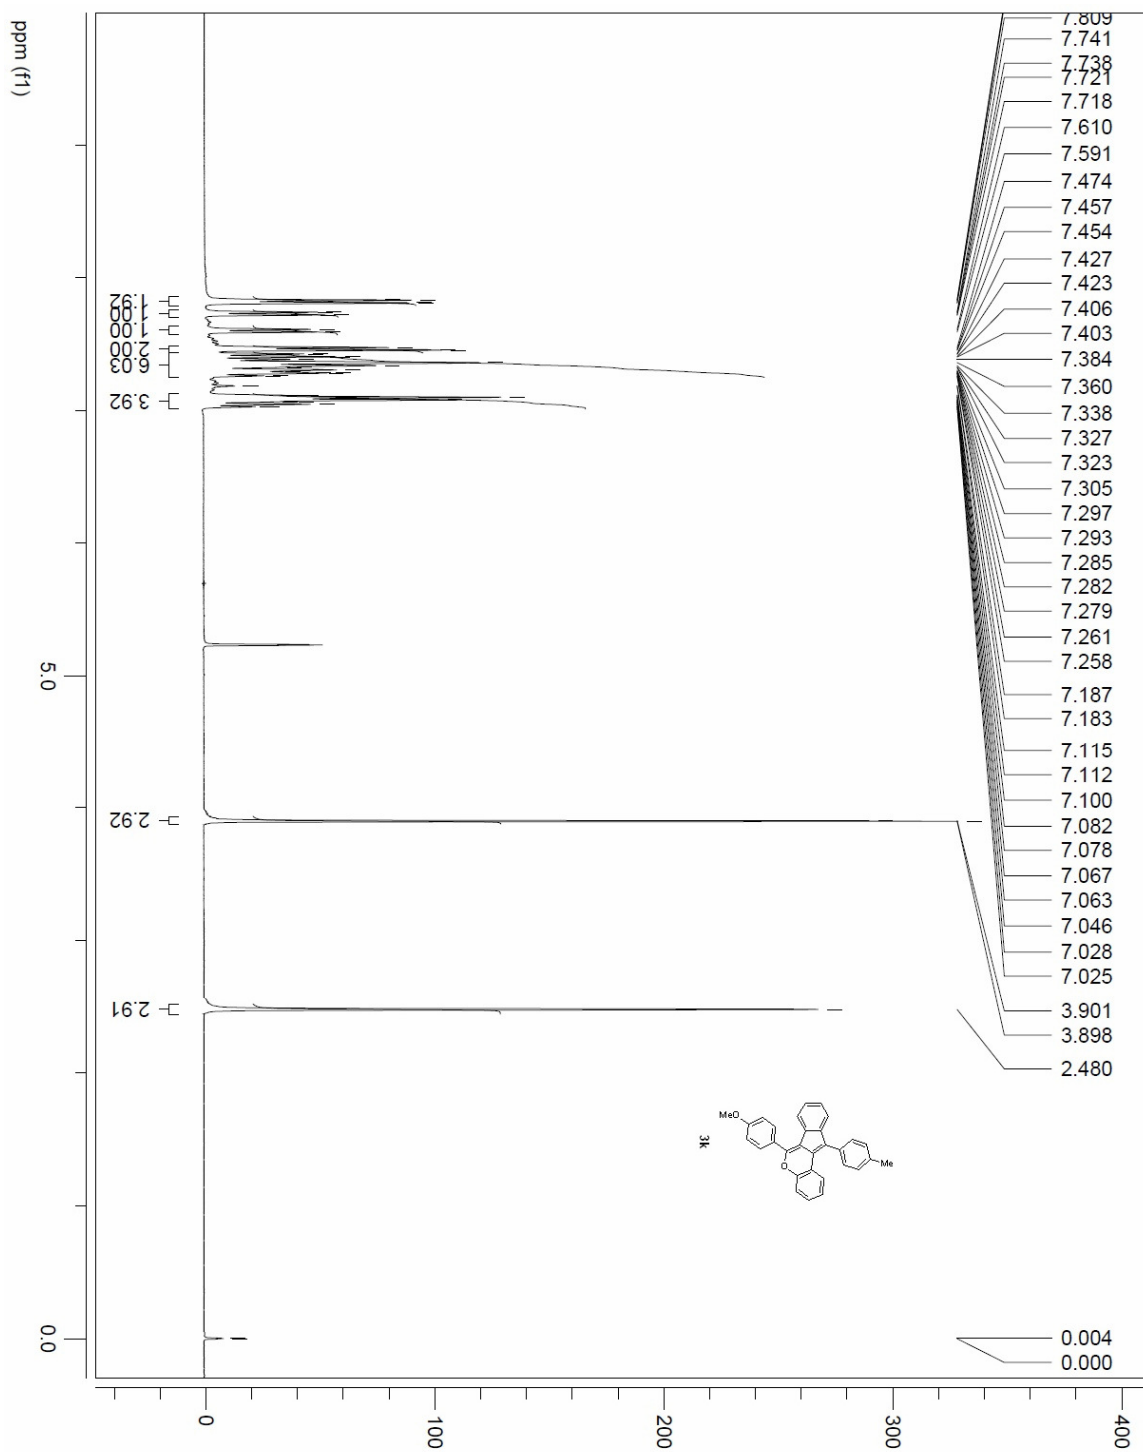

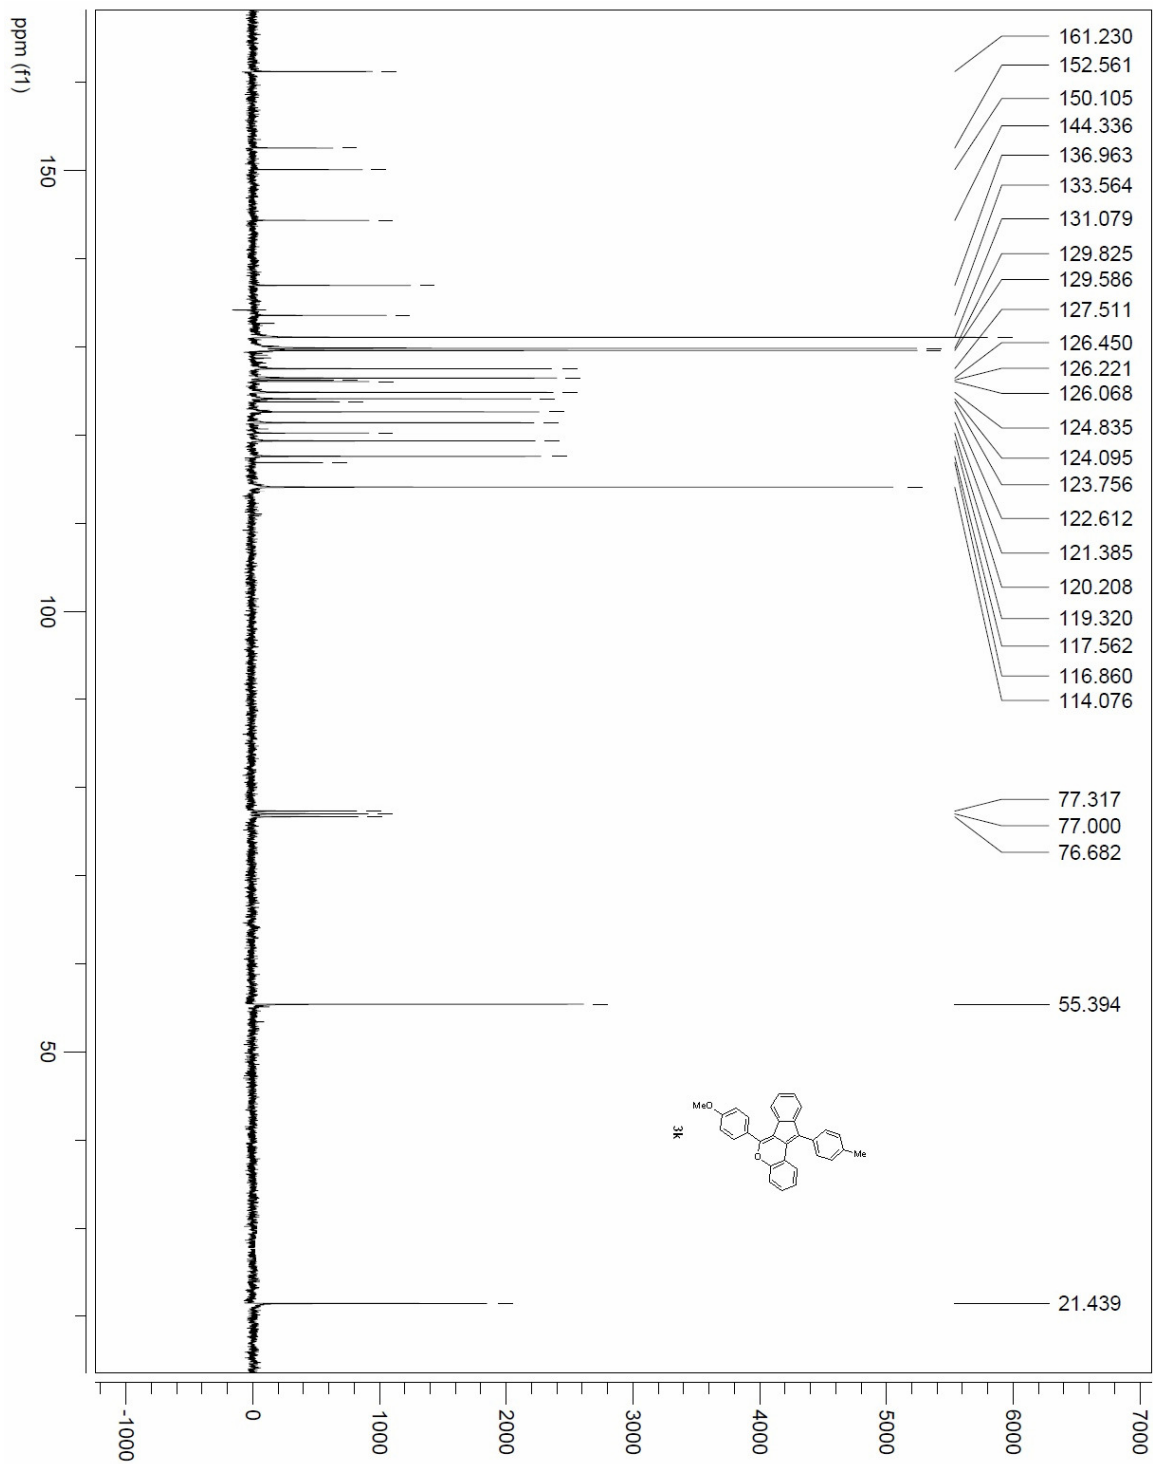

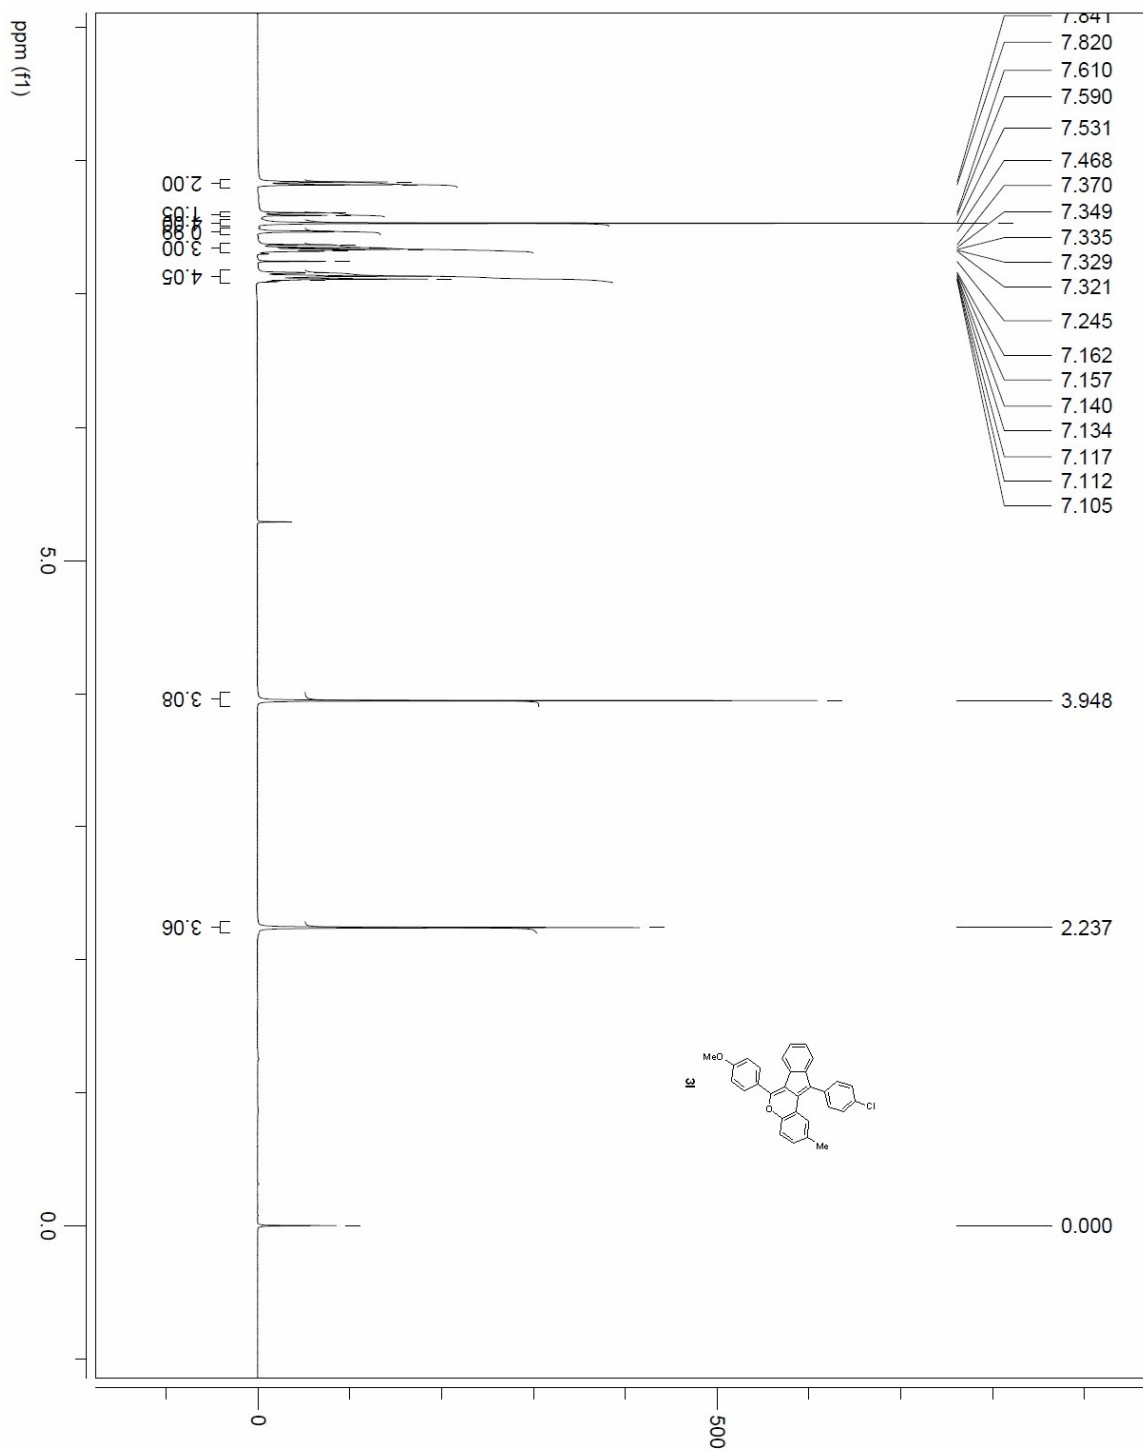

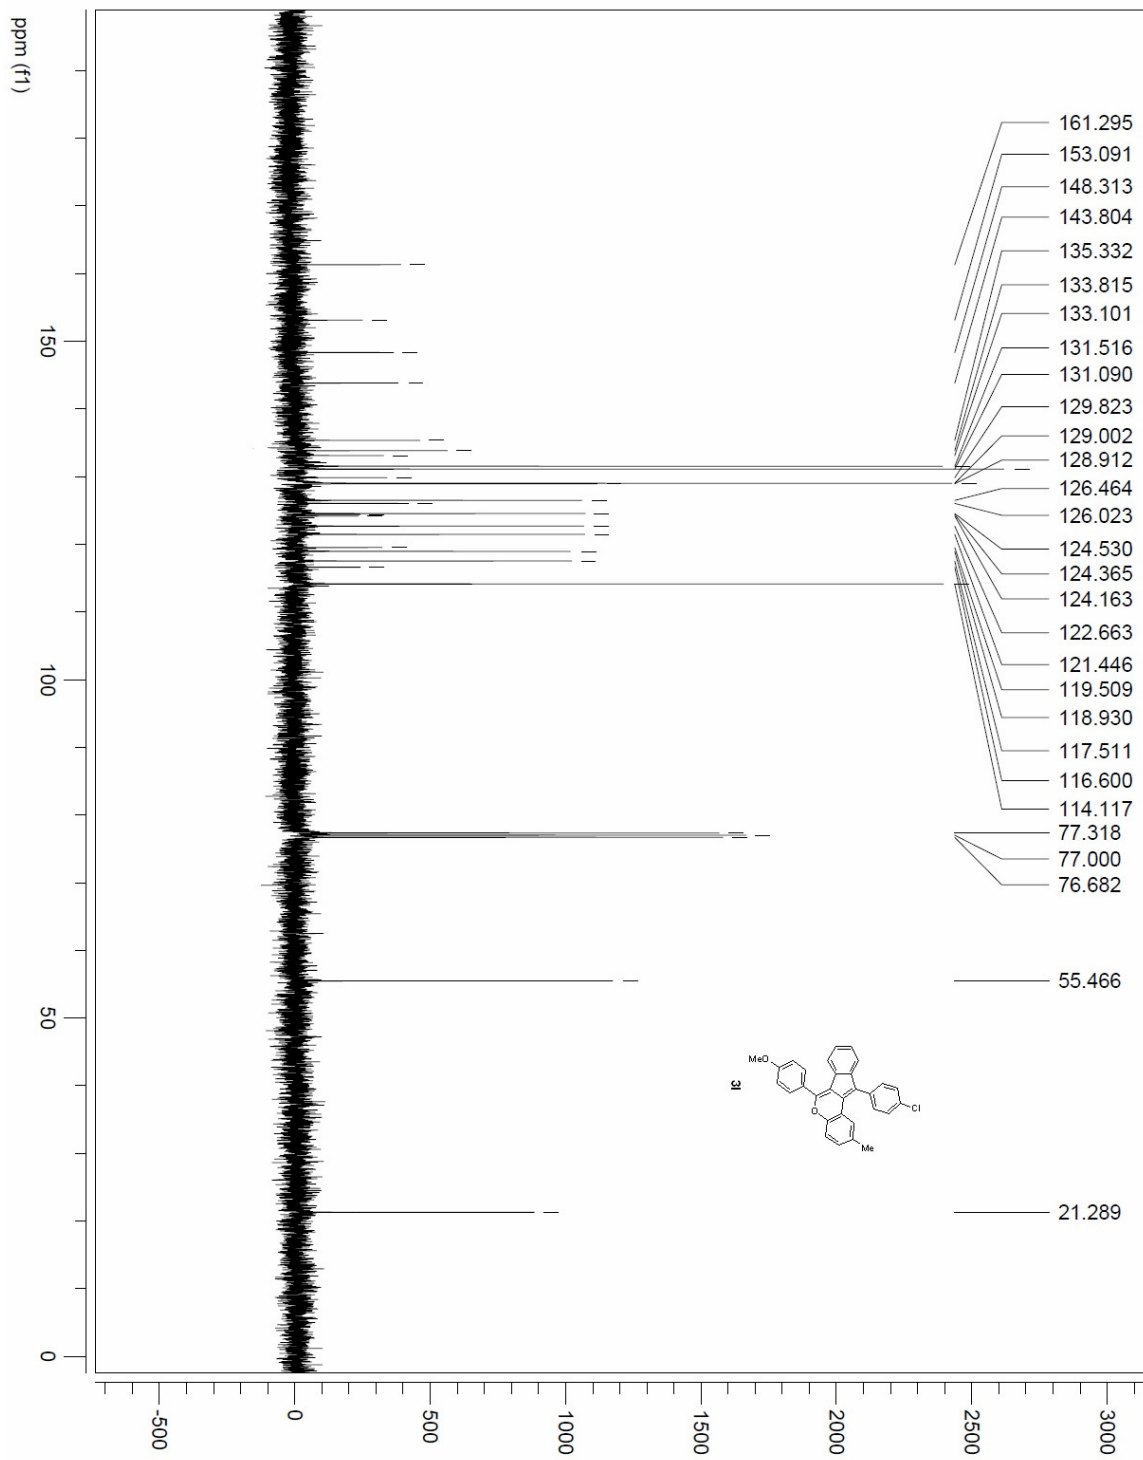

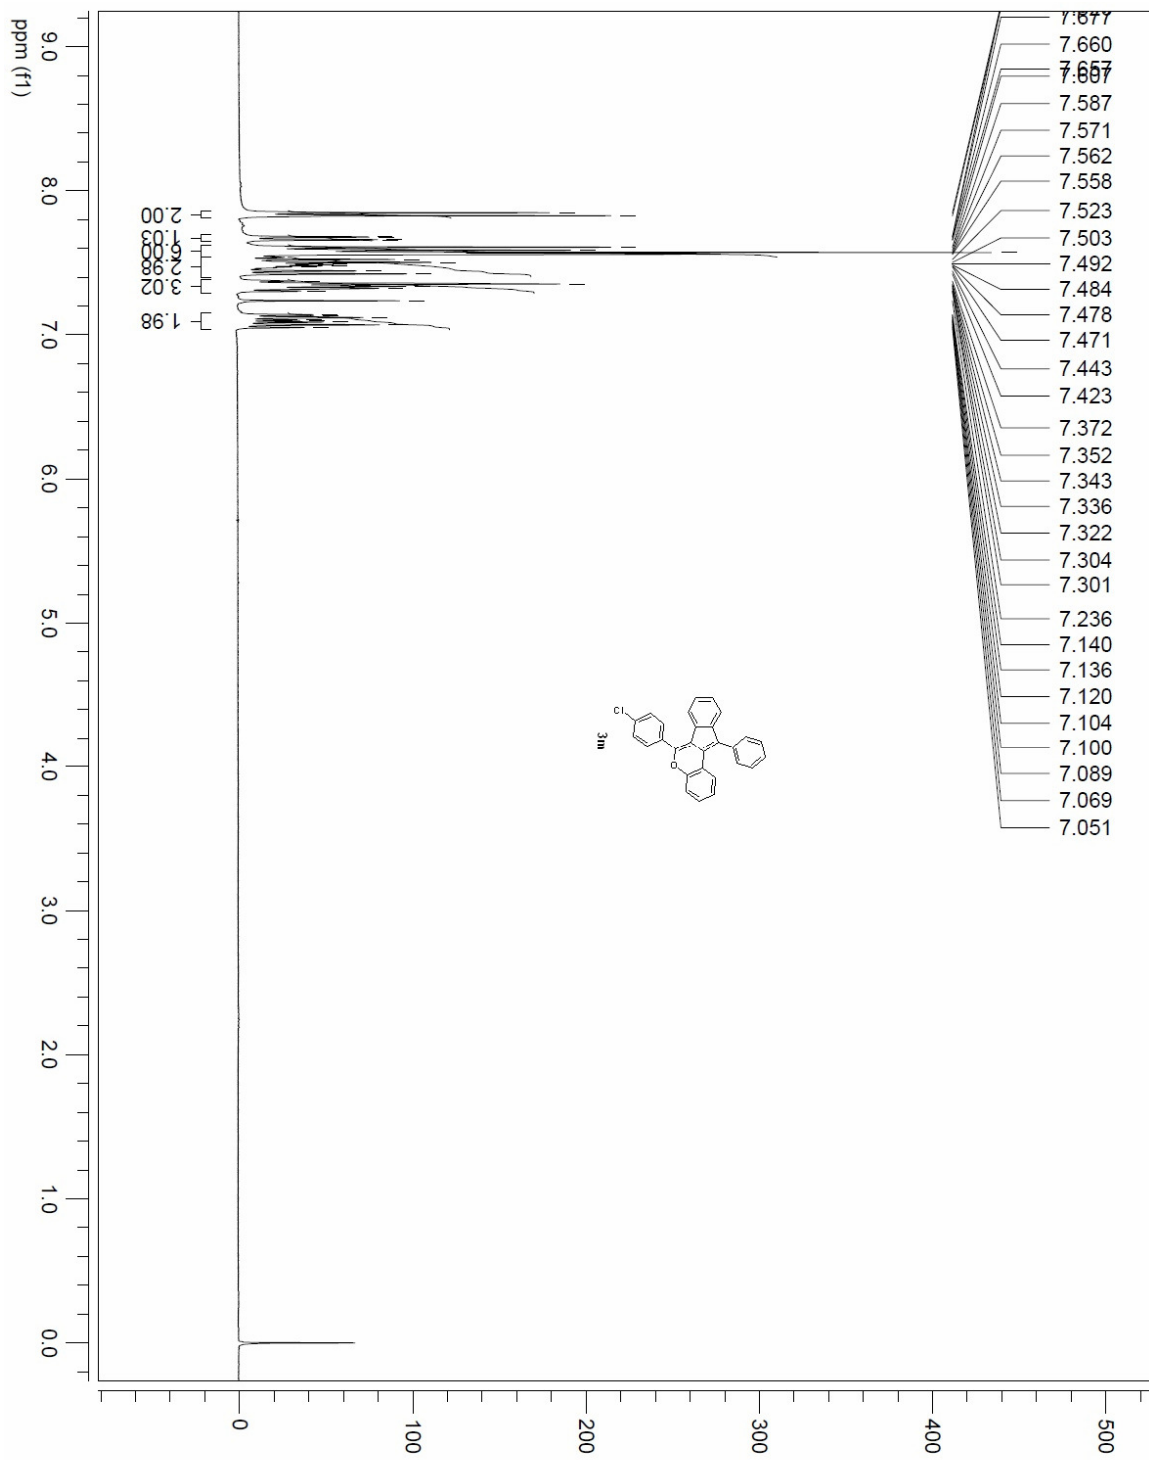

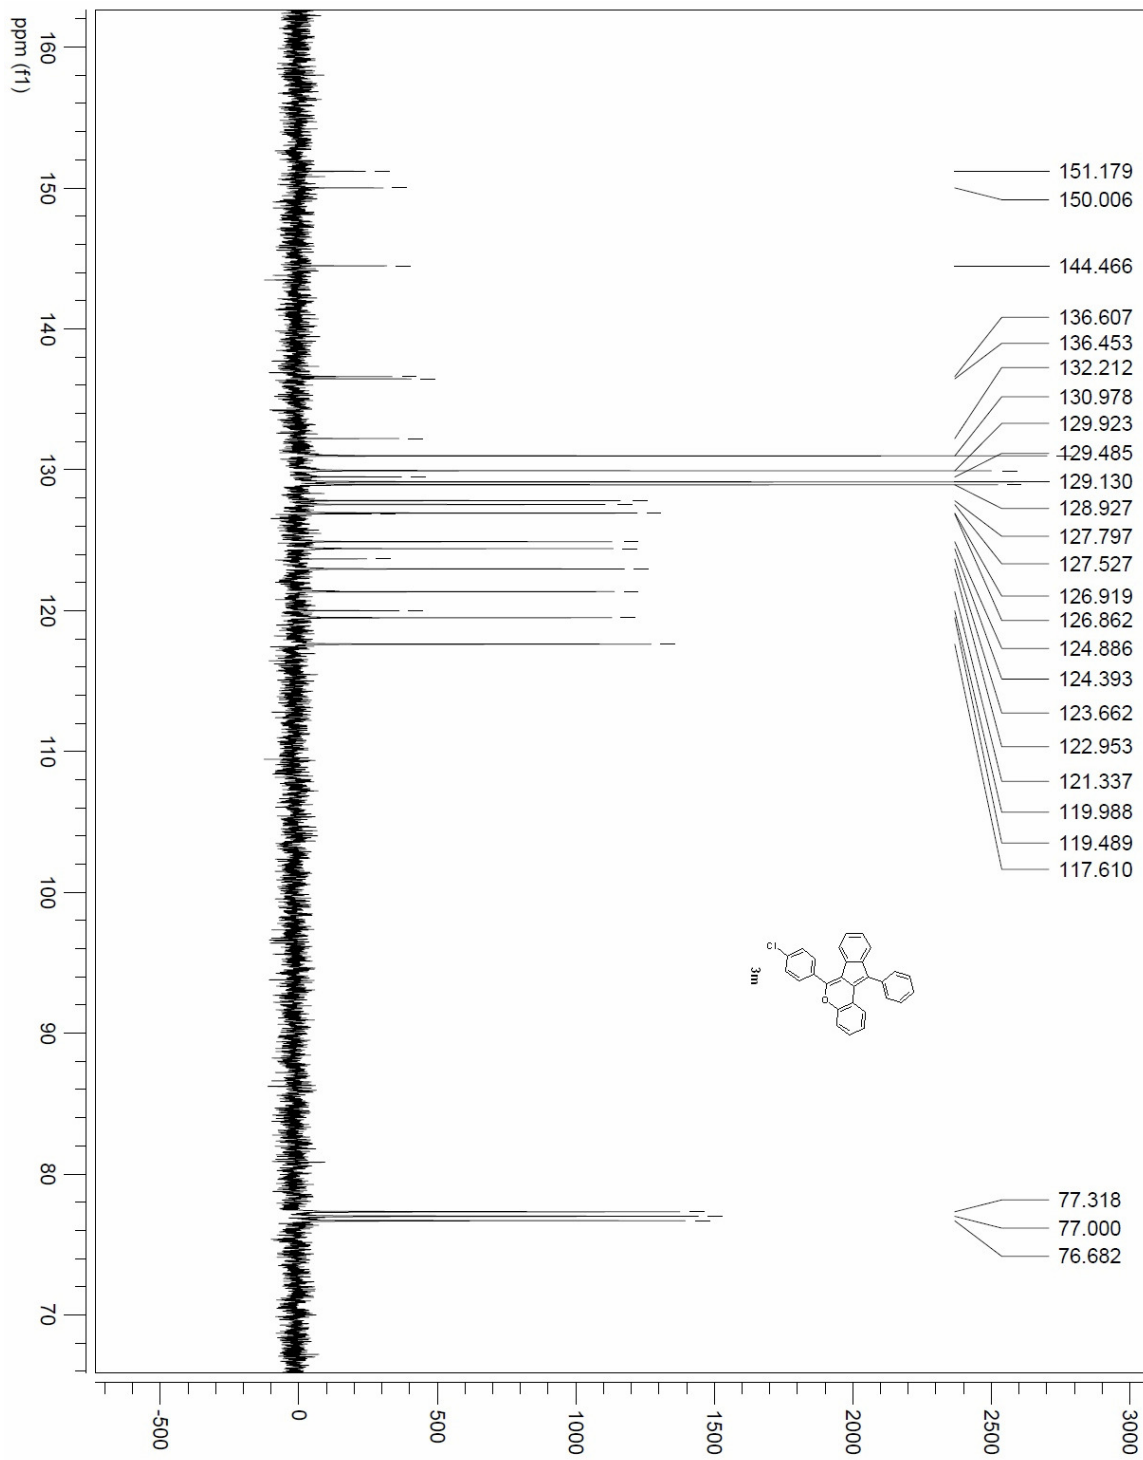

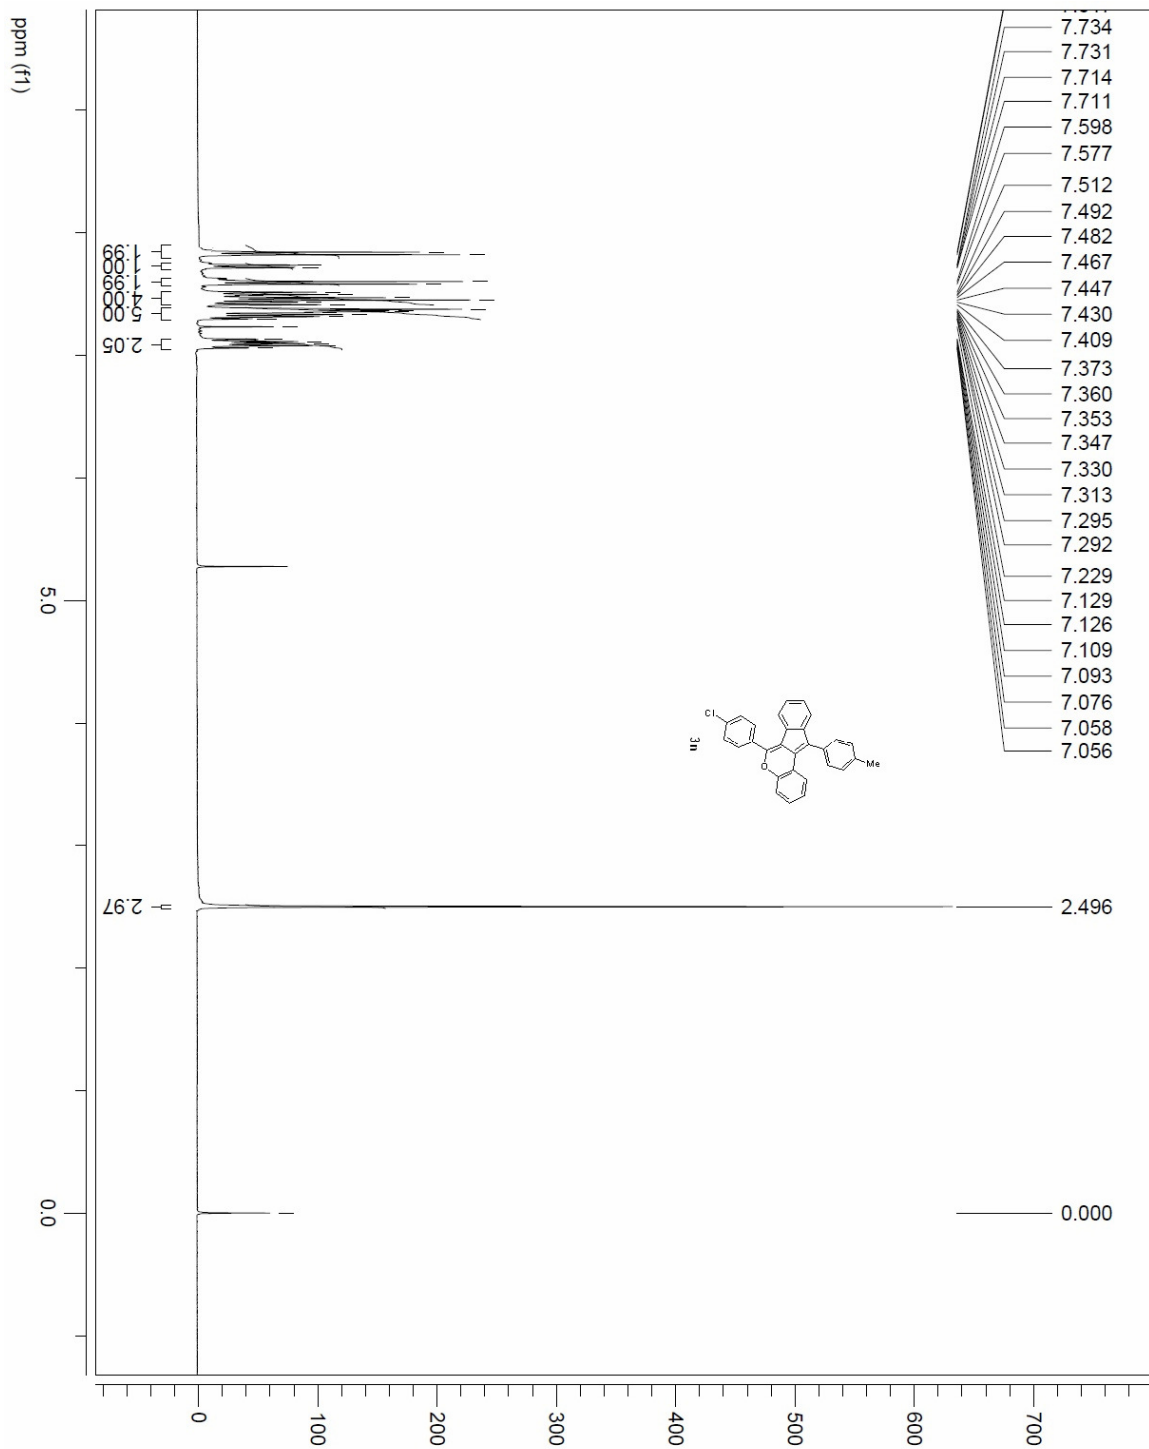

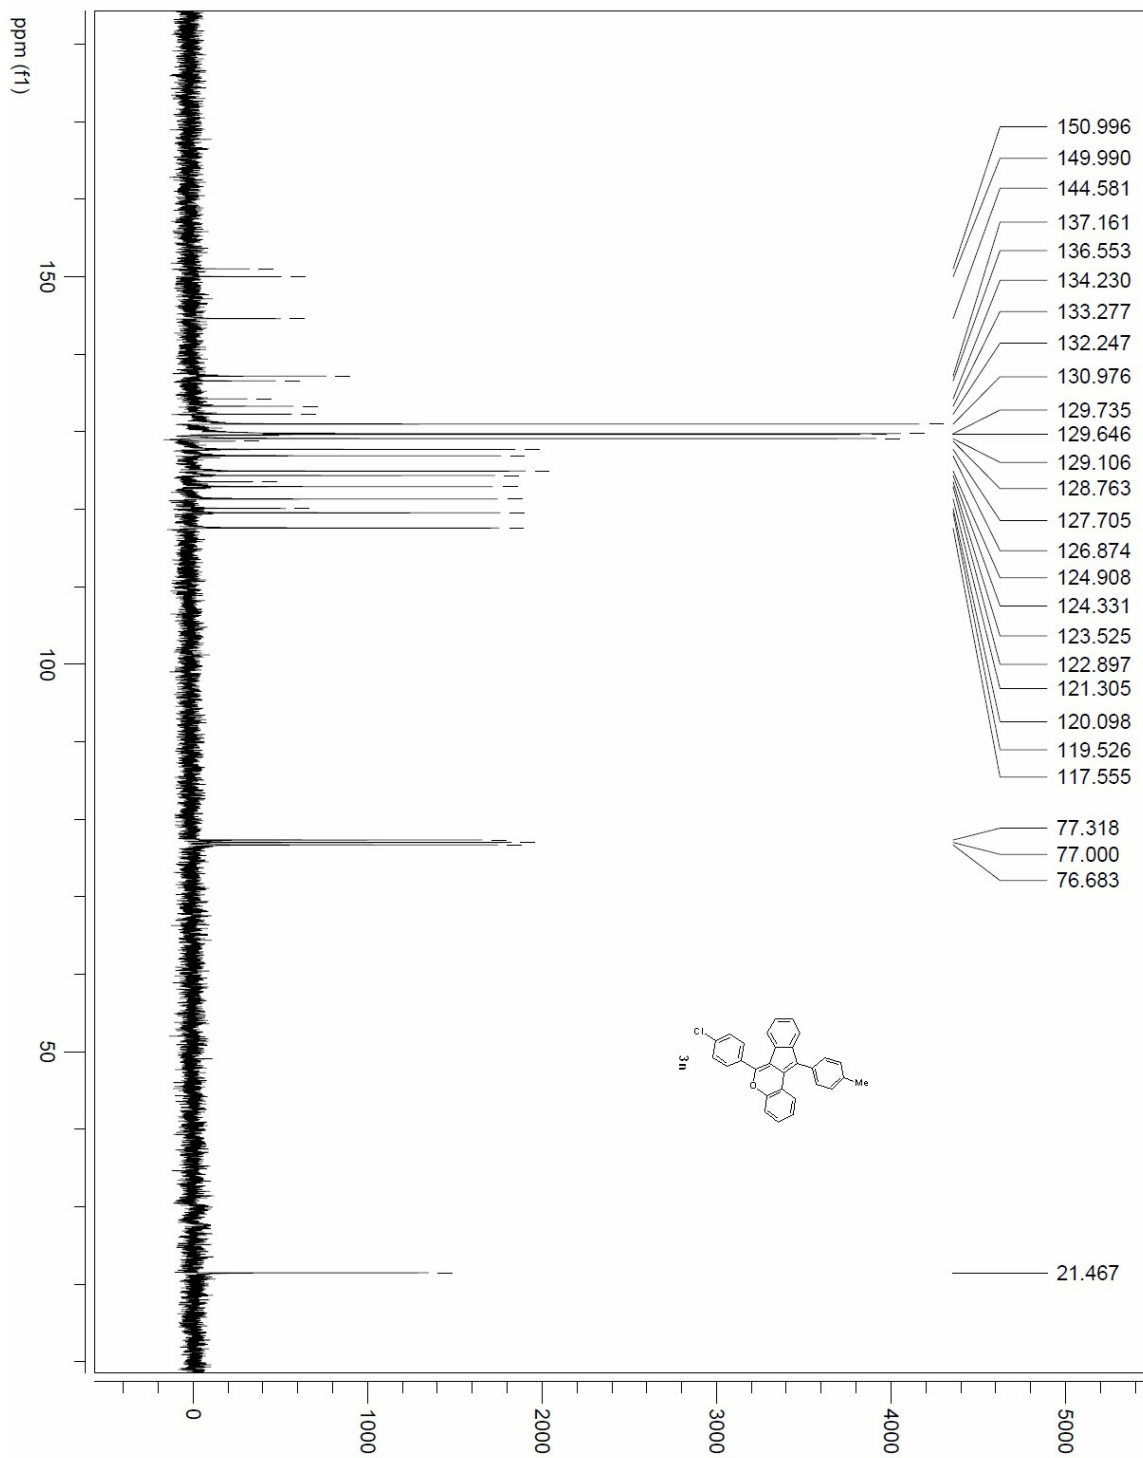



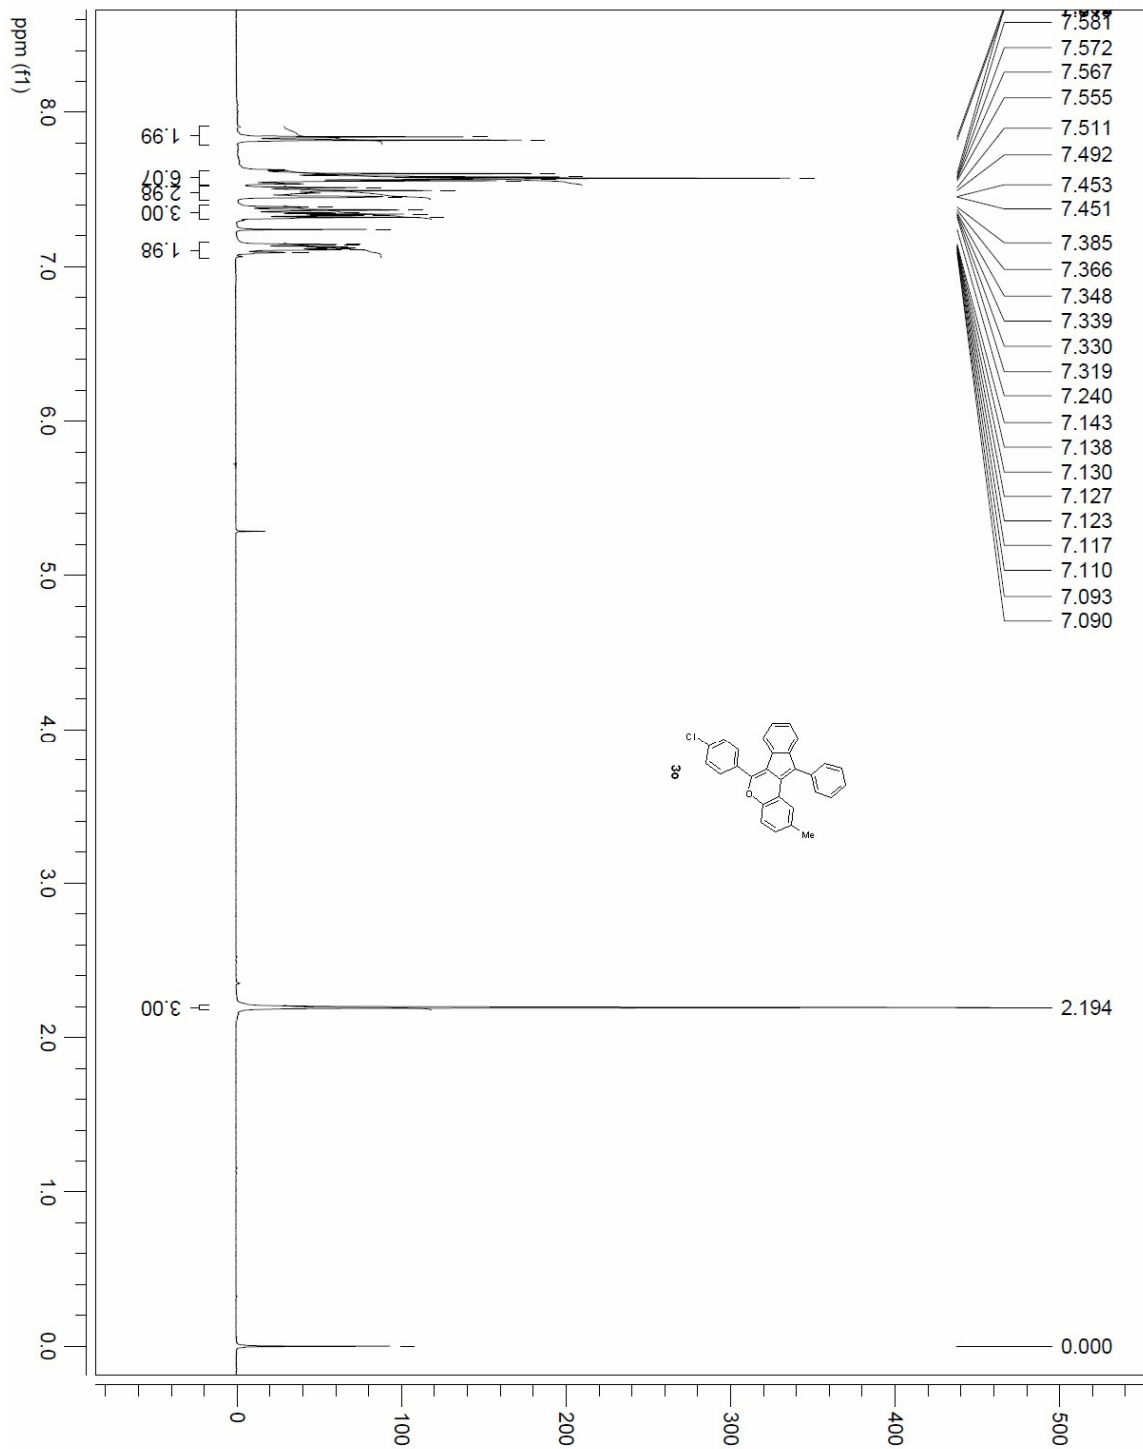

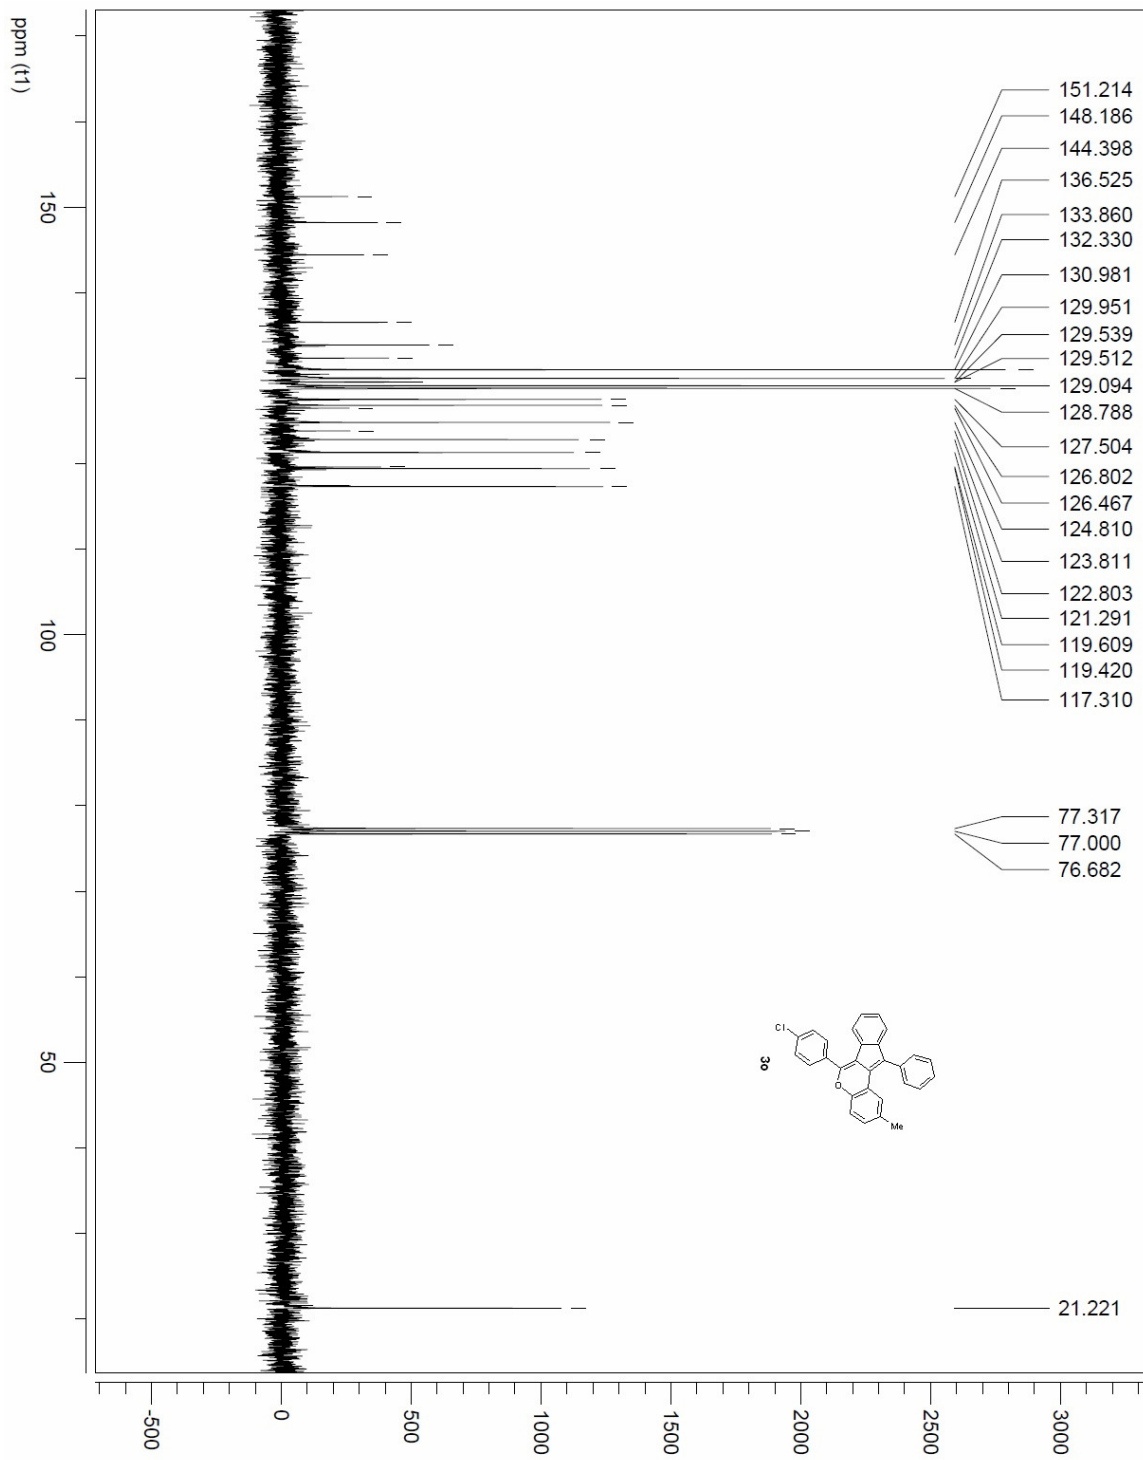

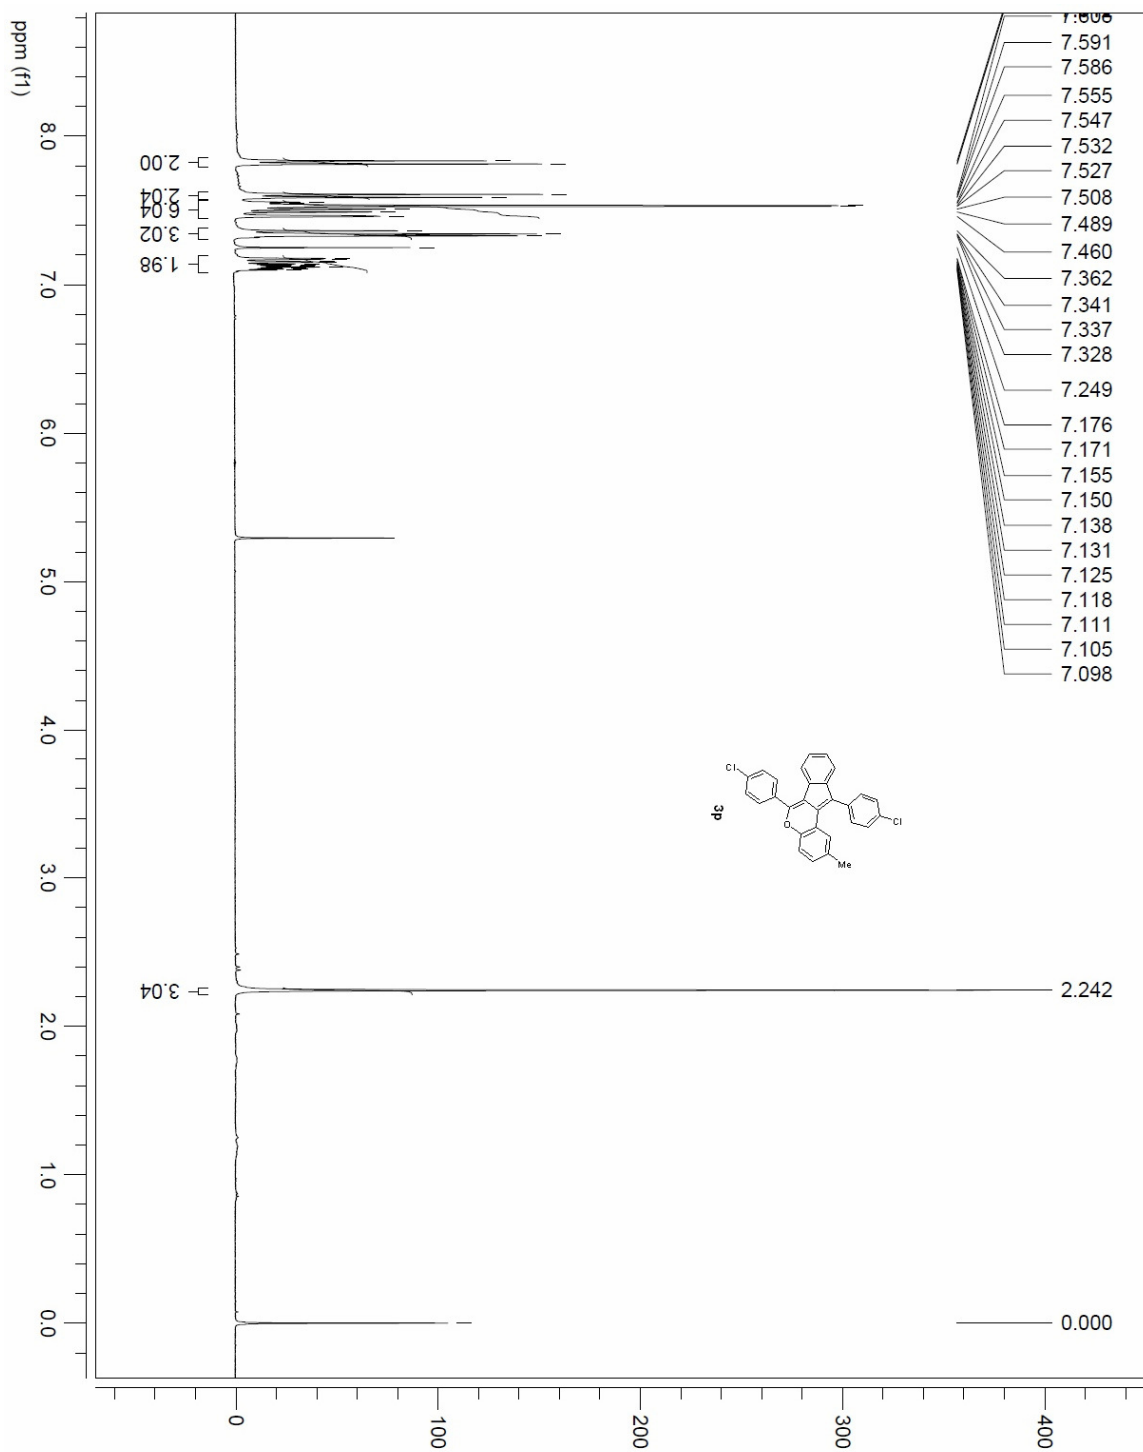

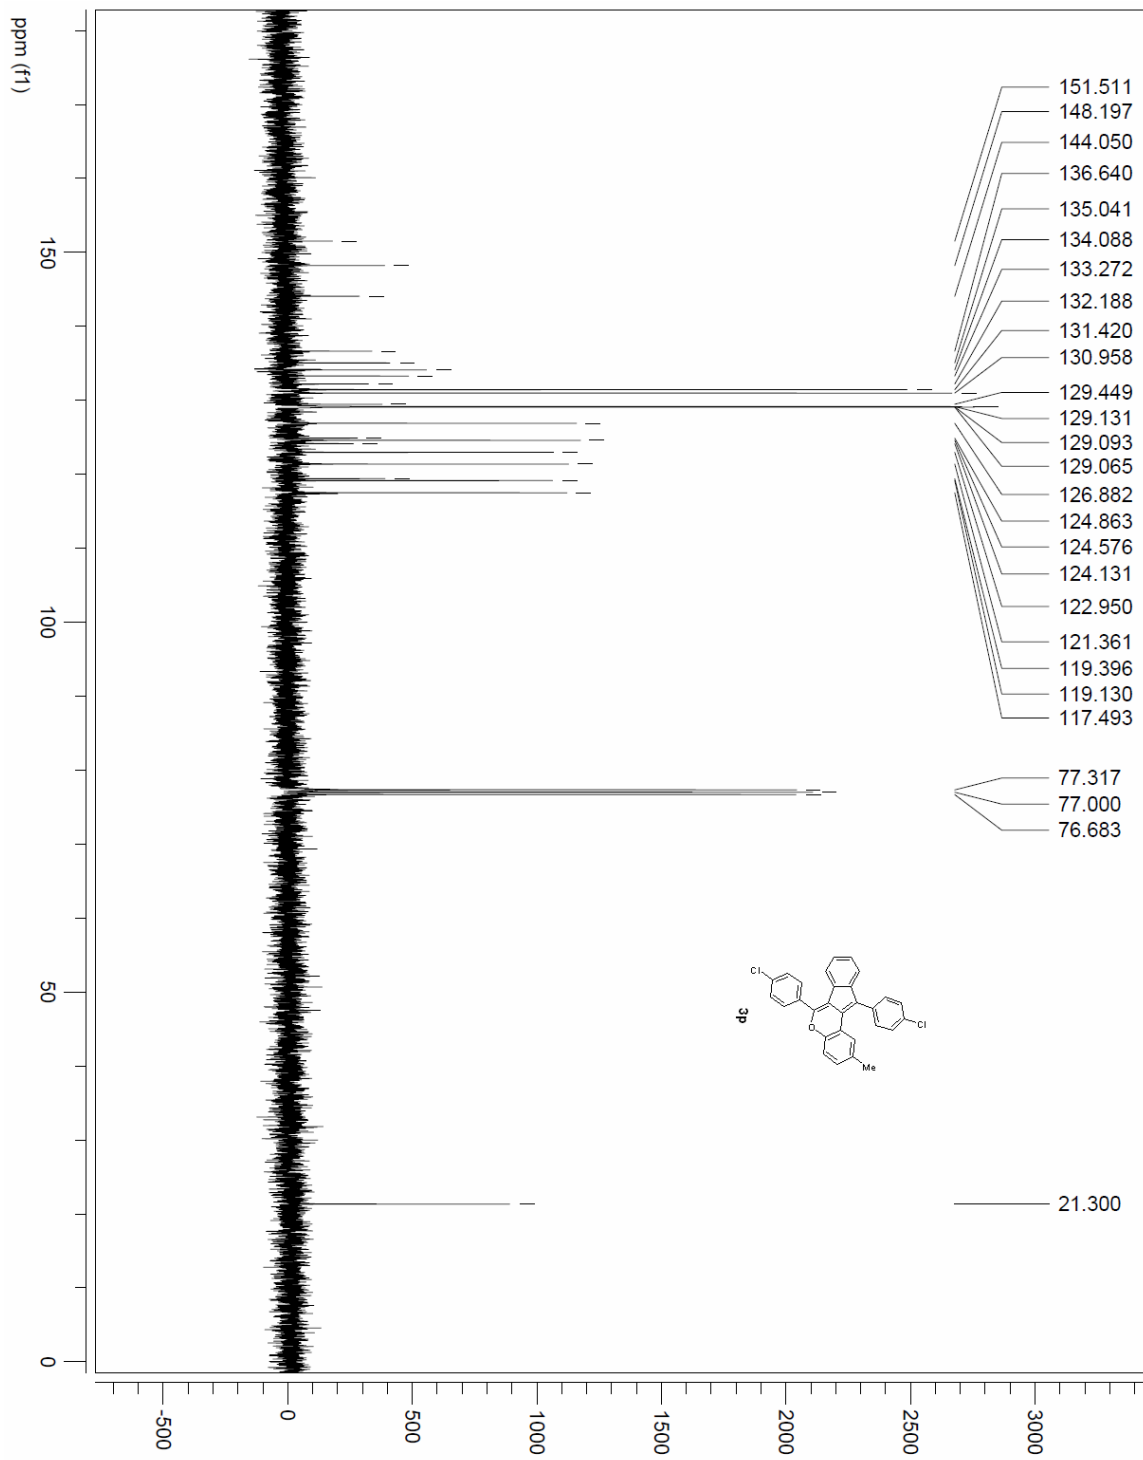

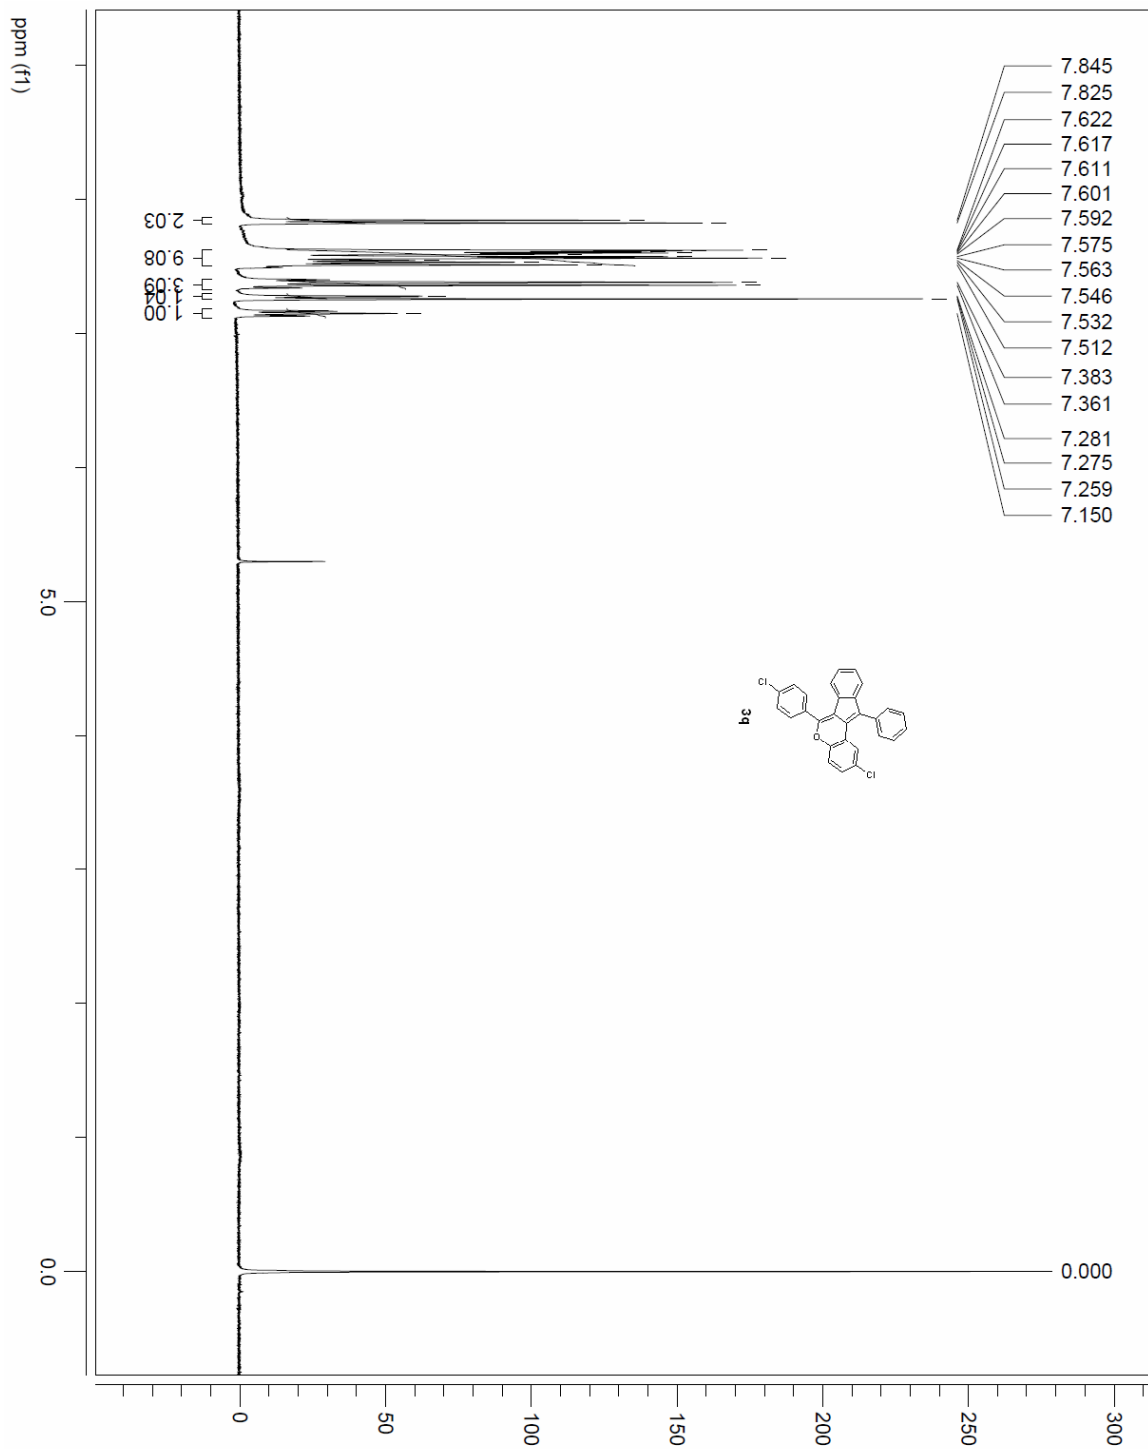

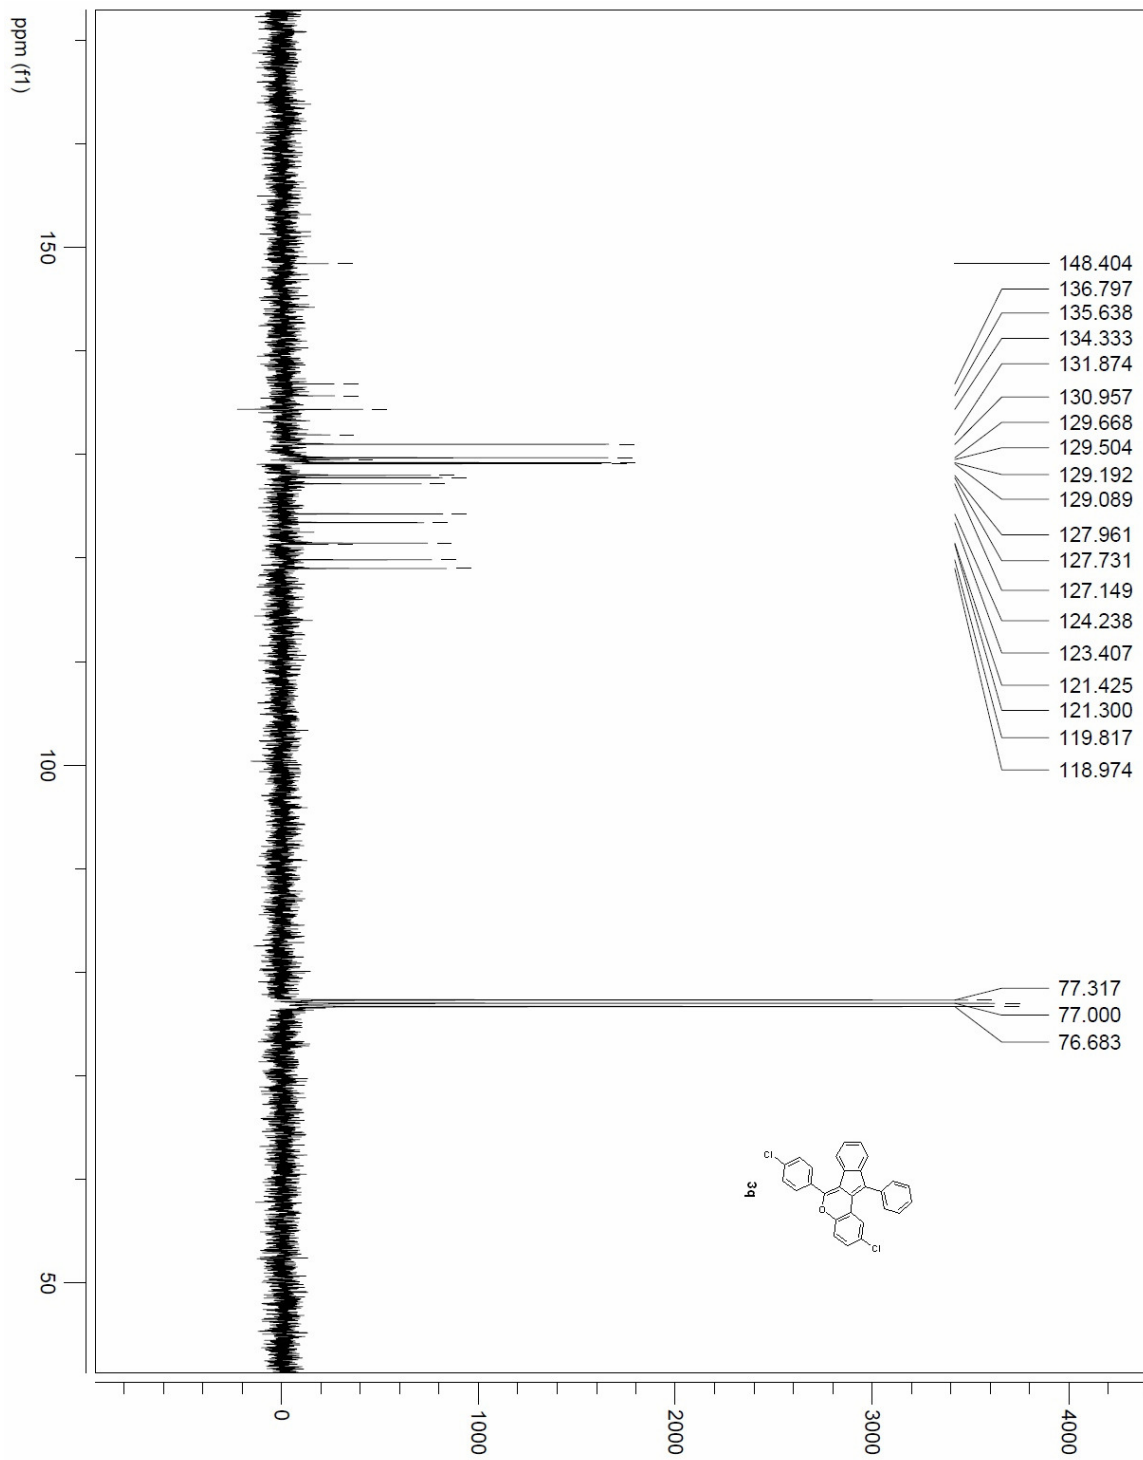

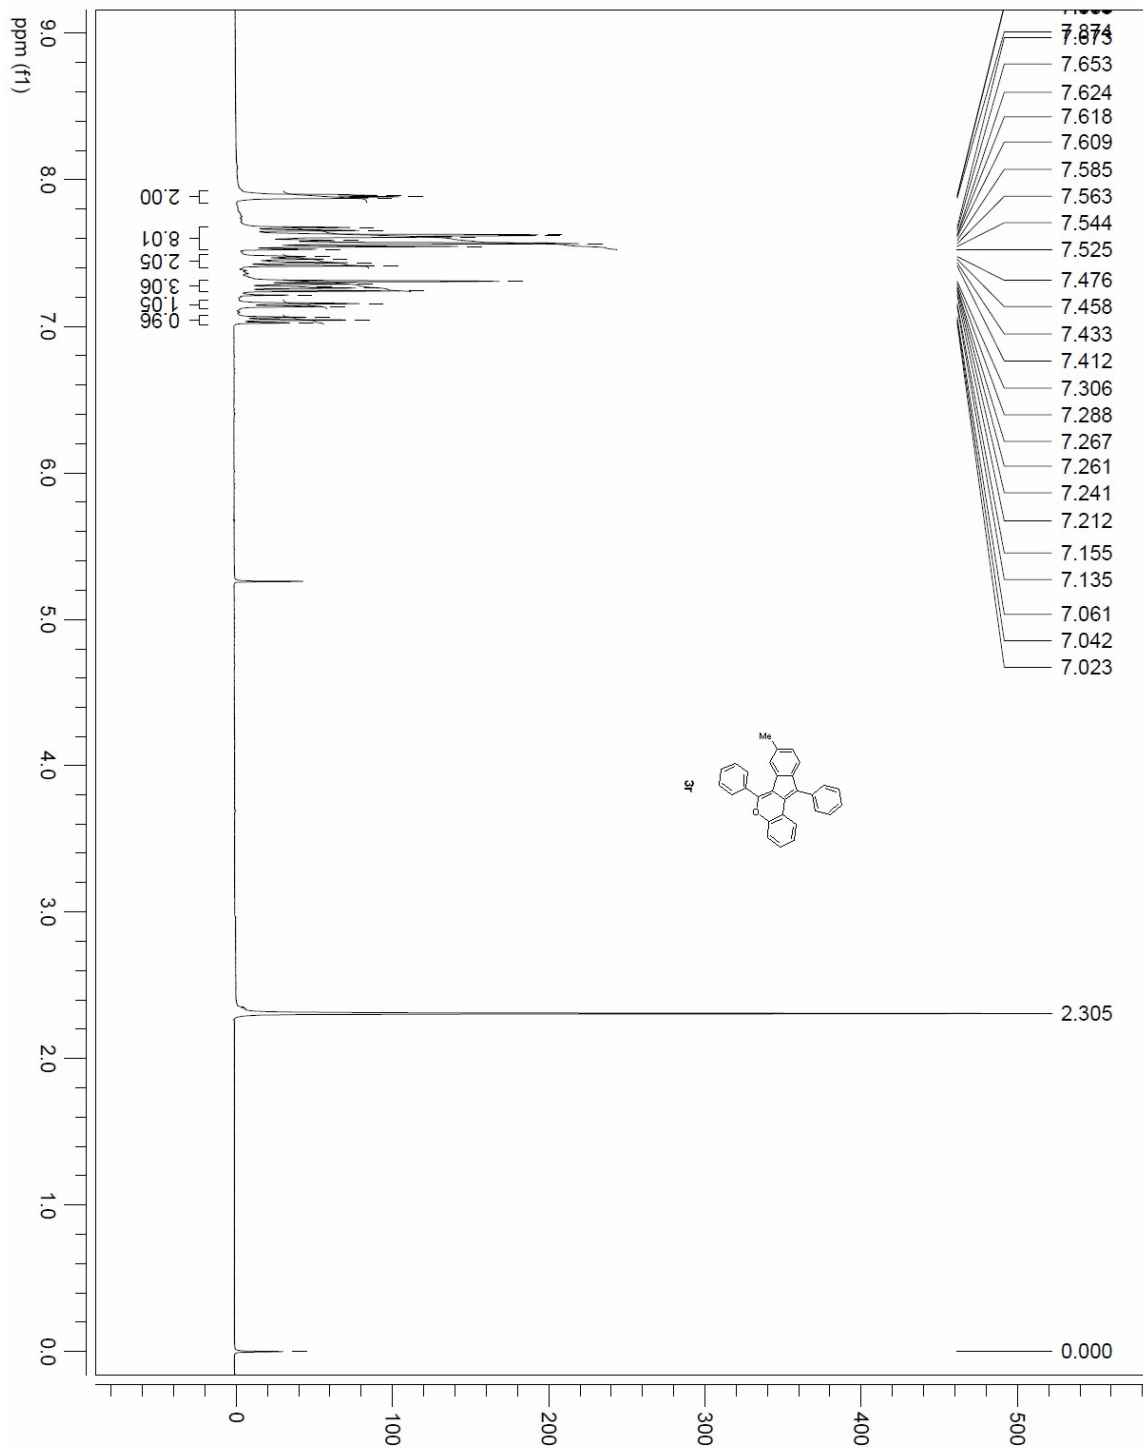

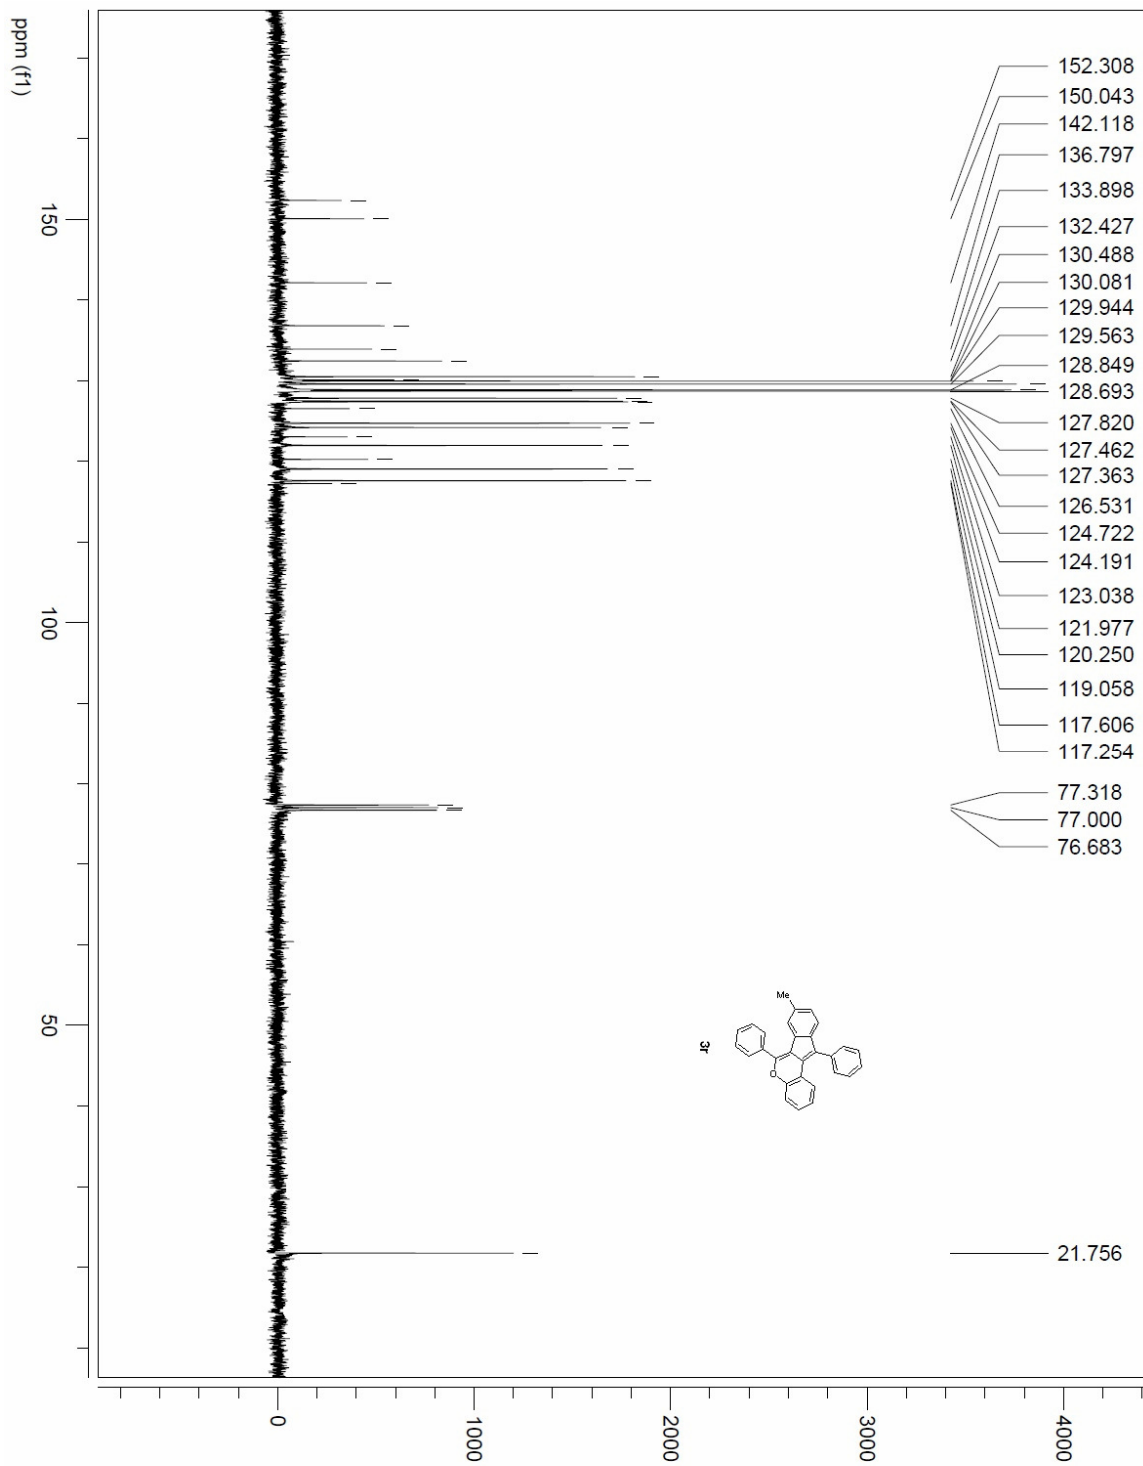



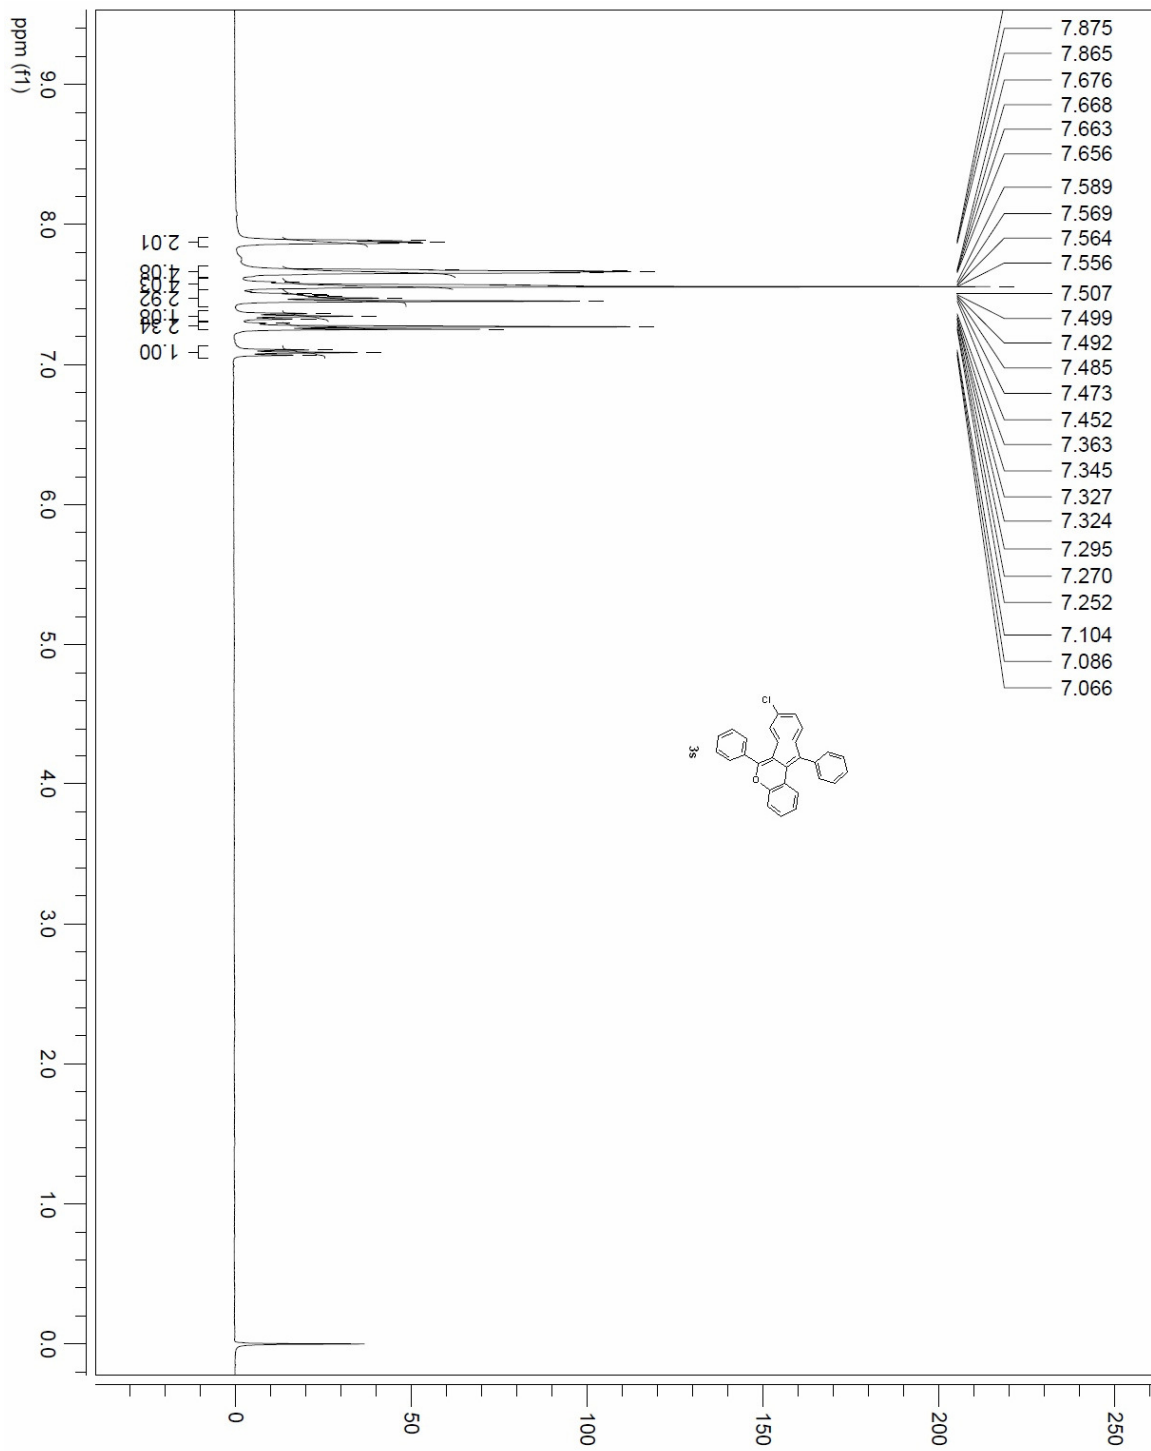

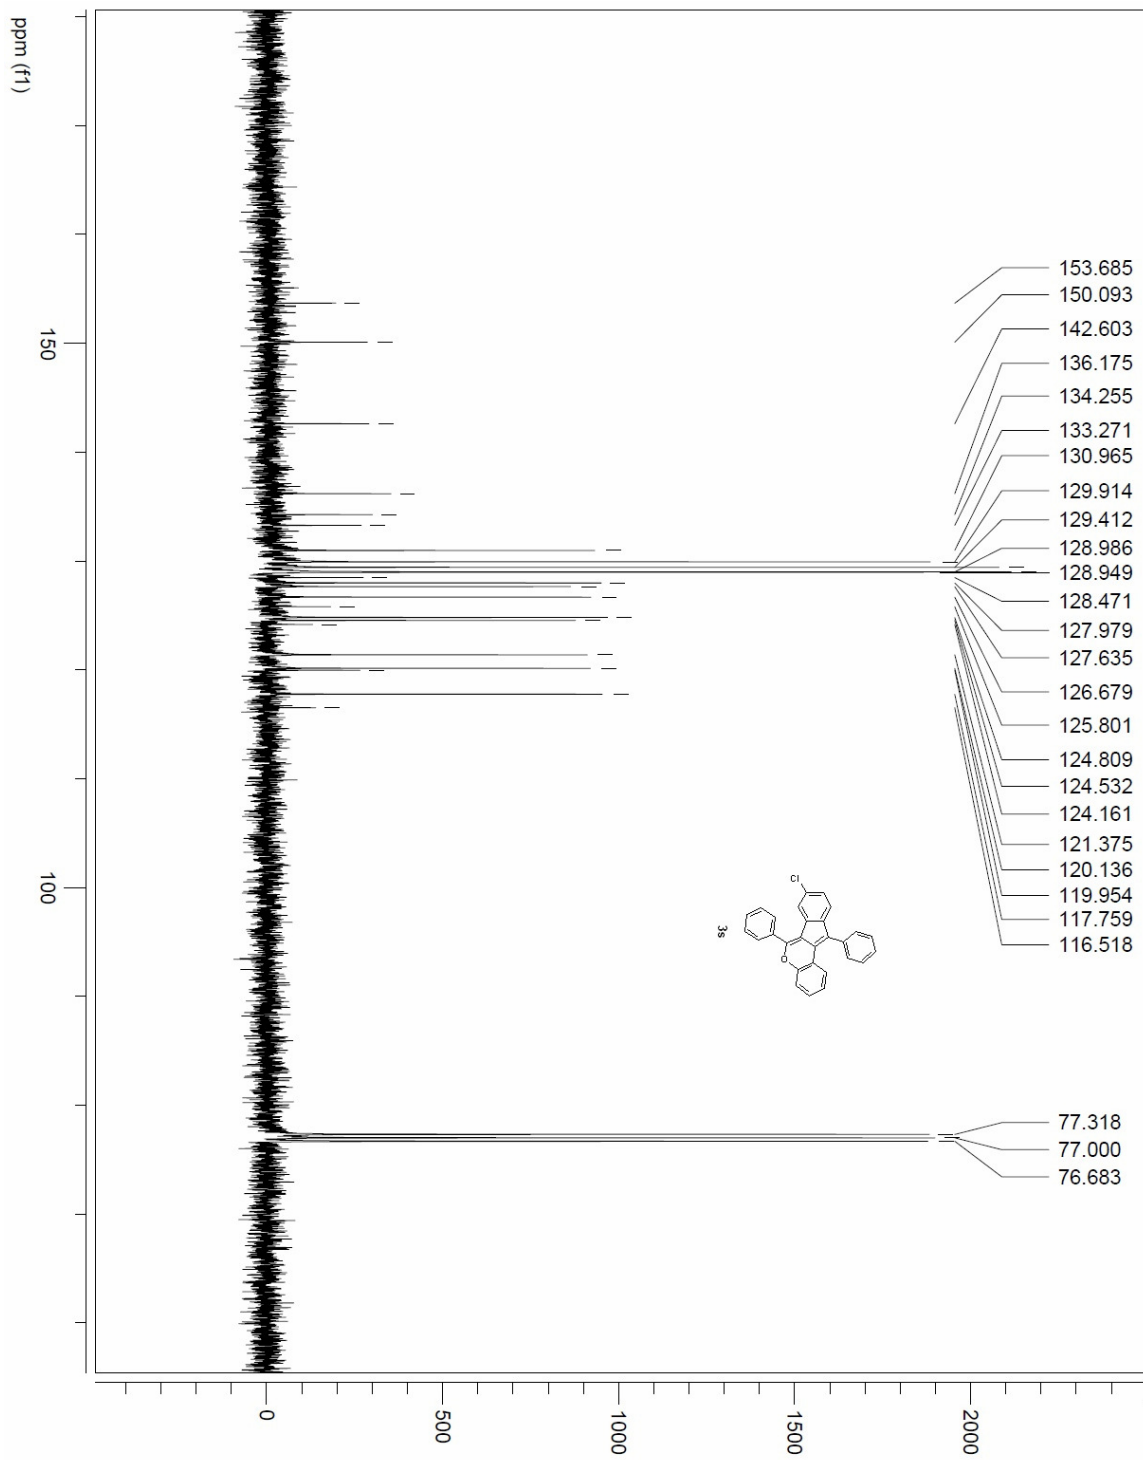

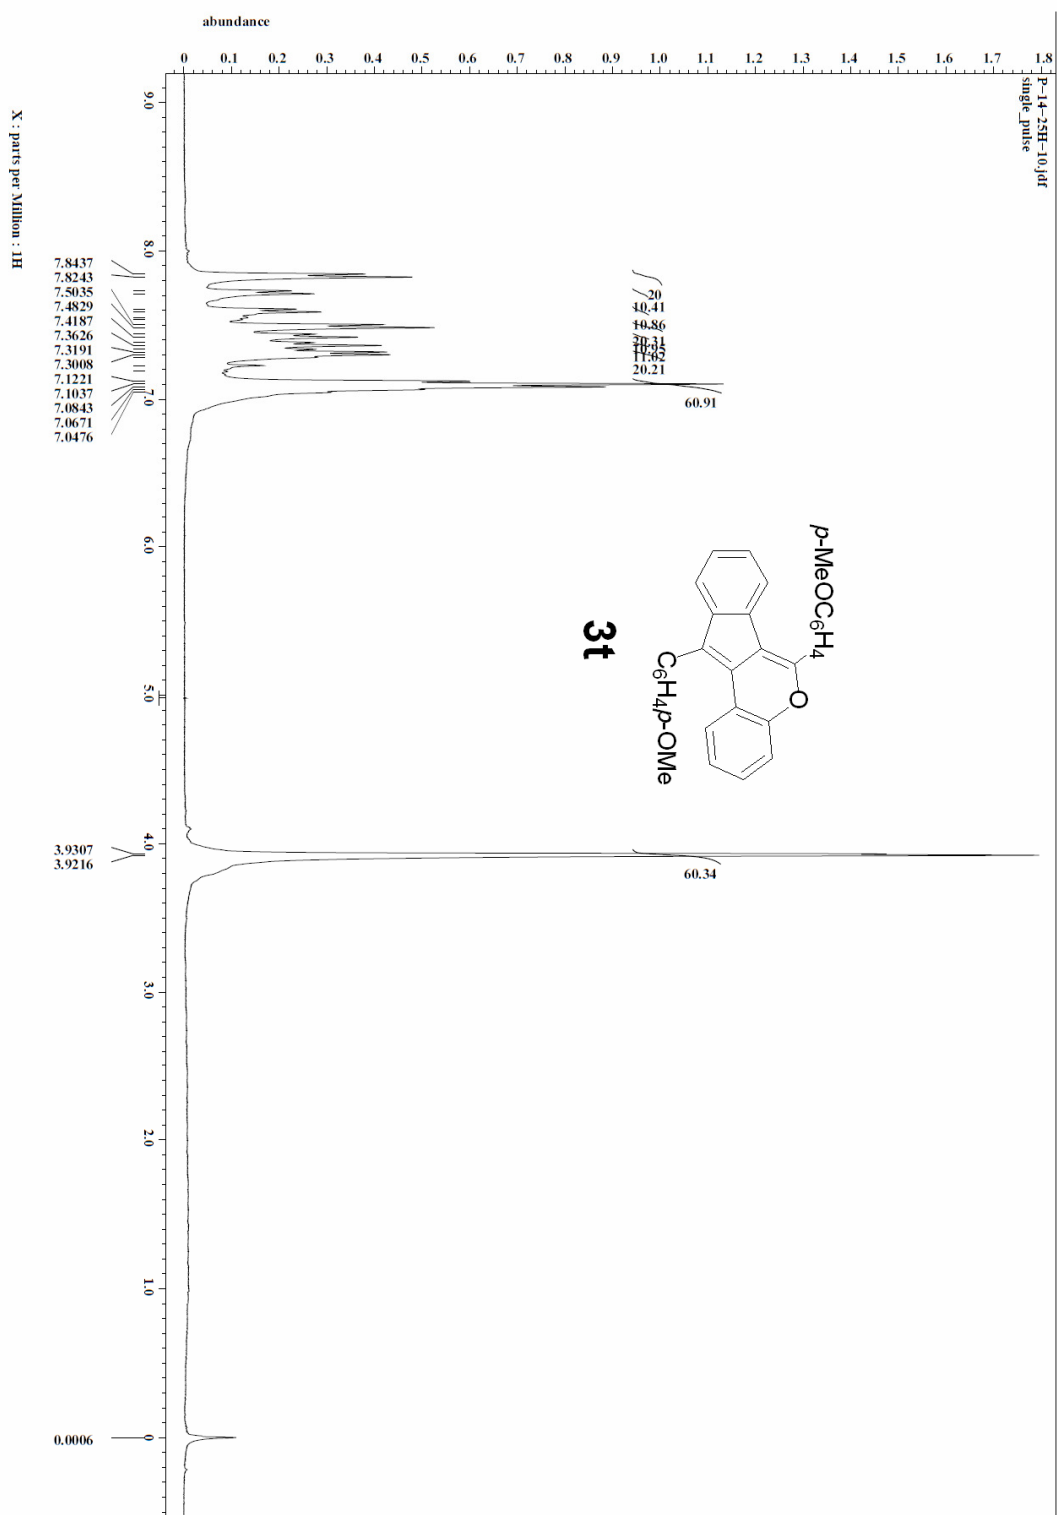

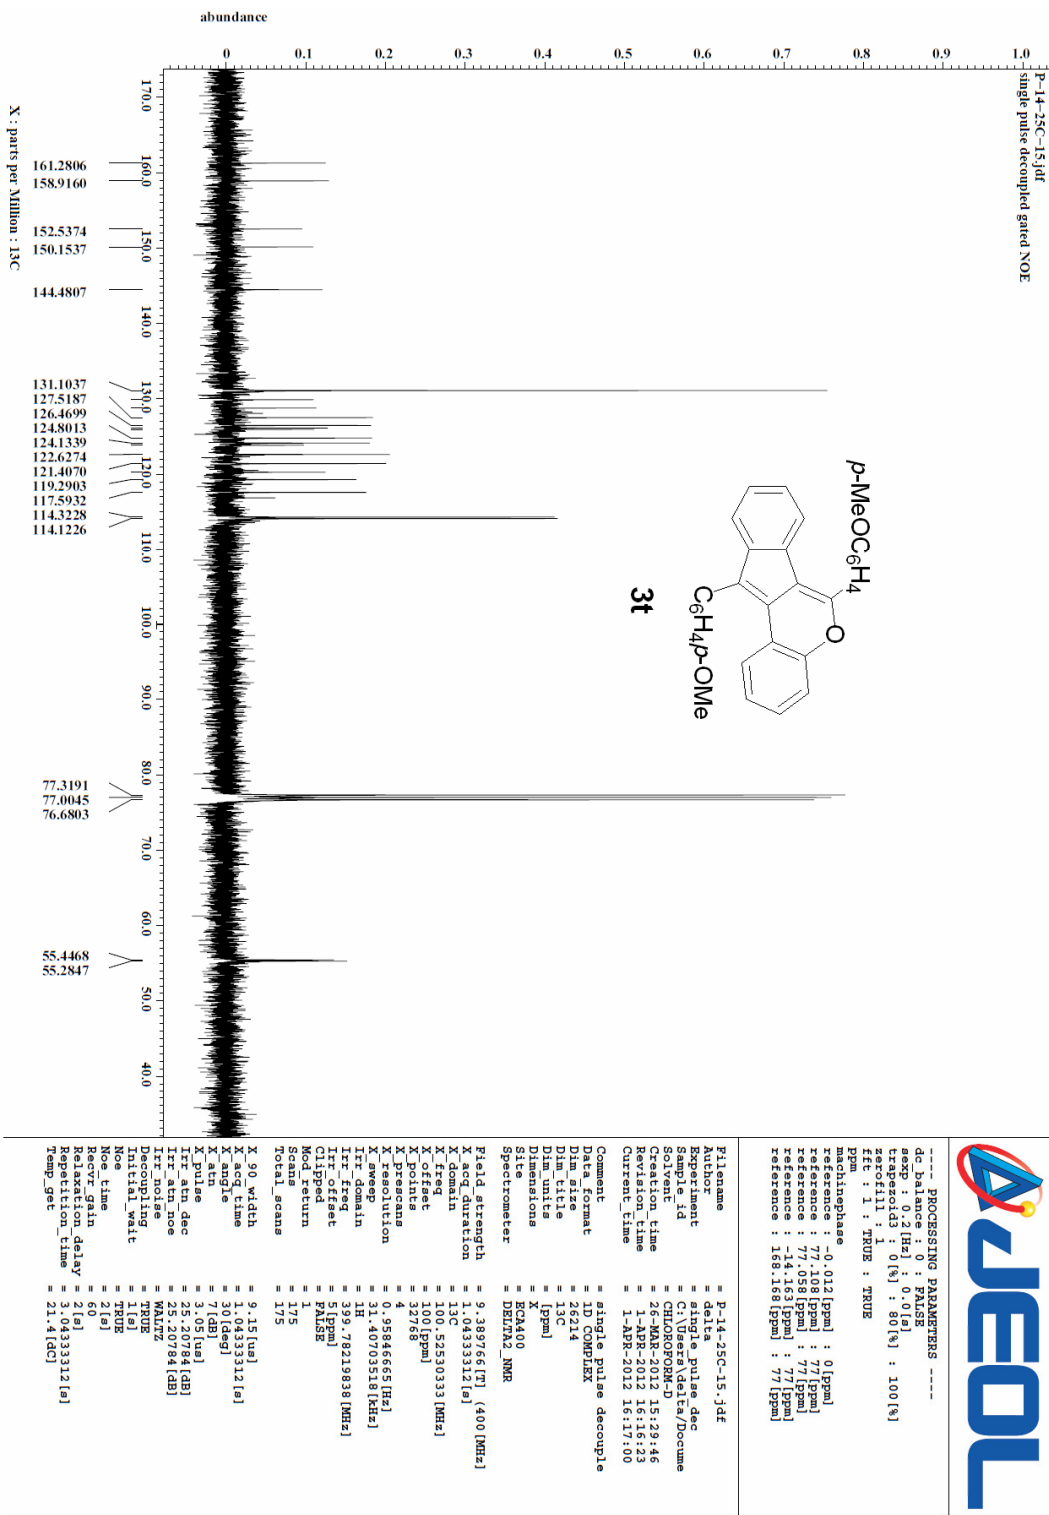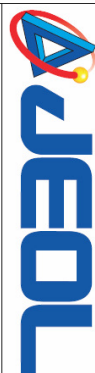

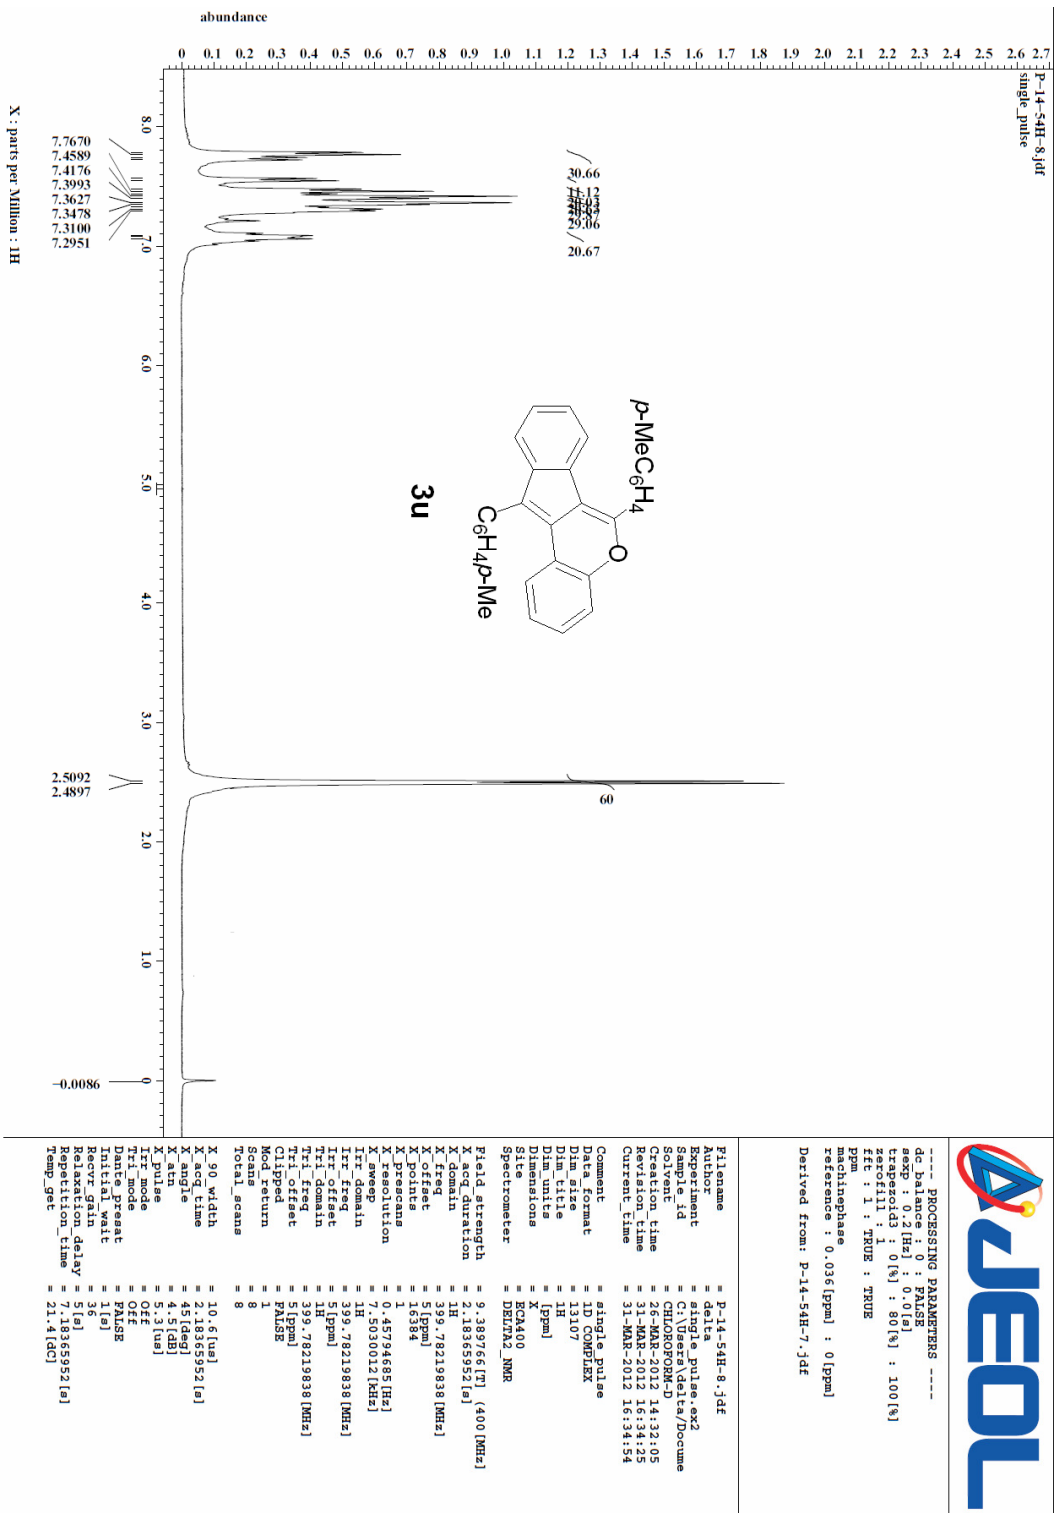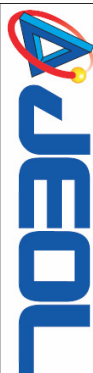

----- PROCESSING PARAMETERS -----  
 dc\_balance : 0 : FALSE  
 exp : 0.2 [Hz] : 0.0 [s]  
 freq : 399.78219838 [MHz] : 80 [kHz] : 100 [kHz]  
 f2 : 1 : TRUE : TRUE  
 ppm  
 machinephase  
 reference : 0.036 [ppm] : 0 [ppm]  
 Derived from: P-14-54H-7.fdf

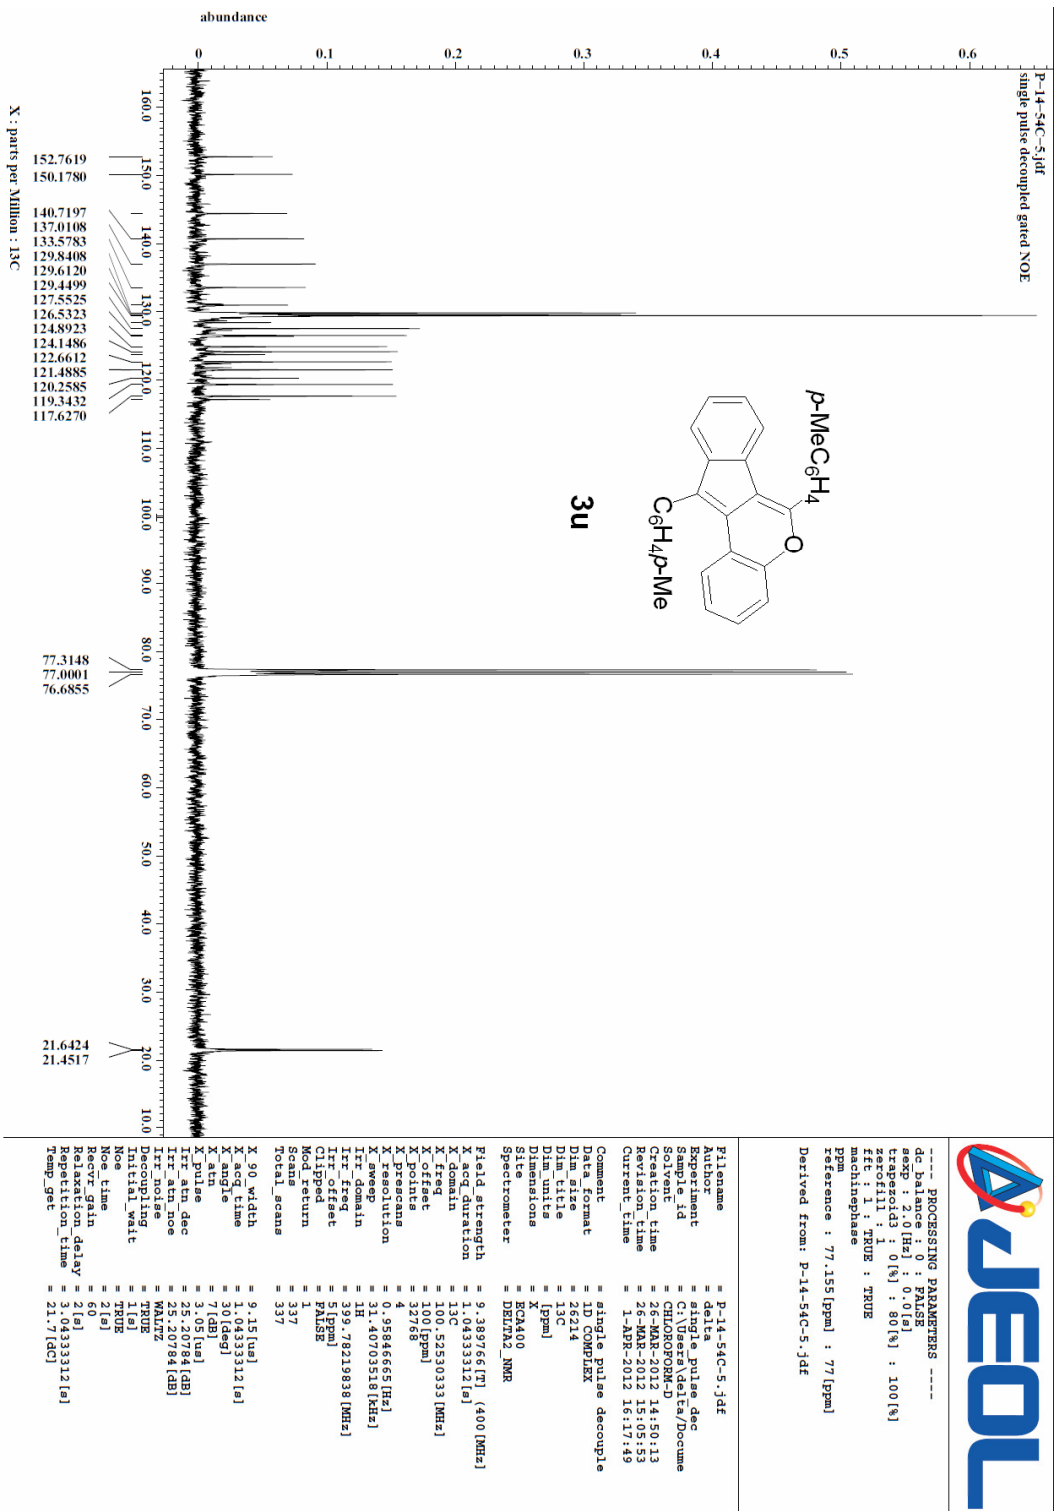

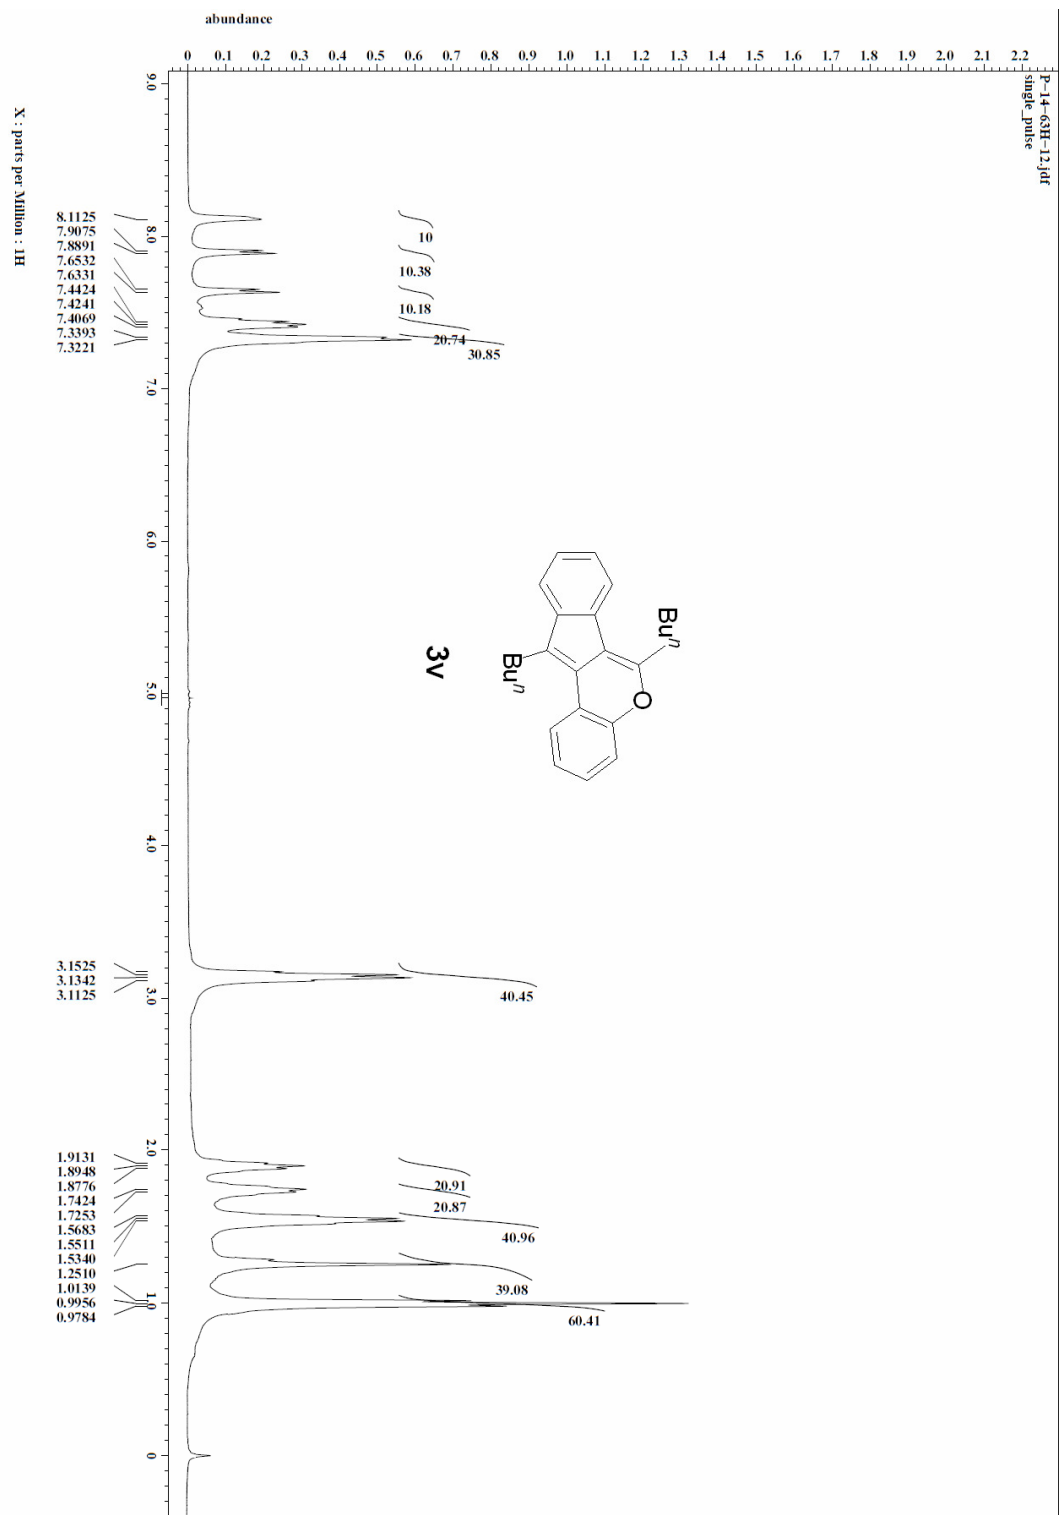

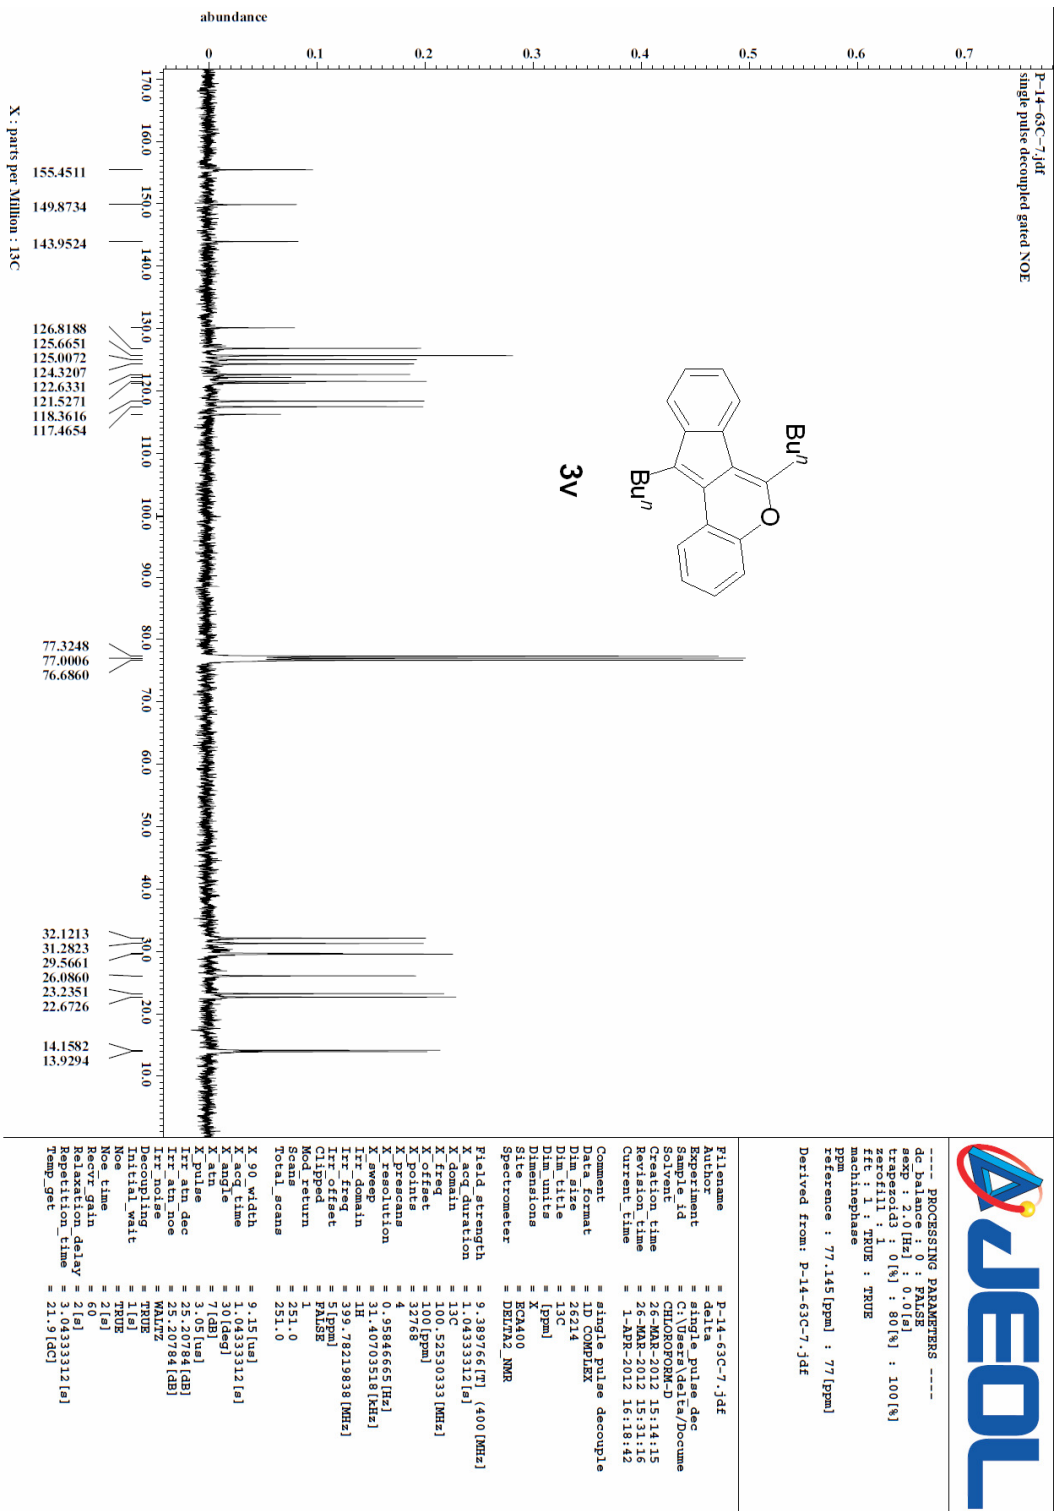



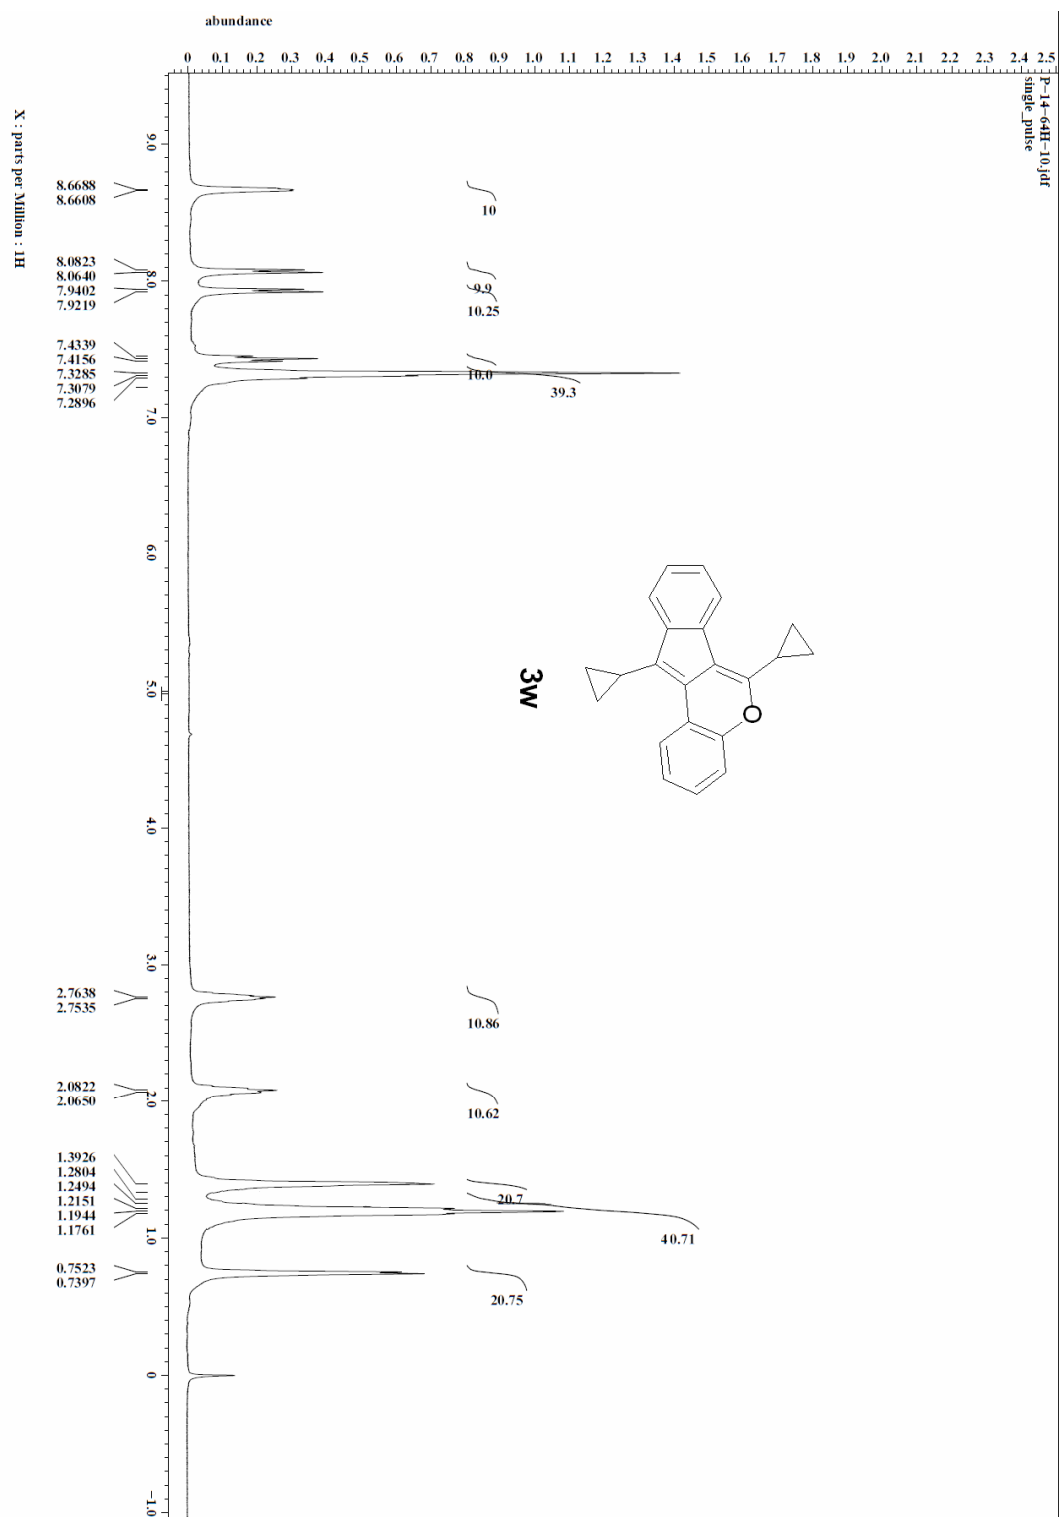

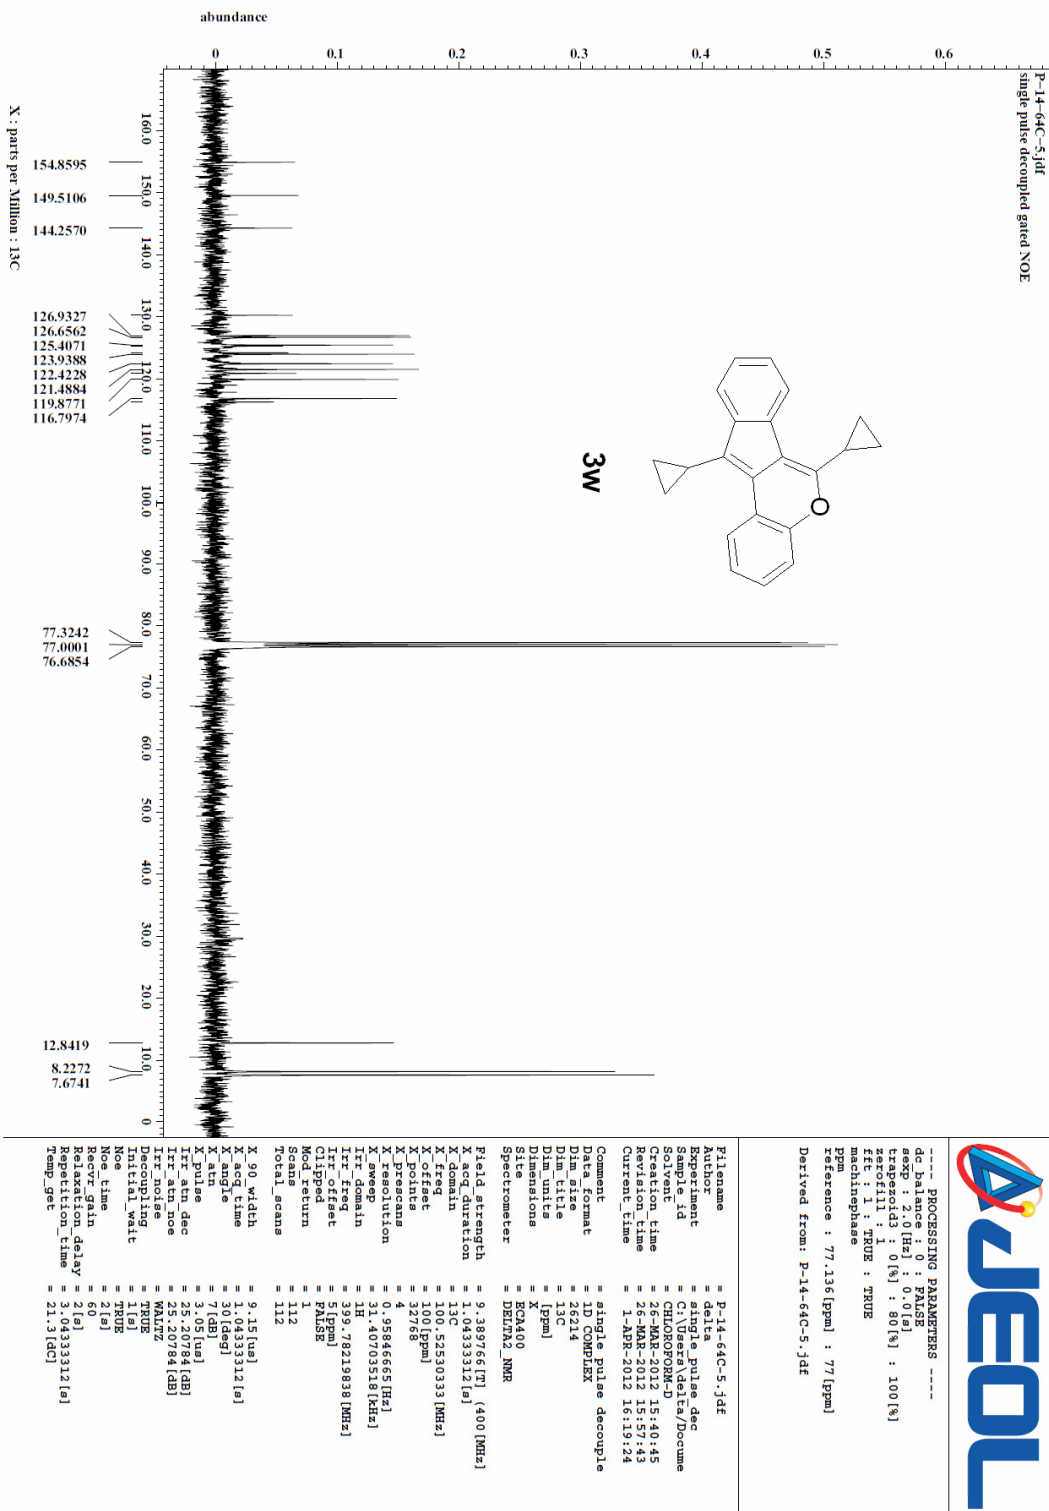

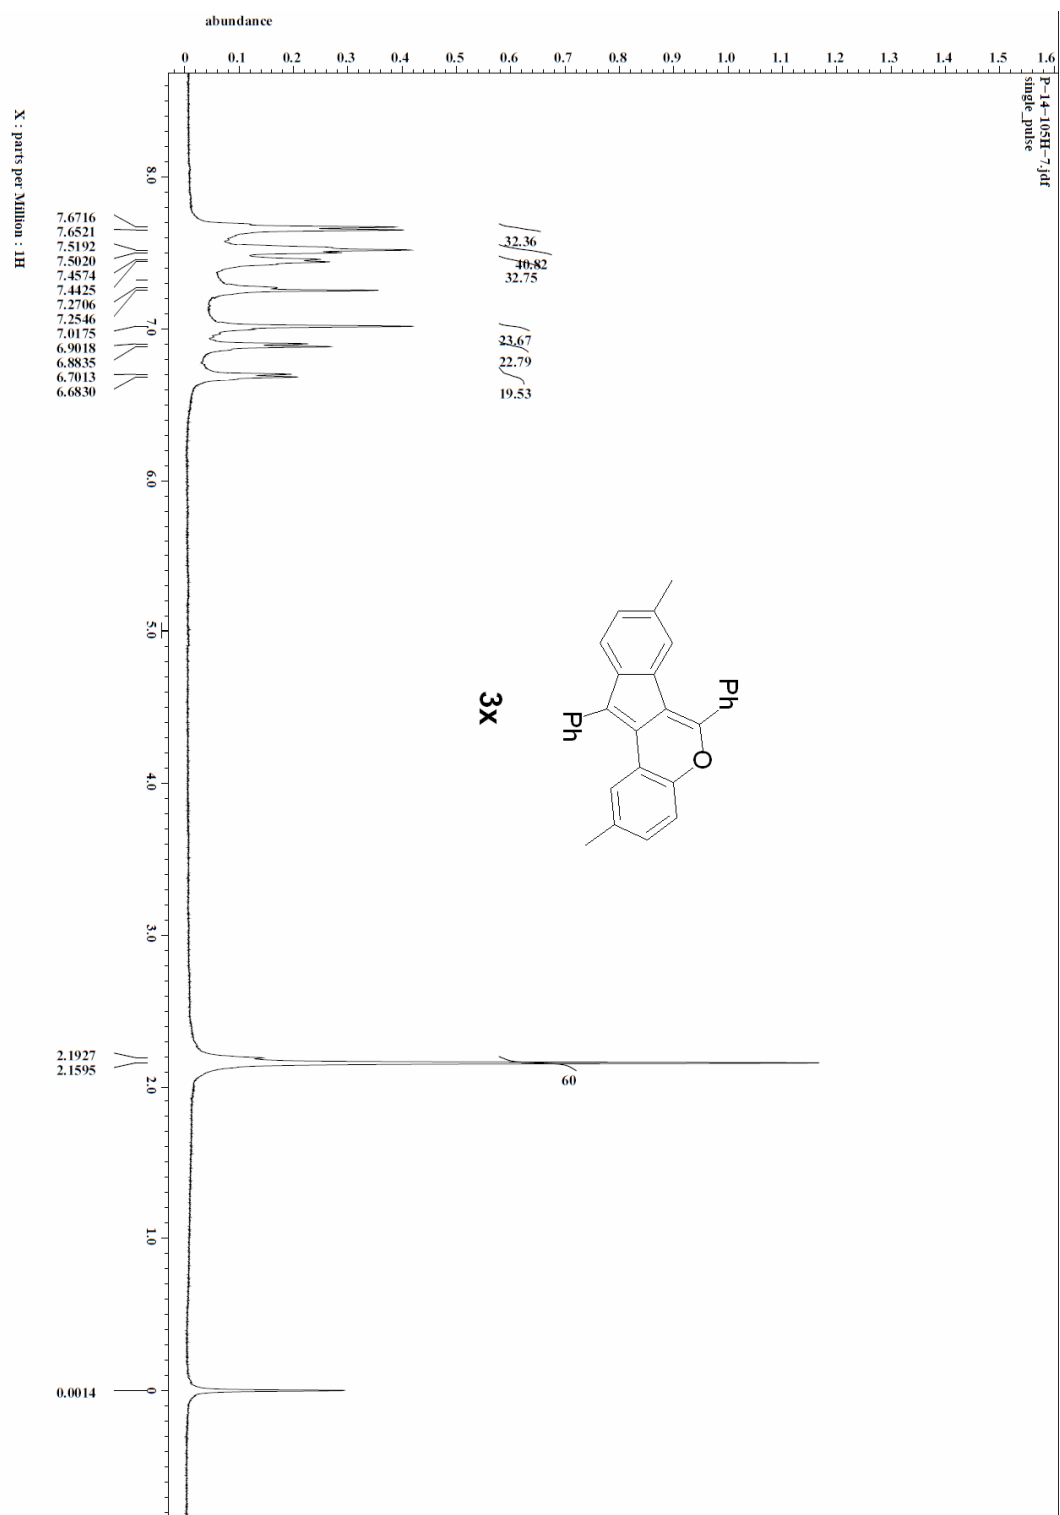

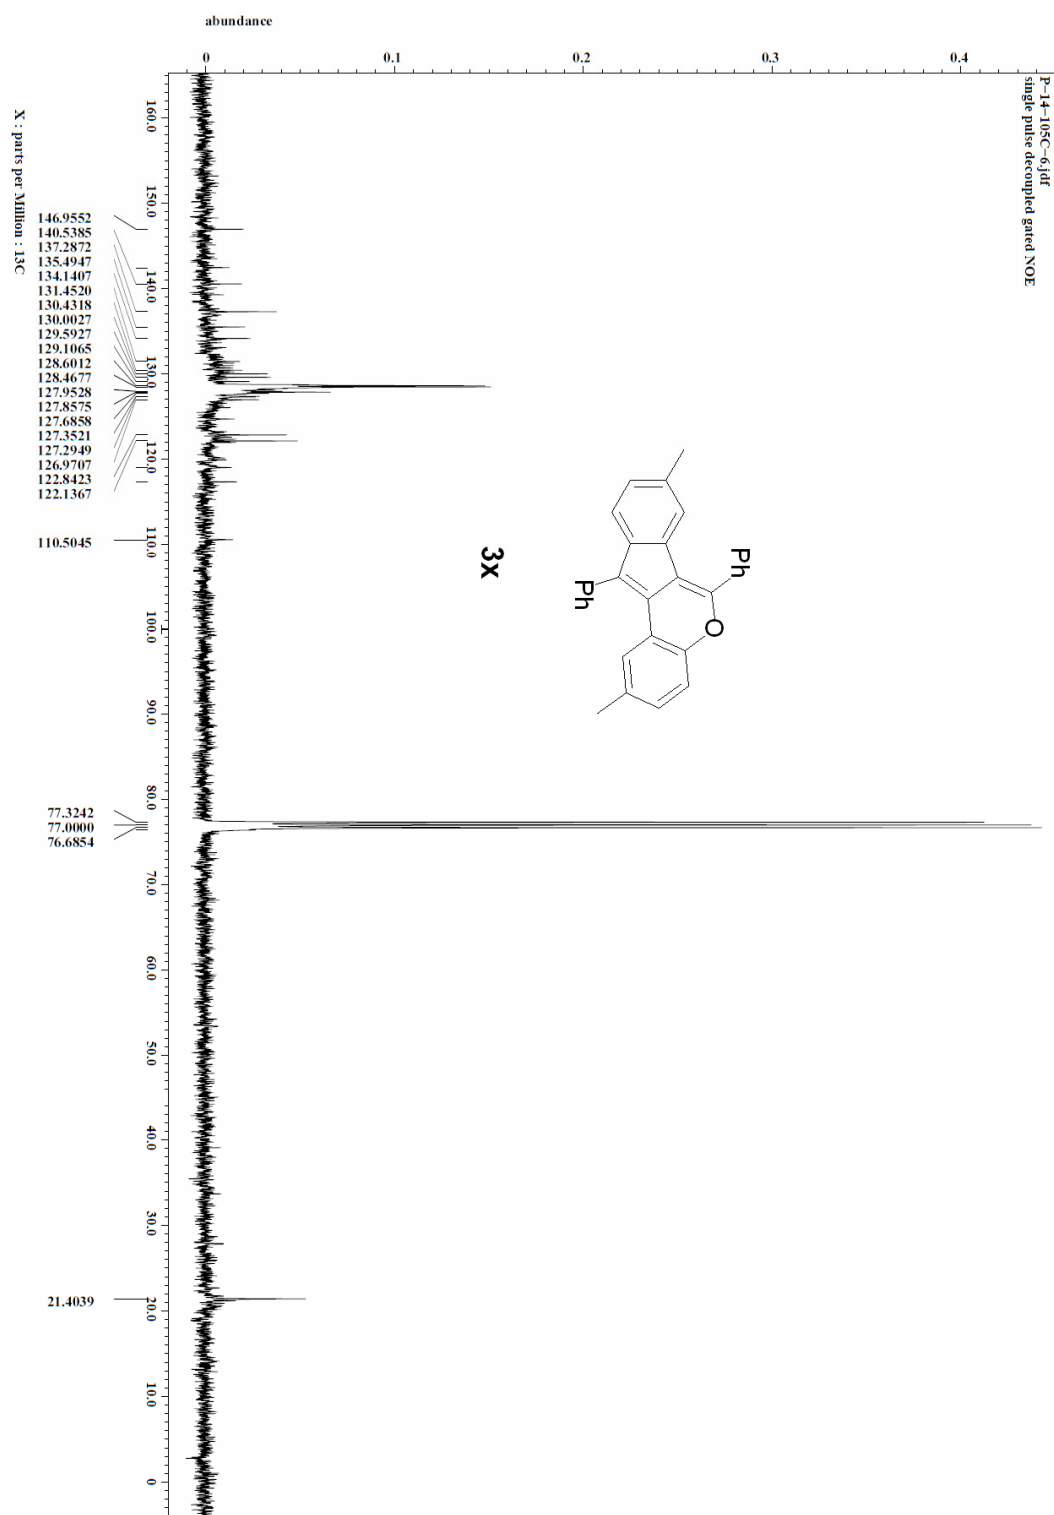

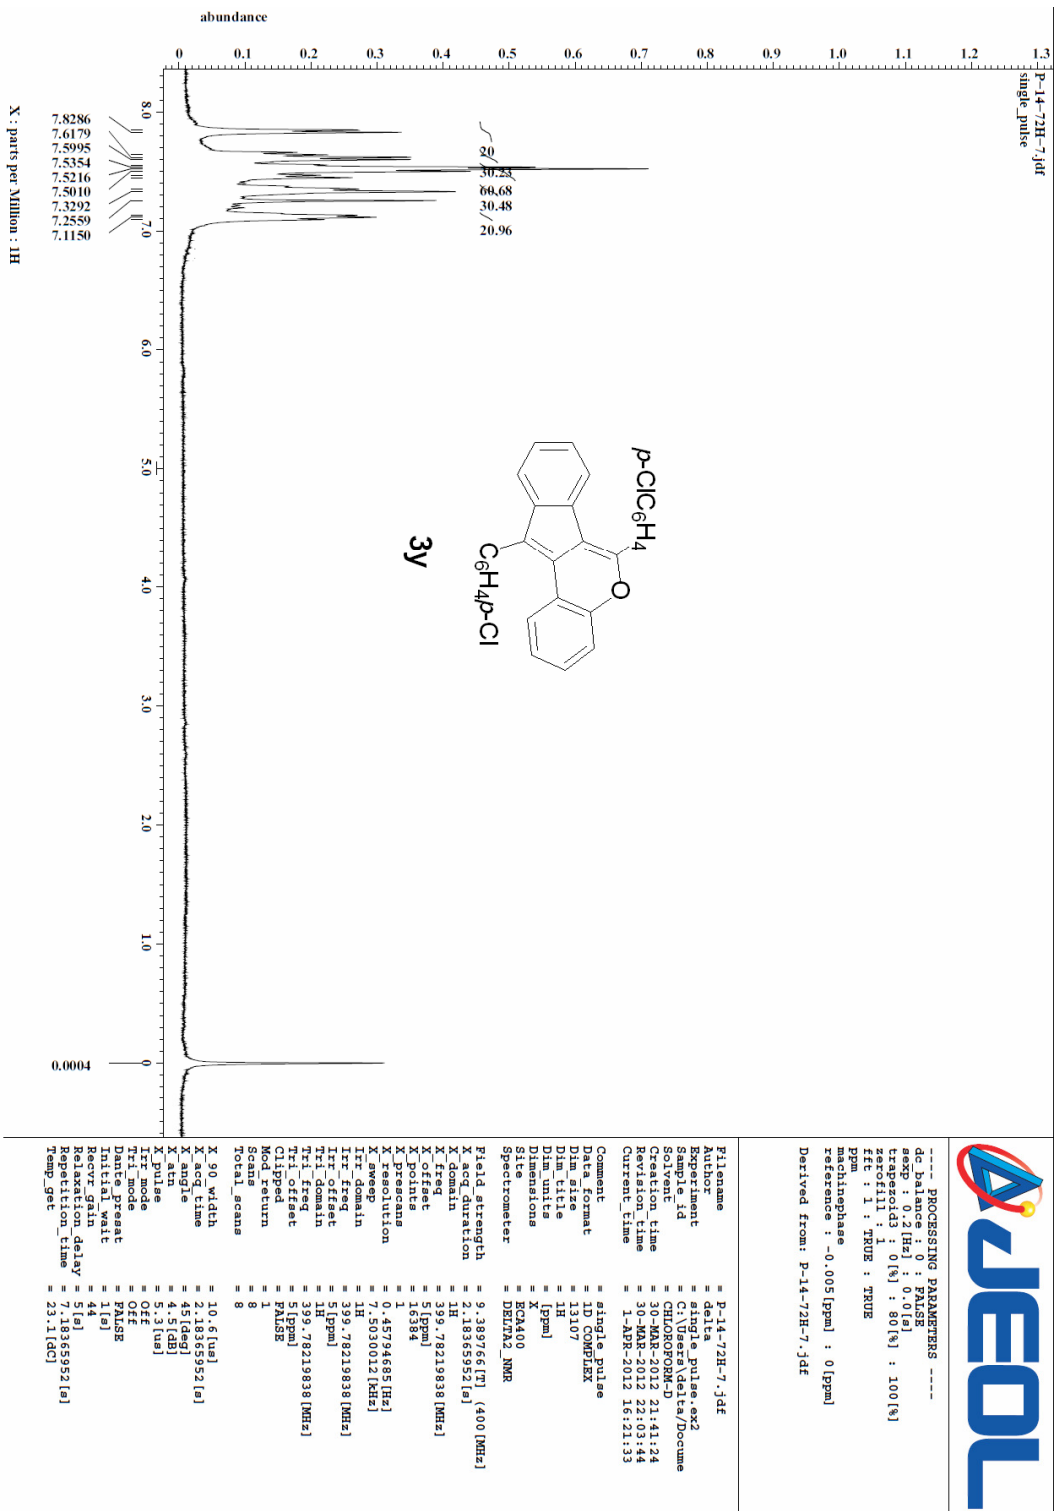

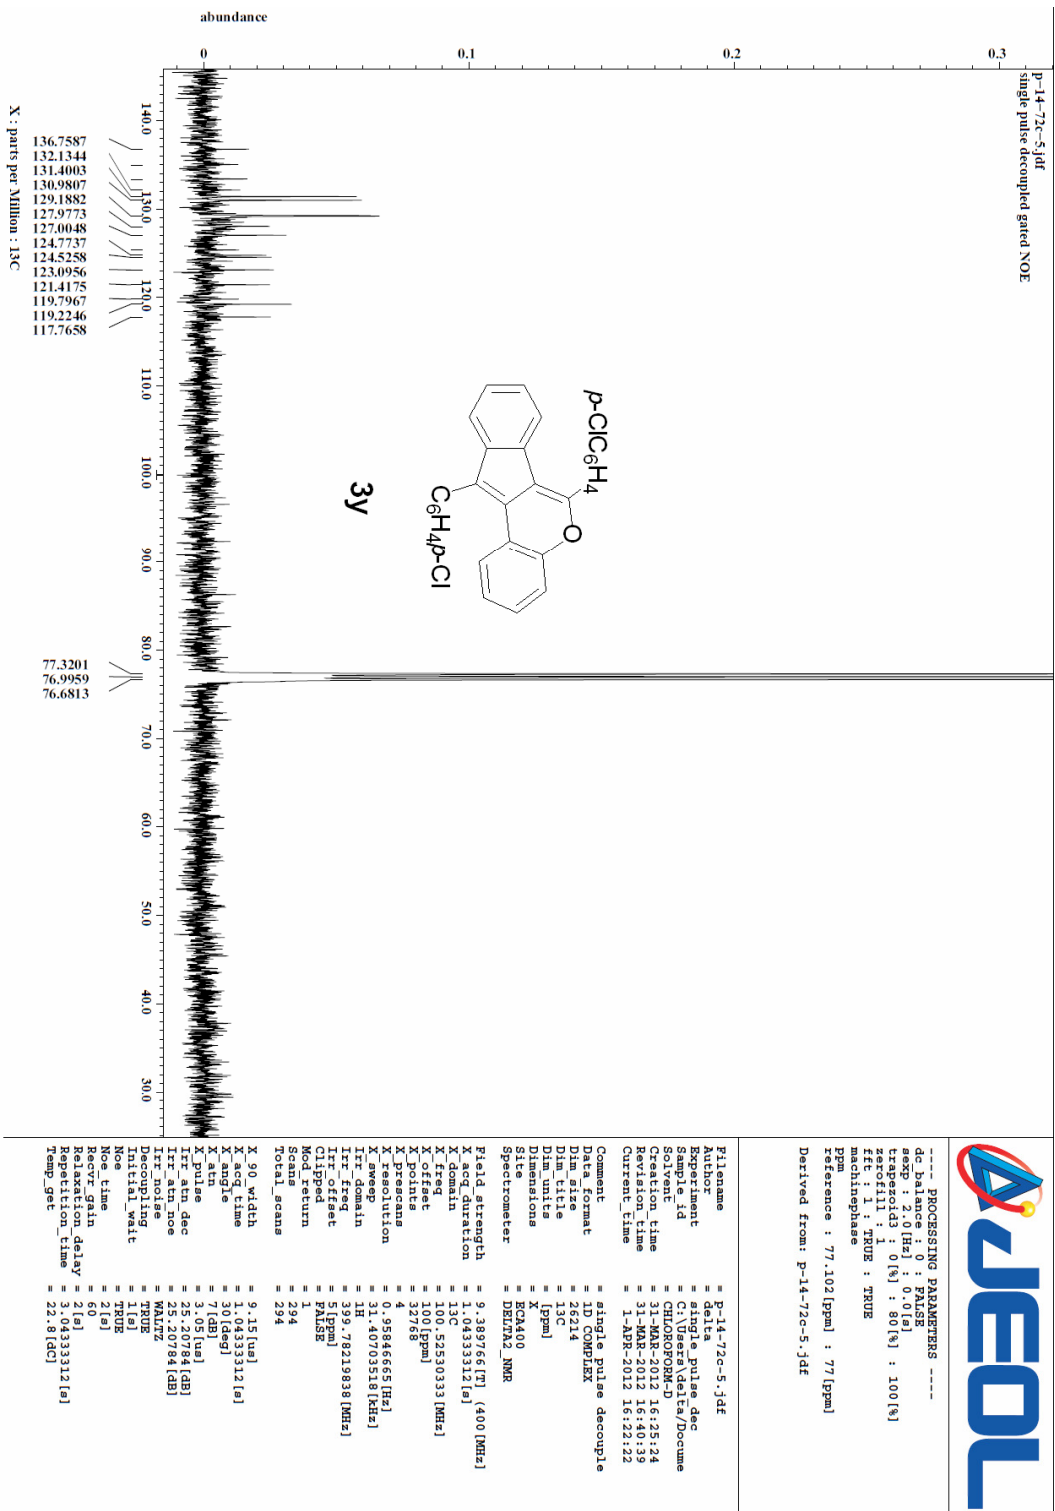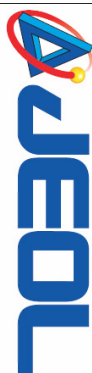

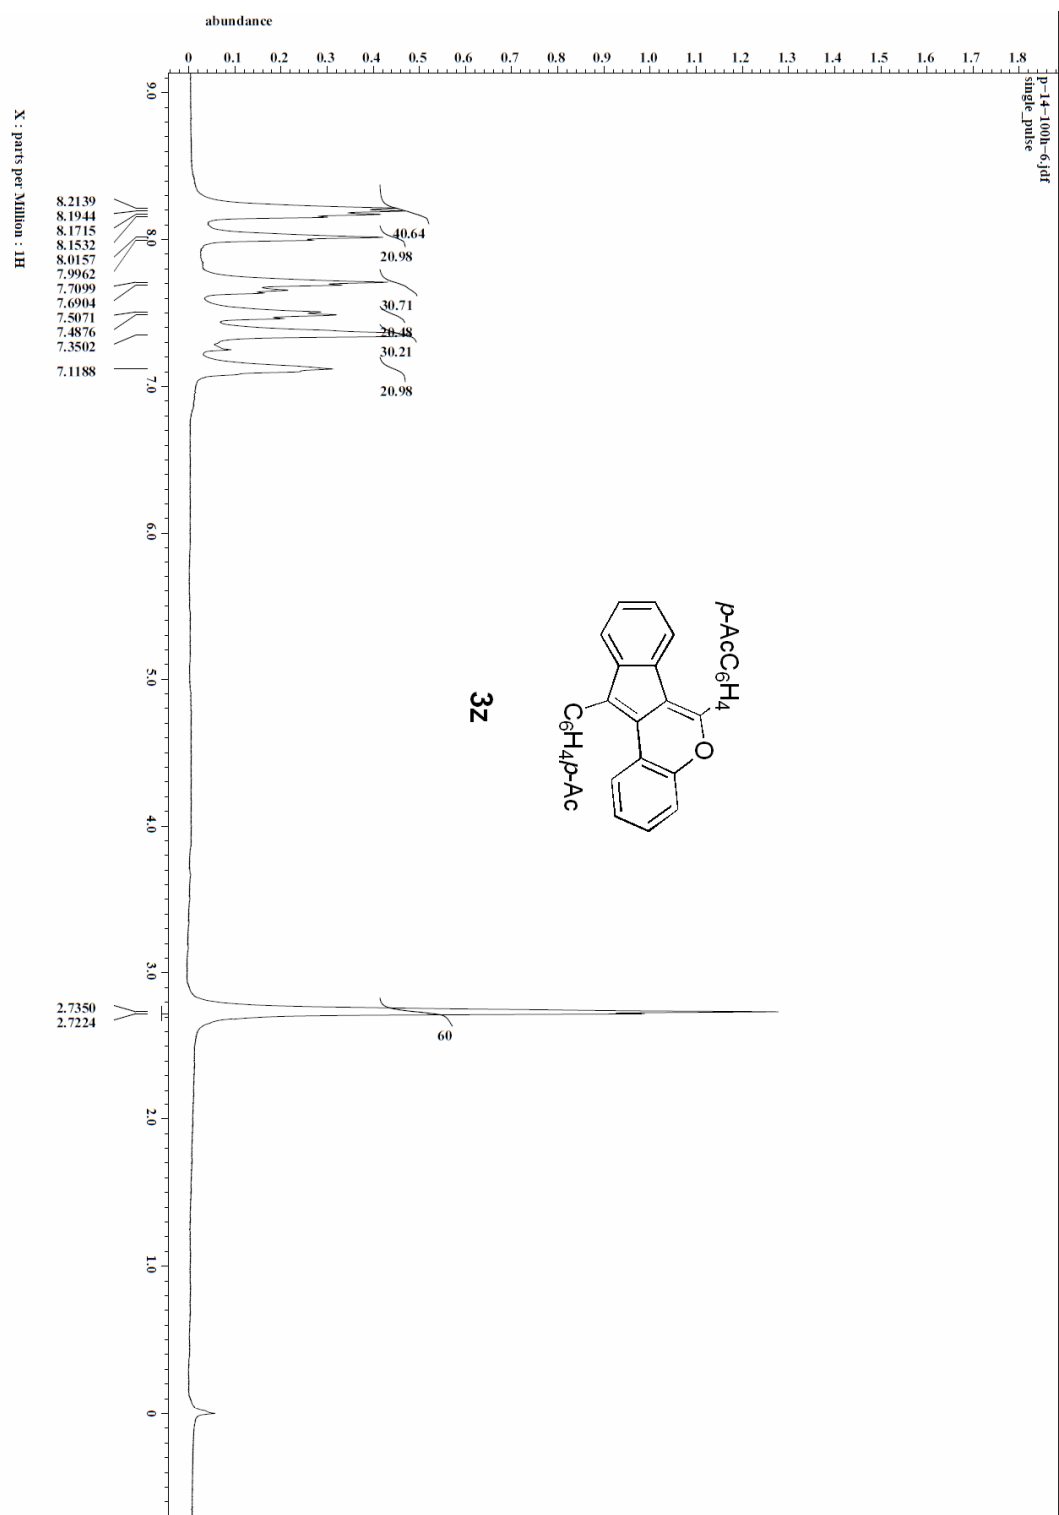

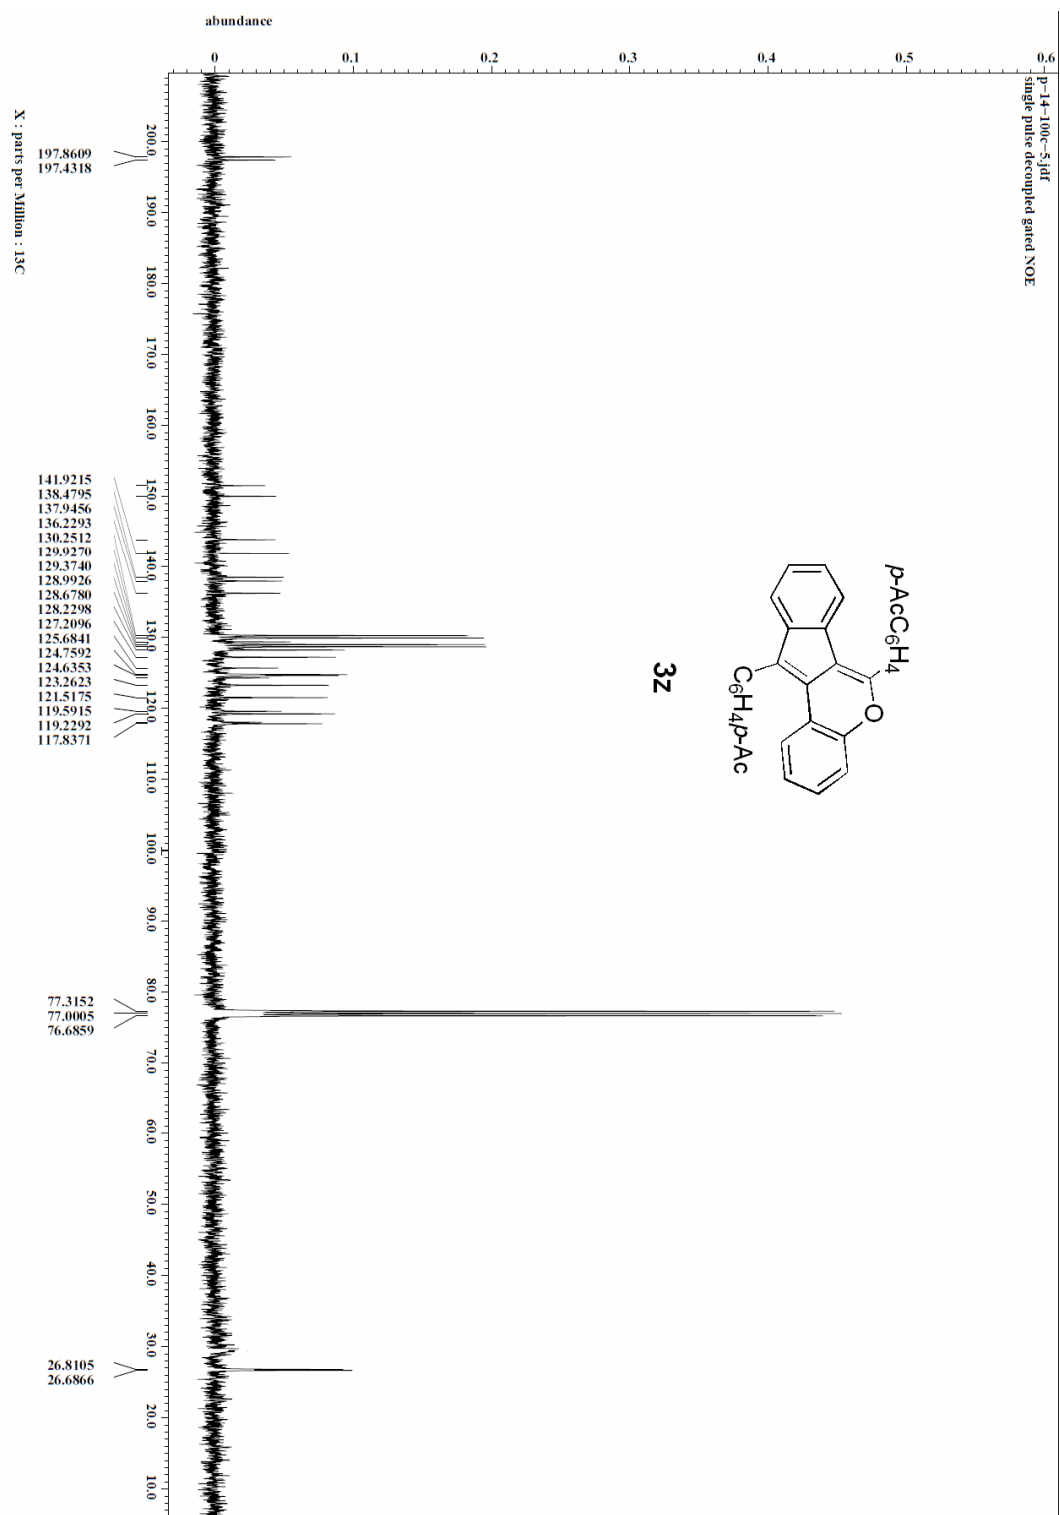

Supplement: c2ob26369f.pdf [file c2ob26369f.pdf]
